# Supplementary material for: Novel oxoisochromene synthesisviachemoselective O–H insertion of 1,3-dicarbonyl compounds and subsequent Pd-catalyzed intramolecular arylation reaction
Source: Royal Society of Chemistry journal article supplement (doi:10.1039/d3nj02306k), 2023-01-01

## Supporting Information

### ***“Novel oxoisochromene synthesis via chemoselective O-H insertion of 1,3-dicarbonyl compounds and subsequent Pd-catalyzed intramolecular Heck reaction”***

Harshita Singh Korawat,<sup>a</sup> Manoj Kumar Saini,<sup>a</sup> Karmdeo Prajapati,<sup>a</sup> Ashok K. Basak\*<sup>a</sup>

<sup>a</sup>*Department of Chemistry, Institute of Science, Banaras Hindu University, Varanasi 221005, India*  
E-mail: akbasak.chem@bhu.ac.in

#### Contents:

|    |                                                                     |         |
|----|---------------------------------------------------------------------|---------|
| 1. | General experimental .....                                          | S2      |
| 2. | Starting material preparation .....                                 | S2      |
| 3. | Experimental procedure for chemoselective <i>O</i> -alkylation..... | S3      |
| 4. | Experimental procedure for intramolecular Heck reaction .....       | S6      |
| 5. | Analytical data for the synthesized oxoisochromenes.....            | S6-S8   |
| 6. | References .....                                                    | S9      |
| 7. | <sup>1</sup> H and <sup>13</sup> C NMR spectra .....                | S10-S46 |

**General Experimental:** Unless otherwise mentioned, all chemicals received from commercial sources were used without purification. All commercial grade solvents were used without any purification. Anhydrous solvents were obtained following standard procedures. Column chromatography was performed on 100-200 mesh silica gel using gradient mixture of ethyl acetate in hexanes.  $^1\text{H}$  and  $^{13}\text{C}$  NMR spectra were recorded on Jeol JNM-ECS spectrometer at operating frequencies of 500 MHz ( $^1\text{H}$ ) or 125 MHz ( $^{13}\text{C}$ ) and Bruker Avance Neo spectrometer at operating frequencies of 600 MHz ( $^1\text{H}$ ) or 150 MHz ( $^{13}\text{C}$ ) as indicated in the individual spectrum using TMS as an internal standard. HRMS spectra were recorded on SCIEX G2-SQ ToF (Waters, USA) mass spectrometer. Thin layer chromatography was performed on aluminum plates (silica gel 60 PF<sub>254</sub>, 0.25 mm) purchased from Merck. The multiplicity in  $^1\text{H}$  NMR spectra is presented as s for singlet, d for doublet, dd for doublet of doublet, t for triplet, dt for doublet of triplets, apt for apparently triplate, q for quartet, ABq for AB type quartet and m for multiplet.

**Starting material preparation:** 2-Bromoarybenzaldehydes were either purchased from commercial sources or prepared in the laboratory following reported procedures.<sup>1</sup> Arylsulfonylhydrazides were either obtained from commercial sources or prepared in the laboratory using commercially available arylsulfonylchlorides following reported procedure.<sup>2</sup>

#### Preparation of *N*-sulfonylarylhidrazones:

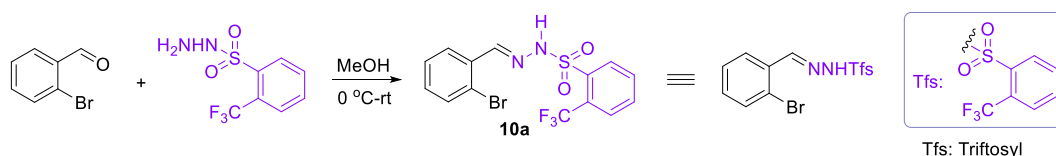

To the vigorously stirred solution of 2-bromobenzaldehyde (925 mg, 5.0 mmol) in MeOH (5.0 mL) at 0 °C was added *N*-2-(trifluoromethyl) benzenesulfonylhydrazide (1.20 g, 5.0 mmol). Then ice-water bath was removed and the reaction mixture was stirred at rt for 5 hours. TLC analysis indicated completed conversion. Then solvent evaporated and the crude product was recrystallized from hot THF to obtain pure *N*-sulfonylhydrazone **10a** as white crystalline solid (1.71 g, 84% yield).

|                   |                                                                                                                                                                                                                                                                                                                                                                                                                                                                                                                                                                                                                                                                                                                                                           |
|-------------------|-----------------------------------------------------------------------------------------------------------------------------------------------------------------------------------------------------------------------------------------------------------------------------------------------------------------------------------------------------------------------------------------------------------------------------------------------------------------------------------------------------------------------------------------------------------------------------------------------------------------------------------------------------------------------------------------------------------------------------------------------------------|
| <p><b>9</b></p>   | <p>Compound <b>9</b>: <math>^1\text{H}</math> NMR (DMSO-<math>d_6</math>, 500 MHz) <math>\delta</math> 12.5 (brs, 1H, NH), 8.17 (dd, <math>J = 4.0</math>, 8.0 Hz, 1H), 8.10 (dd, <math>J = 4.0</math>, 8.0 Hz, 1H), 8.00-7.97 (m, 2H), 7.81 (d, <math>J = 8.0</math> Hz, 1H), 7.73 (d, <math>J = 8.5</math> Hz, 1H), 7.48 (apt, <math>J = 8.0</math> Hz, 1H), 7.42 (apt, <math>J = 9.5</math> Hz, 1H); <math>^{13}\text{C}</math> NMR (DMSO-<math>d_6</math>, 125 MHz) <math>\delta</math> 147.8, 146.0, 135.0, 133.2, 132.7, 132.2, 132.1, 130.8, 130.6, 128.2, 127.0, 124.6, 123.4.</p>                                                                                                                                                                |
| <p><b>10a</b></p> | <p>Compound <b>10a</b>: <math>^1\text{H}</math> NMR (CDCl<sub>3</sub>+ DMSO-<math>d_6</math>, 600 MHz) <math>\delta</math> 8.32 (d, <math>J = 4.8</math> Hz, 1H), 8.21 (dd, <math>J = 4.2</math>, 8.4 Hz, 1H), 7.81 (apt, <math>J = 6.6</math> Hz, 1H), 7.71-7.62 (m, 3H), 7.46-7.41 (m, 1H), 7.18 (dd, <math>J = 4.8</math>, 7.8 Hz, 1H), 7.14-7.09 (m, 1H); <math>^{13}\text{C}</math> NMR (CDCl<sub>3</sub>+ DMSO-<math>d_6</math>, 150 MHz) <math>\delta</math> 145.2 (q, <math>J_{\text{C-F}} = 4.6</math> Hz), 138.0, 132.6, 132.5, 132.5 (2C), 132.0, 131.9, 130.8, 127.8 (q, <math>J_{\text{C-F}} = 6.6</math> Hz), 127.4 (q, <math>J_{\text{C-F}} = 33.0</math> Hz), 127.2, 127.1, 123.5, 122.5 (q, <math>J_{\text{C-F}} = 272.4</math> Hz).</p> |

The following *N*-sulfonylhydrazones were synthesized following the procedure described above:

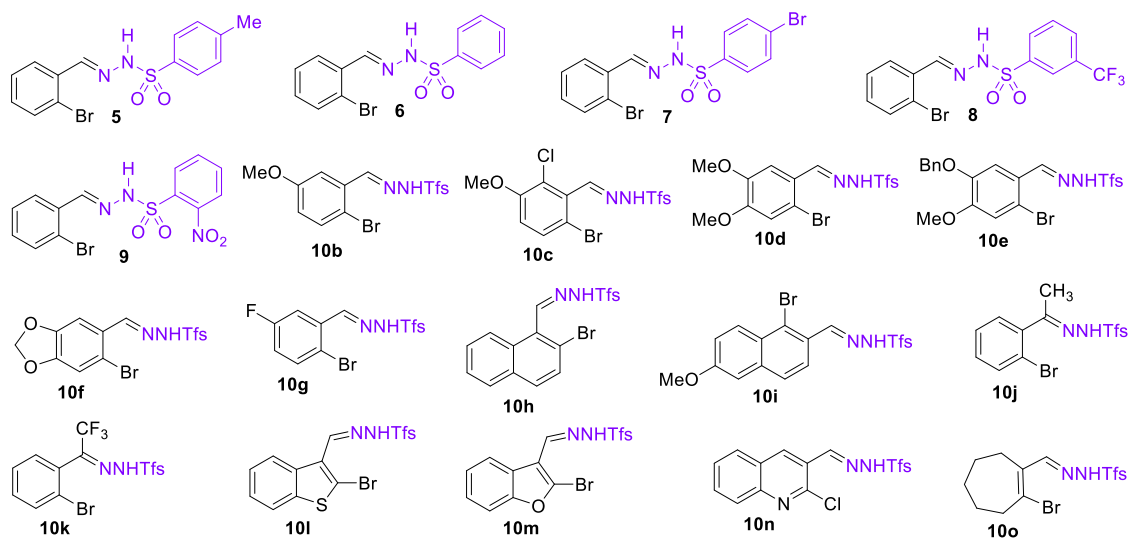

### Experimental procedure for chemoselective *O*-alkylation of 1,3-diketone:

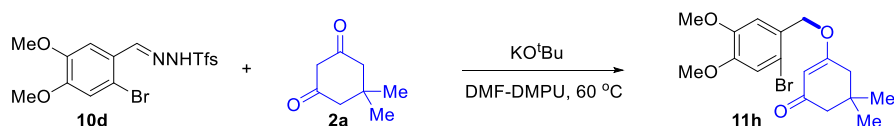

To a stirred solution of dimedone **2a** (56.1 mg, 0.40 mmol) in dry DMF-DMPU (4:1, 0.80 mL) under nitrogen atmosphere was added KO<sup>t</sup>Bu (45.0 mg, 0.40 mmol) at rt. The mixture was then stirred at 60 °C for 15 minutes. Then, solid *N*-trifluoromethylsulfonamide **10a** (93.5 mg, 0.20 mmol) was added in portions over 2 minutes. The resulting mixture was stirred at 60 °C for 15 minutes and then cooled to rt. The reaction mixture was then diluted with ethyl acetate (25 mL) and extracted with brine (3 x 10 mL). Organic layer was dried over Na<sub>2</sub>SO<sub>4</sub> and evaporated. The crude product was purified by silica gel column chromatography using 10% ethyl acetate in hexanes as eluent to obtain vinyl ether **11h** (61.3 mg, 83% yield) as light brown oil.

The following vinyl ethers were synthesized according to the procedure described above:

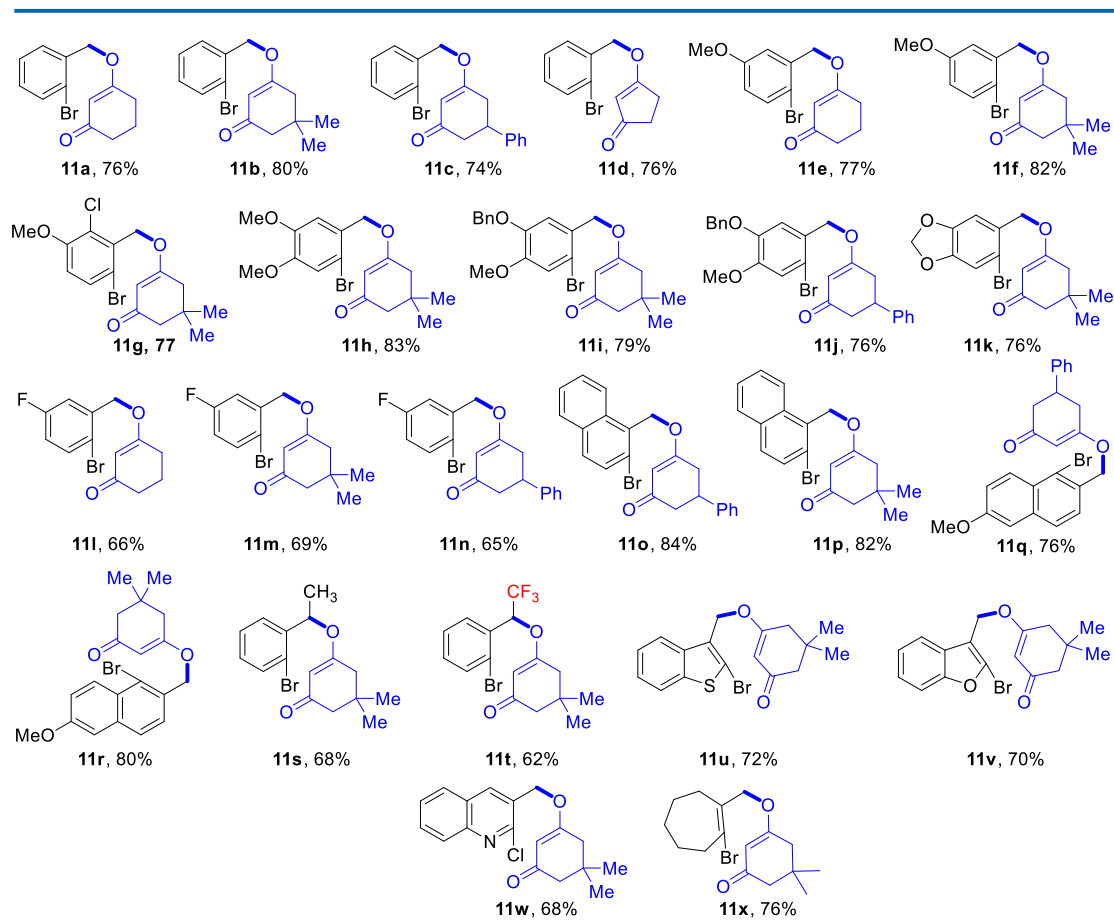

#### Analytical data of selected vinyl ethers:

|                                                                                     |                                                                                                                                                                                                                                                                                                                                                                                                                                                                                                                                                                                                                                                                            |
|-------------------------------------------------------------------------------------|----------------------------------------------------------------------------------------------------------------------------------------------------------------------------------------------------------------------------------------------------------------------------------------------------------------------------------------------------------------------------------------------------------------------------------------------------------------------------------------------------------------------------------------------------------------------------------------------------------------------------------------------------------------------------|
| 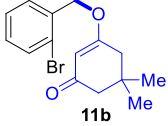 | Compound <b>11b</b> : 47.1 mg, 76% yield; white solid, mp 105-106 °C; purified using 10% ethyl acetate in hexanes as eluent; <b><sup>1</sup>H NMR</b> (CDCl <sub>3</sub> , 500 MHz) δ 7.52 (d, <i>J</i> = 7.0 Hz, 1H), 7.35 (d, <i>J</i> = 8.0 Hz, 1H), 7.27 (apt, <i>J</i> = 8.0 Hz, 1H), 7.14 (apt, <i>J</i> = 8.0 Hz, 1H), 5.42 (s, 1H), 4.90 (s, 2H), 2.31 (s, 2H), 2.17 (s, 2H), 1.03 (s, 6H); <b><sup>13</sup>C NMR</b> (CDCl <sub>3</sub> , 125 MHz) δ 199.4, 175.5, 134.4, 132.9, 129.8, 129.1, 127.6, 122.8, 102.4, 69.8, 50.7, 42.7, 32.6, 28.3.                                                                                                                 |
|  | Compound <b>11d</b> : 39.8 mg, 76% yield; white solid, mp 43-45 °C; purified using 10% ethyl acetate in hexanes as eluent; <b><sup>1</sup>H NMR</b> (CDCl <sub>3</sub> , 500 MHz) δ 7.55 (d, <i>J</i> = 8.0 Hz, 1H), 7.38 (d, <i>J</i> = 6.5 Hz, 1H), 7.29 (apt, <i>J</i> = 8.0 Hz, 1H), 7.17 (apt, <i>J</i> = 8.0 Hz, 1H), 5.36 (s, 1H), 5.03 (s, 2H), 2.62 (apt, <i>J</i> = 2.5 Hz, 2H), 2.41 (apt, <i>J</i> = 2.5 Hz, 2H); <b><sup>13</sup>C NMR</b> (CDCl <sub>3</sub> , 125 MHz) δ 205.7, 189.4, 133.9, 133.0, 130.2, 129.5, 127.7, 123.1, 105.7, 72.9, 34.1, 28.4.                                                                                                   |
|  | Compound <b>11f</b> : 55.7 mg, 82% yield; light yellow solid, mp 79-81°C; purified using 10% ethyl acetate in hexanes as eluent; <b><sup>1</sup>H NMR</b> (CDCl <sub>3</sub> , 500 MHz) δ 7.39 (d, <i>J</i> = 8.0 Hz, 1H), 6.90 (s, 1H), 6.70 (dd, <i>J</i> = 3.0, 9.0 Hz, 1H), 5.40 (s, 1H), 4.86 (s, 2H), 3.73 (s, 3H), 2.32 (s, 2H), 2.17 (s, 2H), 1.03 (s, 6H); <b><sup>13</sup>C NMR</b> (CDCl <sub>3</sub> , 125 MHz) δ 199.4, 175.4, 159.1, 135.3, 133.4, 115.1, 114.9, 112.8, 102.5, 69.7, 55.5, 50.7, 42.7, 32.5, 28.3, 21.9; <b>HRMS</b> (ESI-TOF) calculated for C <sub>16</sub> H <sub>20</sub> BrO <sub>3</sub> [M+H] <sup>+</sup> : 339.0596 found 339.0606. |
|  | Compound <b>11h</b> : 61.3 mg, 83% yield; white solid, mp 85-87°C; purified using 10% ethyl acetate in hexanes as eluent; <b><sup>1</sup>H NMR</b> (CDCl <sub>3</sub> , 500 MHz) δ 6.97 (s, 1H), 6.83 (s, 1H), 5.41 (s, 1H), 4.82 (s, 2H), 3.80 (s, 6H), 2.28 (s, 2H), 2.16 (s, 2H), 1.02 (s, 6H); <b><sup>13</sup>C NMR</b> (CDCl <sub>3</sub> , 125 MHz) δ 199.4, 175.5, 149.7, 148.5, 126.2, 115.5, 113.7, 112.3,                                                                                                                                                                                                                                                       |

|                                                                                     |                                                                                                                                                                                                                                                                                                                                                                                                                                                                                                                                                                                                                                                                                                                                                                                                                                      |
|-------------------------------------------------------------------------------------|--------------------------------------------------------------------------------------------------------------------------------------------------------------------------------------------------------------------------------------------------------------------------------------------------------------------------------------------------------------------------------------------------------------------------------------------------------------------------------------------------------------------------------------------------------------------------------------------------------------------------------------------------------------------------------------------------------------------------------------------------------------------------------------------------------------------------------------|
|                                                                                     | 102.3, 69.9, 56.2, 56.0, 50.7, 42.7, 32.5, 28.2; <b>HRMS</b> (ESI-TOF) calculated for $C_{17}H_{22}BrO_4$ $[M+H]^+$ : 370.0701 found 370.0711.                                                                                                                                                                                                                                                                                                                                                                                                                                                                                                                                                                                                                                                                                       |
| 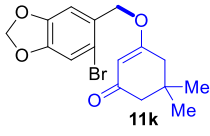   | Compound <b>11i</b> : 53.8 mg, 76% yield; white solid, mp 65-67°C; purified using 10% ethyl acetate in hexanes as eluent; <b><sup>1</sup>H NMR</b> ( $CDCl_3$ , 500 MHz) $\delta$ 6.96 (s, 1H), 6.81 (s, 1H), 5.93 (s, 2H), 5.39 (s, 1H), 4.80 (s, 2H), 2.28 (s, 2H), 2.17 (s, 2H), 1.02 (s, 6H); <b><sup>13</sup>C NMR</b> ( $CDCl_3$ , 125 MHz) $\delta$ 199.4, 175.4, 148.5, 147.6, 127.5, 113.8, 113.0, 109.1, 102.4, 102.0, 69.9, 50.7, 42.7, 32.5, 28.3; <b>HRMS</b> (ESI-TOF) calculated for $C_{16}H_{18}BrO_4$ $[M+H]^+$ : 353.0388 found 353.0393.                                                                                                                                                                                                                                                                         |
|    | Compound <b>11l</b> : 39.5 mg, 66% yield; white solid, mp 65-67°C; purified using 10% ethyl acetate in hexanes as eluent; purified using 15% ethyl acetate in hexanes as eluent; <b><sup>1</sup>H NMR</b> ( $CDCl_3$ , 500 MHz) $\delta$ 7.45 (dd, $J = 3.0, 8.5$ Hz, 1H), 7.11 (dd, $J = 3.0, 6.5$ Hz, 1H), 6.86 (dt, $J = 2.5, 8.0$ Hz, 1H), 5.39 (s, 1H), 4.84 (s, 2H), 2.45 (apt, $J = 7.0$ Hz, 2H), 2.30 (apt, $J = 8.0$ Hz, 2H), 1.99-1.93 (m, 2H); <b><sup>13</sup>C NMR</b> ( $CDCl_3$ , 125 MHz) $\delta$ 199.4, 176.6, 162.0 (d, $J_{C-F} = 246.2$ Hz), 136.5 (d, $J_{C-F} = 6.6$ Hz), 133.9 (d, $J_{C-F} = 8.2$ Hz), 116.6 (d, $J_{C-F} = 21.6$ Hz), 116.0, 115.7 (d, $J_{C-F} = 23.2$ Hz), 103.7, 68.9, 36.6, 28.7, 21.0; <b>HRMS</b> (ESI-TOF) calculated for $C_{13}H_{13}BrFO_2$ $[M+H]^+$ : 299.0083 found 299.0093. |
|    | Compound <b>11m</b> : 45.2 mg, 69% yield; white solid, mp 70-72 °C ; purified using 15% ethyl acetate in hexanes as eluent; <b><sup>1</sup>H NMR</b> ( $CDCl_3$ , 500 MHz) $\delta$ 7.46 (dd, $J = 5.0, 9.0$ Hz, 1H), 7.11 (dd, $J = 3.0, 9.0$ Hz, 1H), 6.88 (dt, $J = 2.5, 9.0$ Hz, 1H), 5.40 (s, 1H), 4.87 (s, 2H), 2.33 (s, 2H), 2.18 (s, 2H); <b><sup>13</sup>C NMR</b> ( $CDCl_3$ , 125 MHz) $\delta$ 199.3, 175.0, 162.0 (d, $J_{C-F} = 246.2$ Hz), 136.7 (d, $J_{C-F} = 8.2$ Hz), 134.1 (d, $J_{C-F} = 6.6$ Hz), 116.7 (d, $J_{C-F} = 23.3$ Hz), 116.0, 115.7 (d, $J_{C-F} = 24.8$ Hz), 102.7, 69.1, 50.7, 42.7, 32.6, 28.3; <b>HRMS</b> (ESI-TOF) calculated for $C_{15}H_{17}BrFO_2$ $[M+H]^+$ : 327.0396 found 327.0405.                                                                                                   |
|  | Compound <b>11n</b> : 48.7 mg, 65% yield; white solid; mp 75-77 °C; purified using 10% ethyl acetate in hexanes as eluent; <b><sup>1</sup>H NMR</b> ( $CDCl_3$ , 500 MHz) $\delta$ 7.50 (dd, $J = 8.0, 9.0$ Hz, 1H), 7.33 (apt, $J = 6.5$ Hz, 2H), 7.27-7.23 (m, 3H), 7.15 (dd, $J = 8.0, 2.5$ Hz, 1H), 6.94-6.89 (m, 1H), 5.54 (s, 1H), 4.94 (s, 2H), 3.40 (m, 1H), 2.79-2.53 (m, 4H); <b><sup>13</sup>C NMR</b> ( $CDCl_3$ , 125 MHz) $\delta$ 198.3, 175.6, 162.0 (d, $J_{C-F} = 246$ Hz), 142.3, 136.4, (d, $J_{C-F} = 8.3$ Hz), 133.9 (d, $J_{C-F} = 8.2$ Hz), 128.7, 127.0, 126.5, 116.7 (d, $J_{C-F} = 21.6$ Hz), 116.0, 115.7 (d, $J_{C-F} = 23.2$ Hz), 103.5, 69.2, 43.7, 39.1, 36.2; <b>HRMS</b> (ESI-TOF) calculated for $C_{19}H_{17}BrFO_2$ $[M+H]^+$ : 375.0396 found 375.0392.                                        |
|  | Compound <b>11s</b> : 40.2 mg, 68% yield; yellow solid, mp 79-81°C; purified using 10% acetone in hexanes as eluent; <b><sup>1</sup>H NMR</b> ( $CDCl_3$ , 500 MHz) $\delta$ 7.52 (d, $J = 8.0$ Hz, 1H), 7.33-7.27 (m, 2H), 7.14 (apt, $J = 8.0$ Hz, 1H), 5.51 (q, $J = 6.5$ Hz, 1H), 5.14 (s, 1H), 2.51-2.42 (m, 2H), 2.32-2.23 (m, 2H), 2.01-1.91 (m, 2H), 1.57 (d, $J = 7.0$ Hz, 3H); <b><sup>13</sup>C NMR</b> ( $CDCl_3$ , 125 MHz) $\delta$ 199.5, 175.8, 140.4, 132.9, 129.3, 128.0, 126.0, 121.3, 104.8, 75.4, 36.6, 29.1, 21.9, 21.1; <b>HRMS</b> (ESI-TOF) calculated for $C_{14}H_{16}BrO_2$ $[M+H]^+$ : 295.0333 found 295.0322.                                                                                                                                                                                         |
|  | Compound <b>11t</b> : 46.7 mg, 62% yield; white solid, mp 62-64 °C; purified using 10% ethyl acetate in hexanes as eluent; <b><sup>1</sup>H NMR</b> ( $CDCl_3$ , 500 MHz) $\delta$ 7.56 (d, $J = 8.0$ Hz, 1H), 7.39 (d, $J = 8.0$ Hz, 1H), 7.30 (apt, $J = 8.0$ Hz, 1H), 7.22 (apt, $J = 8.0$ Hz, 1H), 5.80 (dd, $J = 6.5$ Hz, 1H), 5.06 (s, 1H), 2.34 (ABq, $J = 17.5$ Hz, 2H), 2.09 (ABq, $J = 16.0$ Hz, 2H), 1.02 (s, 3H), 0.92 (s, 3H); <b><sup>13</sup>C NMR</b> ( $CDCl_3$ , 125 MHz) $\delta$ 198.7, 172.4, 133.4, 131.7, 130.2, 128.6, 128.1, 124.3, 122.7 (q, $J_{C-F} = 279.1$ Hz), 104.3, 75.6 (q, $J_{C-F} = 33.2$ Hz), 50.6, 42.5, 32.5, 28.2, 27.9; <b>HRMS</b> (ESI-TOF) calculated for $C_{16}H_{17}BrF_3O_2$ $[M+H]^+$ : 377.0364 found 377.0342.                                                                   |
|  | Compound <b>11u</b> : 52.6 mg, 72% yield; white solid, mp 242-244 °C; purified using 15% ethyl acetate in hexanes as eluent; <b><sup>1</sup>H NMR</b> ( $CDCl_3$ , 500 MHz) $\delta$ 7.68 (d, $J = 8.0$ Hz, 1H), 7.63 (d, $J = 6.5$ Hz, 1H), 7.34-7.28 (m, 2H), 5.55 (s, 1H), 5.04 (s, 2H), 2.24 (s, 2H), 2.12 (s, 2H), 1.01 (s, 6H); <b><sup>13</sup>C NMR</b> ( $CDCl_3$ , 125 MHz) $\delta$ 199.3, 175.4, 155.5, 129.1, 127.3, 125.0, 123.7, 119.0, 114.3, 111.2, 102.2, 61.6, 50.7, 42.7, 32.5, 28.2; <b>HRMS</b> (ESI-TOF) calculated for $C_{17}H_{18}BrO_2S$ $[M+H]^+$ : 365.0211 found 365.0218.                                                                                                                                                                                                                             |
|  | Compound <b>11v</b> : 48.9 mg, 70% yield; white solid, mp 242-244 °C; purified using 15% ethyl acetate in hexanes as eluent; <b><sup>1</sup>H NMR</b> ( $CDCl_3$ , 500 MHz) $\delta$ 7.46 (d, $J = 6.5$ Hz, 1H), 7.39 (d, $J = 8.0$ Hz, 1H), 7.24 (apt, $J = 8.0$ Hz, 1H), 7.20 (apt, $J = 8.0$ Hz, 1H), 5.48 (s, 1H), 4.92 (s, 2H), 2.25 (s, 2H), 2.16 (s, 2H), 1.01 (s, 6H); <b><sup>13</sup>C NMR</b> ( $CDCl_3$ , 125 MHz) $\delta$ 199.3, 175.4, 155.5, 129.1, 127.3, 125.0, 123.7, 119.0, 114.3, 111.2, 102.2,                                                                                                                                                                                                                                                                                                                 |

|                                                                                   |                                                                                                                                                                                                                                                                                                                                                                                                                                                                                                                                                                                                                                                                                                                                |
|-----------------------------------------------------------------------------------|--------------------------------------------------------------------------------------------------------------------------------------------------------------------------------------------------------------------------------------------------------------------------------------------------------------------------------------------------------------------------------------------------------------------------------------------------------------------------------------------------------------------------------------------------------------------------------------------------------------------------------------------------------------------------------------------------------------------------------|
|                                                                                   | 61.6, 50.7, 42.7, 32.5, 28.2; <b>HRMS</b> (ESI-TOF) calculated for C <sub>17</sub> H <sub>18</sub> BrO <sub>3</sub> [M+H] <sup>+</sup> : 349.0439 found 349.0451.                                                                                                                                                                                                                                                                                                                                                                                                                                                                                                                                                              |
| 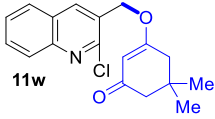 | Compound <b>11w</b> : 43.1 mg, 68% yield; white solid, mp 168-170 °C; purified using 20% ethyl acetate in hexanes as eluent; <b><sup>1</sup>H NMR</b> (CDCl <sub>3</sub> , 500 MHz) δ 8.15 (s, 1H), 7.97 (d, <i>J</i> = 9.0 Hz, 1H), 7.78 (d, <i>J</i> = 8.0 Hz, 1H), 7.69 (apt, <i>J</i> = 8.0 Hz, 1H), 7.53 (apt, <i>J</i> = 7.5 Hz, 1H), 5.49 (s, 1H), 5.04 (s, 2H), 2.37 (s, 2H), 2.20 (s, 2H), 1.02 (s, 6H); <b><sup>13</sup>C NMR</b> (CDCl <sub>3</sub> , 125 MHz) δ 199.2, 175.0, 148.9, 147.3, 137.3, 130.9, 128.4, 127.6, 127.5, 127.0, 126.9, 102.6, 66.9, 50.7, 42.7, 32.6, 28.3; <b>HRMS</b> (ESI) calculated for C <sub>18</sub> H <sub>19</sub> ClNO <sub>2</sub> [M+H] <sup>+</sup> : 316.1106 found 316.1102. |
|  | Compound <b>11x</b> : 49.1 mg, 75% yield; white solid, mp 62-64°C; purified using 10% ethyl acetate in hexanes as eluent; <b><sup>1</sup>H NMR</b> (CDCl <sub>3</sub> , 500 MHz) δ 5.39 (s, 1H), 4.52 (s, 2H), 2.80 (apt, <i>J</i> = 5.0 Hz, 2H), 2.31-2.27 (m, 1H), 2.21 (s, 2H), 1.78-1.74 (m, 2H), 1.62-1.57 (m, 2H), 1.53-1.49 (m, 2H), 1.50 (s, 6H); <b><sup>13</sup>C NMR</b> (CDCl <sub>3</sub> , 125 MHz) δ 199.4, 175.7, 135.8, 126.8, 102.1, 73.1, 50.7, 42.7, 41.4, 32.4, 31.2, 30.3, 28.2, 25.4, 25.1; <b>HRMS</b> (ESI) calculated for C <sub>16</sub> H <sub>24</sub> BrO <sub>2</sub> [M+H] <sup>+</sup> : 327.0959 found 327.0941.                                                                             |

### Experimental procedure for intramolecular Heck reaction:

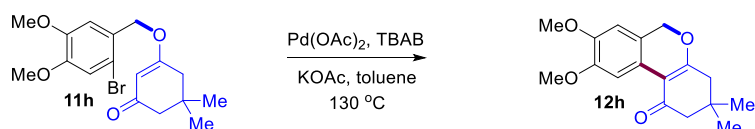

A 35 mL pressure tube fitted with a magnetic stir bar and nitrogen inlet was charged with vinyl ether **11h** (36.9 mg, 0.10 mmol), KOAc (24.5 mg, 0.25 mmol), tetra-*n*-butylammonium bromide (32.3 mg, 0.10 mmol), Pd(OAc)<sub>2</sub> (2.3 mg, 0.010 mmol) and toluene (1.0 mL). The mixture was purged briefly with nitrogen, sealed with Teflon® screw cap and placed in a pre-heated oil bath at 130 °C. After stirring for 3 hours, the reaction mixture was cooled to rt, diluted with ethyl acetate (15 mL), washed with brine (2 x 10 mL), dried over Na<sub>2</sub>SO<sub>4</sub> and evaporated. The crude product was purified by silica gel column chromatography using 15% ethyl acetate in hexanes as eluent to obtain compound **12h** (19.1 mg, 66% yield) as light brown oil.

### Analytical data for synthesized tricyclic oxoisochromenes:

|                                                                                     |                                                                                                                                                                                                                                                                                                                                                                                                                                                                                                                                                                                                                                                                    |
|-------------------------------------------------------------------------------------|--------------------------------------------------------------------------------------------------------------------------------------------------------------------------------------------------------------------------------------------------------------------------------------------------------------------------------------------------------------------------------------------------------------------------------------------------------------------------------------------------------------------------------------------------------------------------------------------------------------------------------------------------------------------|
| 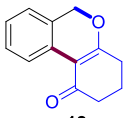 | Compound <b>12a</b> : 18.1 mg, 90% yield; light yellow oil; purified using 5% ethyl acetate in hexanes as eluent; <b><sup>1</sup>H NMR</b> (CDCl <sub>3</sub> , 500 MHz) δ 8.29 (d, <i>J</i> = 7.5 Hz, 1H), 7.32 (apt, <i>J</i> = 6.5 Hz, 1H), 7.20 (apt, <i>J</i> = 7.5 Hz, 1H), 7.02 (d, <i>J</i> = 7.5 Hz, 1H), 5.11 (s, 2H), 2.59-2.51 (m, 4H), 2.03-1.96 (m, 2H); <b><sup>13</sup>C NMR</b> (CDCl <sub>3</sub> , 125 MHz) δ 196.4, 174.1, 128.8, 128.5, 126.8, 124.8, 123.6, 113.3, 69.5, 38.2, 28.8, 20.0.                                                                                                                                                   |
|  | Compound <b>12b</b> : 21.0 mg, 92% yield; yellow oil; purified using 5% ethyl acetate in hexanes as eluent; <b><sup>1</sup>H NMR</b> (CDCl <sub>3</sub> , 500 MHz) δ 8.39 (d, <i>J</i> = 8.5 Hz, 1H), 7.31 (apt, <i>J</i> = 7.5 Hz, 1H), 7.20 (apt, <i>J</i> = 7.5 Hz, 1H), 7.02 (d, <i>J</i> = 6.5 Hz, 1H), 5.12 (s, 2H), 2.43 (s, 2H), 2.40 (s, 2H), 1.10 (s, 2H); <b><sup>13</sup>C NMR</b> (CDCl <sub>3</sub> , 125 MHz) δ 196.3, 172.5, 128.5, 127.6, 126.8, 126.7, 124.6, 123.6, 111.7, 69.4, 52.1, 42.5, 29.7, 28.2; <b>HRMS</b> (ESI-TOF) calculated for C <sub>15</sub> H <sub>17</sub> O <sub>2</sub> [M+H] <sup>+</sup> : 229.1228 found 229.1248.      |
|  | Compound <b>12c</b> : 24.3 mg, 88% yield; light brown oil; purified using 5% ethyl acetate in hexanes as eluent; <b><sup>1</sup>H NMR</b> (CDCl <sub>3</sub> , 500 MHz) δ 8.39 (d, <i>J</i> = 8.5 Hz, 1H), 7.31 (apt, <i>J</i> = 7.5 Hz, 1H), 7.20 (apt, <i>J</i> = 7.5 Hz, 1H), 7.02 (d, <i>J</i> = 6.5 Hz, 1H), 5.12 (s, 2H), 2.43 (s, 2H), 2.40 (s, 2H), 1.10 (s, 2H); <b><sup>13</sup>C NMR</b> (CDCl <sub>3</sub> , 125 MHz) δ 196.3, 172.5, 128.5, 127.6, 126.8, 126.7, 124.6, 123.6, 111.7, 69.4, 52.1, 42.5, 29.7, 28.2; <b>HRMS</b> (ESI-TOF) calculated for C <sub>19</sub> H <sub>17</sub> O <sub>2</sub> [M+H] <sup>+</sup> : 277.1228 found 277.1228. |
|  | Compound <b>12d</b> : 13.1 mg, 70% yield; brown solid, mp 150-152 °C; purified using 10% ethyl acetate in hexanes as eluent; <b><sup>1</sup>H NMR</b> (CDCl <sub>3</sub> , 500 MHz) δ 8.04 (d, <i>J</i> = 6.5 Hz, 1H), 7.22 (apt, <i>J</i> = 8.0 Hz, 1H), 7.13 (apt, <i>J</i> = 8.0 Hz, 1H), 6.94 (d, <i>J</i> = 8.0 Hz, 1H), 5.40 (s, 2H), 2.58 (apt, <i>J</i> = 5.5 Hz, 2H), 2.51 (apt, <i>J</i> = 2.5 Hz, 2H); <b><sup>13</sup>C NMR</b> (CDCl <sub>3</sub> , 125 MHz) δ 200.7, 185.1, 128.7, 127.6, 126.5, 125.3, 123.5, 122.0, 71.9, 34.2, 25.9.                                                                                                              |

|                                                                                                                                   |                                                                                                                                                                                                                                                                                                                                                                                                                                                                                                                                                                                                                                                                                                                                                                                                                                           |
|-----------------------------------------------------------------------------------------------------------------------------------|-------------------------------------------------------------------------------------------------------------------------------------------------------------------------------------------------------------------------------------------------------------------------------------------------------------------------------------------------------------------------------------------------------------------------------------------------------------------------------------------------------------------------------------------------------------------------------------------------------------------------------------------------------------------------------------------------------------------------------------------------------------------------------------------------------------------------------------------|
| 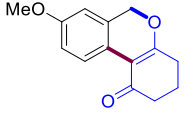 <p style="text-align: center;"><b>12e</b></p>   | <p>Compound <b>12e</b>: 15.7 mg, 68% yield; white solid, mp 75-76 °C; purified using 15% ethyl acetate in hexanes as eluent; <b><sup>1</sup>H NMR</b> (CDCl<sub>3</sub>, 500 MHz) δ 8.27 (d, <i>J</i> = 8.5 Hz, 1H), 6.85 (dd, <i>J</i> = 7.5, 1.5 Hz, 1H), 6.57 (s, 1H), 5.08 (s, 2H), 3.80 (s, 3H), 2.57-2.50 (m, 4H), 2.02-1.96 (m, 2H); <b><sup>13</sup>C NMR</b> (CDCl<sub>3</sub>, 125 MHz) δ 196.5, 172.4, 158.5, 128.7, 126.3, 120.5, 113.1, 109.8, 69.3, 55.3, 38.2, 29.7, 28.7, 20.1.</p>                                                                                                                                                                                                                                                                                                                                       |
|  <p style="text-align: center;"><b>12f</b></p>   | <p>Compound <b>12f</b>: 18.1 mg, 70% yield; white oil; purified using 10% ethyl acetate in hexanes as eluent; <b><sup>1</sup>H NMR</b> (CDCl<sub>3</sub>, 500 MHz) δ 8.33 (d, <i>J</i> = 9.0 Hz, 1H), 6.83 (dd, <i>J</i> = 6.5, 2.5 Hz, 1H), 6.56 (s, 1H), 5.08 (s, 2H), 3.78 (s, 3H), 2.40 (s, 2H), 2.37 (s, 2H), 1.08 (s, 6H); <b><sup>13</sup>C NMR</b> (CDCl<sub>3</sub>, 125 MHz) δ 196.5, 170.8, 158.5, 128.5, 126.0, 120.4, 113.0, 109.8, 69.3, 55.3, 52.1, 42.4, 30.9, 28.2, 28.2; <b>HRMS</b> (ESI) calculated for C<sub>16</sub>H<sub>19</sub>O<sub>3</sub> [M+H]<sup>+</sup>: 259.1334 found 259.1341.</p>                                                                                                                                                                                                                     |
|  <p style="text-align: center;"><b>12g</b></p>   | <p>Compound <b>12g</b>: 19.1 mg, 65% yield; white solid, mp 120-122 °C; purified using 10% ethyl acetate in hexanes as eluent; <b><sup>1</sup>H NMR</b> (CDCl<sub>3</sub>, 500 MHz) δ 8.29 (d, <i>J</i> = 8.0 Hz, 1H), 6.81 (d, <i>J</i> = 9.0 Hz, 1H), 5.23 (s, 1H), 3.83 (s, 1H), 2.35 (s, 1H), 2.32 (s, 1H); <b><sup>13</sup>C NMR</b> (CDCl<sub>3</sub>, 125 MHz) δ 196.2, 171.0, 153.8, 126.5, 124.6, 123.8, 121.5, 117.9, 111.1, 110.4, 66.3, 56.3, 56.2, 52.2, 42.4, 31.4, 28.1; <b>HRMS</b> (ESI-TOF) calculated for C<sub>16</sub>H<sub>17</sub>ClO<sub>3</sub> [M+H]<sup>+</sup>: 293.0944 found 293.0925.</p>                                                                                                                                                                                                                  |
|  <p style="text-align: center;"><b>12h</b></p>   | <p>Compound <b>12h</b>: 19.0 mg, 66% yield; light yellow oil; purified using 15% ethyl acetate in hexanes as eluent; <b><sup>1</sup>H NMR</b> (CDCl<sub>3</sub>, 500 MHz) δ 8.13 (s, 1H), 6.54 (s, 1H), 5.09 (s, 2H), 3.93 (s, 3H), 3.86 (s, 3H), 2.42 (s, 2H), 2.39 (s, 2H), 1.10 (s, 6H); <b><sup>13</sup>C NMR</b> (CDCl<sub>3</sub>, 125 MHz) δ 196.7, 171.4, 148.7, 147.8, 120.7, 118.7, 108.5, 107.1, 69.1, 56.0, 56.0, 52.2, 42.5, 31.5, 29.7, 28.2; <b>HRMS</b> (ESI-TOF) calculated for C<sub>17</sub>H<sub>21</sub>O<sub>4</sub> [M+H]<sup>+</sup>: 289.1440 found 289.1443.</p>                                                                                                                                                                                                                                                |
|  <p style="text-align: center;"><b>12i</b></p>  | <p>Compound <b>12i</b>: 30 mg, 70% yield; white solid, mp 125-127 °C; purified using 15% ethyl acetate in hexanes as eluent; <b><sup>1</sup>H NMR</b> (CDCl<sub>3</sub>, 500 MHz) δ 8.14 (s, 1H), 7.42 (d, <i>J</i> = 8.0 Hz, 1H) 7.36 (apt, <i>J</i> = 8.0 Hz, 1H), 7.30 (d, <i>J</i> = 8.0 Hz, 1H), 6.54 (s, 1H), 5.13 (s, 2H), 5.01 (s, 2H), 3.93 (s, 3H), 2.41 (s, 2H), 2.39 (s, 2H), 1.09 (s, 6H); <b><sup>13</sup>C NMR</b> (CDCl<sub>3</sub>, 125 MHz) δ 196.6, 171.6, 149.5, 146.8, 137.1, 128.5, 127.8, 127.2, 121.4, 118.7, 111.3, 110.2, 108.9, 71.3, 69.0, 56.0, 52.2, 42.3, 28.2; <b>HRMS</b> (ESI-TOF) calculated for C<sub>23</sub>H<sub>25</sub>O<sub>4</sub> [M+H]<sup>+</sup>: 365.1753 found 365.1748.</p>                                                                                                             |
|  <p style="text-align: center;"><b>12j</b></p> | <p>Compound <b>12j</b>: 30.9 mg, 75% yield; white solid, mp 102-104 °C; purified using 10% ethyl acetate in hexanes as eluent; <b><sup>1</sup>H NMR</b> (CDCl<sub>3</sub>, 500 MHz) δ 8.14 (s, 1H), 7.35 (m, 5H), 6.54 (s, 1H), 5.13 (s, 2H), 5.01 (s, 2H), 3.93 (s, 3H), 2.41 (s, 2H), 2.39 (s, 2H), 1.09 (s, 6H); <b><sup>13</sup>C NMR</b> (CDCl<sub>3</sub>, 125 MHz) δ 196.6, 171.6, 149.5, 146.8, 137.1, 128.5, 127.8, 127.2, 121.4, 118.7, 111.3, 110.2, 108.9, 71.3, 69.0, 56.0, 52.2, 42.3, 31.5, 28.2; <b>HRMS</b> (ESI) calculated for C<sub>27</sub>H<sub>25</sub>O<sub>4</sub> [M+H]<sup>+</sup>: 413.1753 found 413.1763.</p>                                                                                                                                                                                               |
|  <p style="text-align: center;"><b>12k</b></p> | <p>Compound <b>12k</b>: 20.4 mg, 75% yield; white solid, mp 155-157 °C; purified using 10% ethyl acetate in hexanes as eluent; <b><sup>1</sup>H NMR</b> (CDCl<sub>3</sub>, 500 MHz) δ 7.89 (s, 1H), 6.43 (s, 1H), 5.84 (s, 2H), 4.92 (s, 2H), 2.32 (s, 2H), 2.29 (s, 2H), 1.00 (s, 6H); <b><sup>13</sup>C NMR</b> (CDCl<sub>3</sub>, 125 MHz) δ 196.2, 171.4, 147.6, 146.1, 121.9, 120.1, 111.8, 106.1, 104.4, 101.0, 69.3, 52.1, 42.3, 31.4, 28.1; <b>HRMS</b> (ESI-TOF) calculated for C<sub>16</sub>H<sub>17</sub>O<sub>4</sub> [M+H]<sup>+</sup>: 273.1127 found 273.1131.</p>                                                                                                                                                                                                                                                        |
|  <p style="text-align: center;"><b>12l</b></p> | <p>Compound <b>12l</b>: 15.1 mg, 69% yield; off-white solid, mp 97-99 °C; purified using 10% ethyl acetate in hexanes as eluent; <b><sup>1</sup>H NMR</b> (CDCl<sub>3</sub>, 500 MHz) δ 8.32 (dd, <i>J</i> = 2.5, 6.5 Hz, 1H), 6.99 (dt, <i>J</i> = 6.5, 9.5 Hz, 1H), 6.73 (dd, <i>J</i> = 2.0, 9.0 Hz, 1H), 5.09 (s, 2H), 2.56 (apt, <i>J</i> = 5.5, 6.5 Hz, 2H), 2.53 (apt, <i>J</i> = 5.5, 8.0 Hz, 2H), 2.02-1.99 (m, 2H); <b><sup>13</sup>C NMR</b> (CDCl<sub>3</sub>, 125 MHz) δ 196.2, 173.3, 161.5 (d, <i>J</i><sub>C-F</sub> = 244.2 Hz), 129.0 (d, <i>J</i><sub>C-F</sub> = 6.6 Hz), 126.8 (d, <i>J</i><sub>C-F</sub> = 8.3 Hz), 123.8, 115.0 (d, <i>J</i><sub>C-F</sub> = 20.2 Hz), 112.4, 110.7 (d, <i>J</i><sub>C-F</sub> = 23.2 Hz), 68.8, 38.1, 28.7, 20.0.</p>                                                             |
|  <p style="text-align: center;"><b>12m</b></p> | <p>Compound <b>12m</b>: 16.0 mg, 65% yield; light yellow oil; purified using 7% ethyl acetate in hexanes as eluent; <b><sup>1</sup>H NMR</b> (CDCl<sub>3</sub>, 500 MHz) δ 8.33 (dd, <i>J</i> = 8.0, 5.5 Hz, 1H), 6.91 (dt, <i>J</i> = 3.0, 8.0 Hz, 1H), 6.65 (dd, <i>J</i> = 8.0, 2.5 Hz, 1H), 5.01 (s, 1H), 2.34 (s, 2H), 2.31 (s, 2H), 1.01 (s, 6H); <b><sup>13</sup>C NMR</b> (CDCl<sub>3</sub>, 125 MHz) δ 196.2, 171.8, 161.5 (d, <i>J</i><sub>C-F</sub> = 244.2 Hz), 128.8 (d, <i>J</i><sub>C-F</sub> = 8.2 Hz), 126.5 (d, <i>J</i><sub>C-F</sub> = 6.6 Hz), 123.7, 114.9 (d, <i>J</i><sub>C-F</sub> = 20.2 Hz), 111.1, 110.7 (d, <i>J</i><sub>C-F</sub> = 23.3 Hz), 68.8, 52.0, 42.3, 31.4, 28.1; <b>HRMS</b> (ESI-TOF) calculated for C<sub>15</sub>H<sub>16</sub>FO<sub>2</sub> [M+H]<sup>+</sup>: 247.1134 found 247.1128.</p> |

|                                                                                                                                   |                                                                                                                                                                                                                                                                                                                                                                                                                                                                                                                                                                                                                                                                                                                                                                                                                                                                                                                                                          |
|-----------------------------------------------------------------------------------------------------------------------------------|----------------------------------------------------------------------------------------------------------------------------------------------------------------------------------------------------------------------------------------------------------------------------------------------------------------------------------------------------------------------------------------------------------------------------------------------------------------------------------------------------------------------------------------------------------------------------------------------------------------------------------------------------------------------------------------------------------------------------------------------------------------------------------------------------------------------------------------------------------------------------------------------------------------------------------------------------------|
| 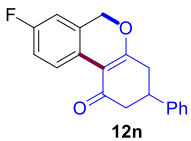 <p style="text-align: center;"><b>12n</b></p>   | <p>Compound <b>12n</b>: 18.3 mg, 62% yield; white solid, mp 180-182 °C; purified using 10% ethyl acetate in hexanes as eluent; <b><sup>1</sup>H NMR</b> (CDCl<sub>3</sub>, 500 MHz) δ 8.31 (dd, <i>J</i> = 6.5 Hz, 1H), 7.28 (apt, <i>J</i> = 8.0 Hz, 2H), 7.20 (apt, <i>J</i> = 9.5 Hz, 3H), 6.95 (dt, <i>J</i> = 7.5 Hz, 1H), 6.69 (dd, <i>J</i> = 2.5, 8.0 Hz, 1H), 5.07 (ABq, <i>J</i> = 13.5 Hz, 2H), 3.37-3.28 (m, 1H), 2.79-2.67 (m, 4H); <b><sup>13</sup>C NMR</b> (CDCl<sub>3</sub>, 125 MHz) δ 195.4, 172.4, 161.9 (d, <i>J</i><sub>C-F</sub> = 246.1 Hz), 142.2, 128.9 (d, <i>J</i><sub>C-F</sub> = 6.7 Hz), 128.8, 127.1, 126.8 (d, <i>J</i><sub>C-F</sub> = 6.6 Hz), 126.6, 123.6, 115.1 (d, <i>J</i><sub>C-F</sub> = 21.6 Hz), 112.2, 110.8 (d, <i>J</i><sub>C-F</sub> = 23.3 Hz), 69.0, 45.1, 38.1, 36.2; <b>HRMS</b> (ESI-TOF) calculated for C<sub>19</sub>H<sub>16</sub>FO<sub>2</sub> [M+H]<sup>+</sup>: 295.1134 found 295.1149.</p> |
|  <p style="text-align: center;"><b>12o</b></p>   | <p>Compound <b>12o</b>: 23.5 mg, 72% yield; yellow solid, mp 205-207 °C; purified using 10% ethyl acetate in hexanes as eluent <b><sup>1</sup>H NMR</b> (CDCl<sub>3</sub>, 500 MHz) δ 8.47 (d, <i>J</i> = 9.5 Hz, 1H), 7.75 (apt, <i>J</i> = 9.5 Hz, 2H), 7.63 (d, <i>J</i> = 8.0 Hz, 1H), 7.42 (apt, <i>J</i> = 8.0 Hz, 1H), 7.36 (apt, <i>J</i> = 8.0 Hz, 1H), 7.28 (apt, <i>J</i> = 8.0 Hz, 2H), 7.22-7.16 (m, 3H), 5.61 (ABq, <i>J</i> = 13.5 Hz, 2H), 3.39-3.32 (m, 1H), 2.75 (m, 4H); <b><sup>13</sup>C NMR</b> (CDCl<sub>3</sub>, 125 MHz) δ 195.3, 173.2, 142.4, 132.7, 128.8, 128.7, 128.3, 128.0, 127.1, 126.6, 126.4, 125.5, 125.3, 123.2, 121.6, 120.5, 112.8, 66.5, 45.3, 38.1, 36.3; <b>HRMS</b> (ESI-TOF) calculated for C<sub>23</sub>H<sub>19</sub>O<sub>2</sub> [M+H]<sup>+</sup>: 327.1385 found 327.1381.</p>                                                                                                                        |
|  <p style="text-align: center;"><b>12p</b></p>   | <p>Compound <b>12p</b>: 20.6 mg, 74% yield; orange solid, mp 107-109 °C; purified using 10% ethyl acetate in hexanes as eluent; <b><sup>1</sup>H NMR</b> (CDCl<sub>3</sub>, 500 MHz) δ 8.59 (d, <i>J</i> = 8.0 Hz, 1H), 7.83 (d, <i>J</i> = 8.0 Hz, 1H), 7.81 (d, <i>J</i> = 9.0 Hz, 1H), 7.72 (d, <i>J</i> = 8.0 Hz, 1H), 7.49 (apt, <i>J</i> = 8.0 Hz, 1H), 7.43 (apt, <i>J</i> = 8.0 Hz, 1H), 5.66 (s, 2H), 2.50 (s, 2H), 2.44 (s, 2H), 1.13 (s, 6H); <b><sup>13</sup>C NMR</b> (CDCl<sub>3</sub>, 125 MHz) δ 196.2, 172.6, 132.6, 128.6, 128.3, 127.9, 126.3, 125.1, 123.1, 121.6, 120.3, 111.8, 66.2, 52.2, 42.5, 31.5, 28.2; <b>HRMS</b> (ESI-TOF) calculated for C<sub>19</sub>H<sub>19</sub>O<sub>2</sub> [M+H]<sup>+</sup>: 279.1385 found 279.1393.</p>                                                                                                                                                                                        |
|  <p style="text-align: center;"><b>12q</b></p>  | <p>Compound <b>12q</b>: 24.2 mg, 68% yield; light yellow solid, mp 150-160 °C; purified using 15% ethyl acetate in hexanes as eluent; <b><sup>1</sup>H NMR</b> (CDCl<sub>3</sub>, 500 MHz) δ 7.71 (d, <i>J</i> = 9.5 Hz, 1H), 7.69 (d, <i>J</i> = 9.5 Hz, 1H), 7.38 (apt, 2H, <i>J</i> = 8.0 Hz), 7.31 (m, 3H), 7.18 (d, <i>J</i> = 8.0 Hz, 1H), 7.14 (d, <i>J</i> = 3.0 Hz, 1H), 7.11 (d, <i>J</i> = 3.0 Hz, 1H), 5.20 (ABq, <i>J</i> = 12.0 Hz, 2H), 3.92 (s, 3H), 3.56 (m, 1H), 2.91 (m, 4H); <b><sup>13</sup>C NMR</b> (CDCl<sub>3</sub>, 125 MHz) δ 193.8, 175.9, 157.3, 142.1, 135.8, 128.8, 128.8, 127.3, 127.1, 126.8, 125.1, 124.0, 123.2, 122.5, 118.0, 117.3, 106.2, 71.4, 55.3, 44.7, 37.4, 36.4; <b>HRMS</b> (ESI-TOF) calculated for C<sub>24</sub>H<sub>21</sub>O<sub>3</sub> [M+H]<sup>+</sup>: 357.1490 found 357.1478.</p>                                                                                                             |
|  <p style="text-align: center;"><b>12r</b></p> | <p>Compound <b>12r</b>: 19.8 mg, 64% yield; light brown solid, mp 115-117 °C; purified using 15% ethyl acetate in hexanes as eluent; <b><sup>1</sup>H NMR</b> (CDCl<sub>3</sub>, 500 MHz) δ 7.66 (d, <i>J</i> = 9.0 Hz, 2H), 7.17 (d, <i>J</i> = 8.0 Hz, 1H), 7.11 (m, 2H), 5.13 (s, 2H), 3.91 (s, 3H), 2.55 (s, 4H), 1.23 (s, 6H); <b><sup>13</sup>C NMR</b> (CDCl<sub>3</sub>, 125 MHz) δ 194.7, 175.0, 157, 135.8, 128.8, 127.0, 125.1, 123.3, 122.5, 117.9, 116.6, 71.2, 55.2, 51.5, 42.2, 30.1, 28.3; <b>HRMS</b> (ESI-TOF) calculated for C<sub>20</sub>H<sub>21</sub>O<sub>3</sub> [M+H]<sup>+</sup>: 309.1490 found 309.1487.</p>                                                                                                                                                                                                                                                                                                                |
|  <p style="text-align: center;"><b>12s</b></p> | <p>Compound <b>12s</b>: 18.9 mg, 78% yield; white solid, mp 198-200 °C; purified using 15% ethyl acetate in hexanes as eluent; <b><sup>1</sup>H NMR</b> (CDCl<sub>3</sub>, 500 MHz) δ 8.35 (d, <i>J</i> = 8.0 Hz, 1H), 7.31 (apt, <i>J</i> = 8.0 Hz, 1H), 7.22 (apt, <i>J</i> = 8.0 Hz, 1H), 7.03 (d, <i>J</i> = 7.5 Hz, 1H), 5.29 (q, <i>J</i> = 8.0 Hz, 1H), 2.54 (m, 4H), 2.00 (m, 2H), 1.61 (d, <i>J</i> = 6.5 Hz, 3H); <b><sup>13</sup>C NMR</b> (CDCl<sub>3</sub>, 125 MHz) δ 196.3, 172.7, 131.5, 128.1, 127.0, 124.9, 123, 112.3, 75.5, 38.4, 29.7, 29.4, 20.1; <b>HRMS</b> (ESI-TOF) calculated for C<sub>16</sub>H<sub>19</sub>O<sub>2</sub> [M+H]<sup>+</sup>: 243.1385 found 243.1388.</p>                                                                                                                                                                                                                                                   |
|  <p style="text-align: center;"><b>12t</b></p> | <p>Compound <b>12t</b>: 22.3 mg, 75% yield; yellow solid, mp 110-115 °C; purified using 5% ethyl acetate in hexanes as eluent; <b><sup>1</sup>H NMR</b> (CDCl<sub>3</sub>, 500 MHz) δ 8.55 (d, <i>J</i> = 8.0 Hz, 1H), 7.36 (apt, <i>J</i> = 8.0 Hz, 1H), 7.21 (apt, <i>J</i> = 8.0 Hz, 1H), 7.06 (d, <i>J</i> = 8.0 Hz, 1H), 5.48 (dd, <i>J</i> = 6.5, 8.0 Hz, 1H), 2.49-2.29 (m, 4H), 1.07 (s, 3H), 1.02 (s, 3H); <b><sup>13</sup>C NMR</b> (CDCl<sub>3</sub>, 125 MHz) δ 196.3, 169.3, 130.3, 127.3, 127.1, 126.5, 125.3, 123.0 (q, <i>J</i><sub>C-F</sub> = 284 Hz), 120.3, 110.4, 75.4 (q, <i>J</i><sub>C-F</sub> = 33.1 Hz), 52.4, 42.4, 29.7, 28.8, 27.4; <b>HRMS</b> (ESI-TOF) calculated for C<sub>16</sub>H<sub>16</sub>F<sub>3</sub>O<sub>2</sub> [M+H]<sup>+</sup>: 297.1102 found 297.1112.</p>                                                                                                                                             |
|  <p style="text-align: center;"><b>12u</b></p> | <p>Compound <b>12u</b>: 18.8 mg, 66% yield; yellow solid, mp 110-115 °C; purified using 5% ethyl acetate in hexanes as eluent; <b><sup>1</sup>H NMR</b> (CDCl<sub>3</sub>, 500 MHz) δ 7.79 (d, <i>J</i> = 8.0 Hz, 1H), 7.34 (d, <i>J</i> = 8.0 Hz, 1H), 7.27 (apt, <i>J</i> = 8.0 Hz, 1H), 7.21 (apt, <i>J</i> = 8.0 Hz, 1H), 5.63 (s, 2H), 2.39 (s, 2H), 2.32 (s, 2H), 1.05 (s, 6H); <b><sup>13</sup>C NMR</b> (CDCl<sub>3</sub>, 125 MHz) δ 193.9, 170.8, 141.1, 134.6, 127.2, 124.2, 123.6, 122.7, 119.4, 117.1, 108.7, 68.2, 50.1, 42.0, 32.3, 28.4; <b>HRMS</b> (ESI-TOF) calculated for C<sub>17</sub>H<sub>17</sub>O<sub>2</sub>S [M+H]<sup>+</sup>: 285.0949 found 285.0957.</p>                                                                                                                                                                                                                                                                 |



## References:

1. (a) Zhou, F.; Zhou, L.; Jing, P.; Sun, M.; Deng, G.; Liang, Y.; Yang, Y. *Org. Lett.* **2022**, *24*, 1400-1404; (b) Kong, H.-H.; Zhu, C.; Deng, S.; Xu, G.; Zhao, R.; Yao, C.; Xiang, H.-M.; Zhao, C.; Qi, X.; Xu, H. *J. Am. Chem. Soc.* **2022**, *144*, 21347-21355; (c) Nitti, A.; Osw, P.; Calcagno, G.; Botta, C.; Etkind, S. I.; Bianchi, G.; Po, R.; Swager, T. M.; Pasini, D. *Org. Lett.* **2020**, *22*, 3263-3267.
2. (a) Ning, X.; Chen, Y.; Hu, F.; Xia, Y. *Org. Lett.* **2021**, *23*, 8348-8352; (b) Li, X.; Song, J.-N.; Karmakar, S.; Lu, Y.; Lv, Y.; Liao, P.; Liu, Z. *Chem. Commun.* **2022**, *58*, 13783-13786.
3. (a) Muimhneachain, E.O.; Pardo, L. M.; Bateman, L.M.; Rao Khandavilli, U. B.; Lawrence, S. E.; McGlacken, G. P. *Adv. Synth. Catal.* **2017**, *359*, 1529-1534; (b) Mao, Z.; Zhu, X.; Wan, Y. *Catal. Lett.* **2015**, *145*, 1612-1620; (c) Sudheendran, K.; Malakar, C.C.; Conrad, J.; Beifuss, U. *J. Org. Chem.* **2012**, *77*, 10194-10210.

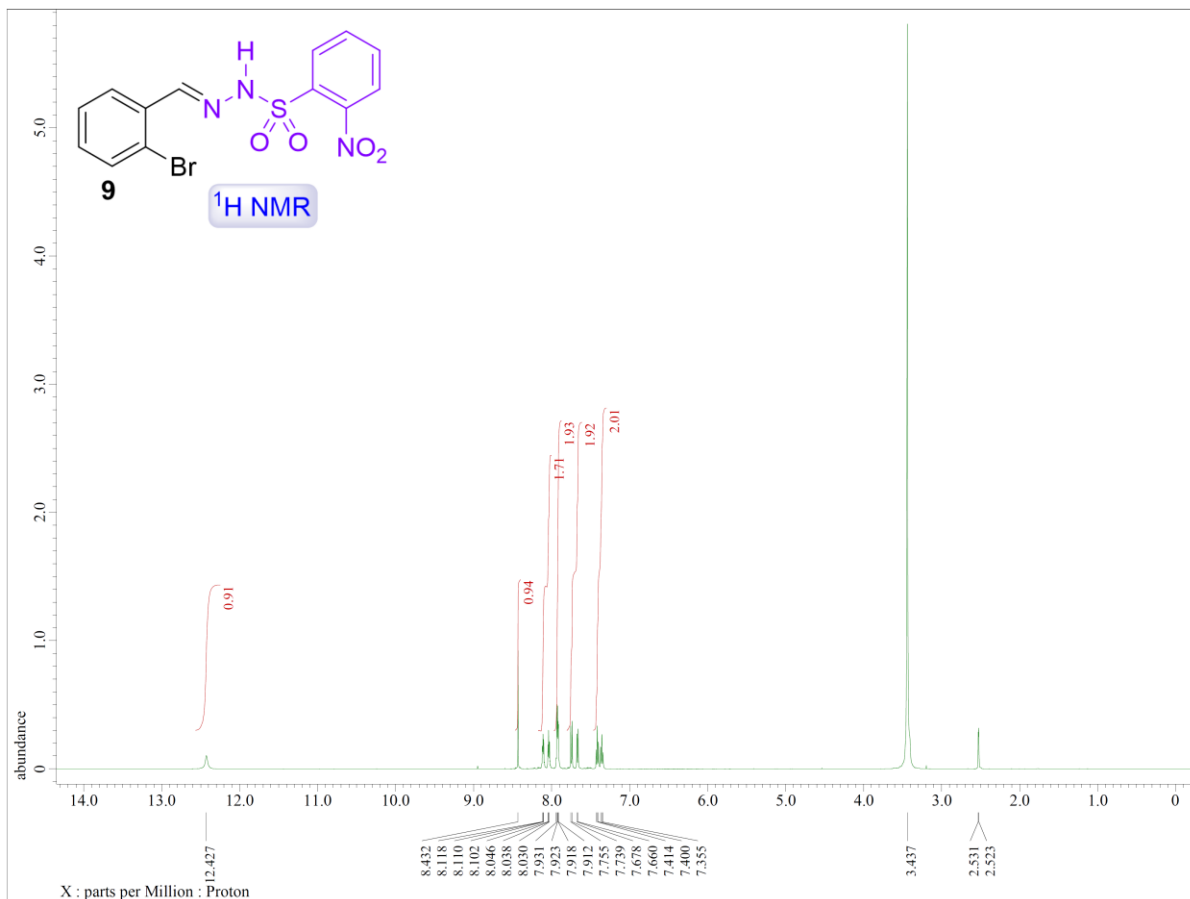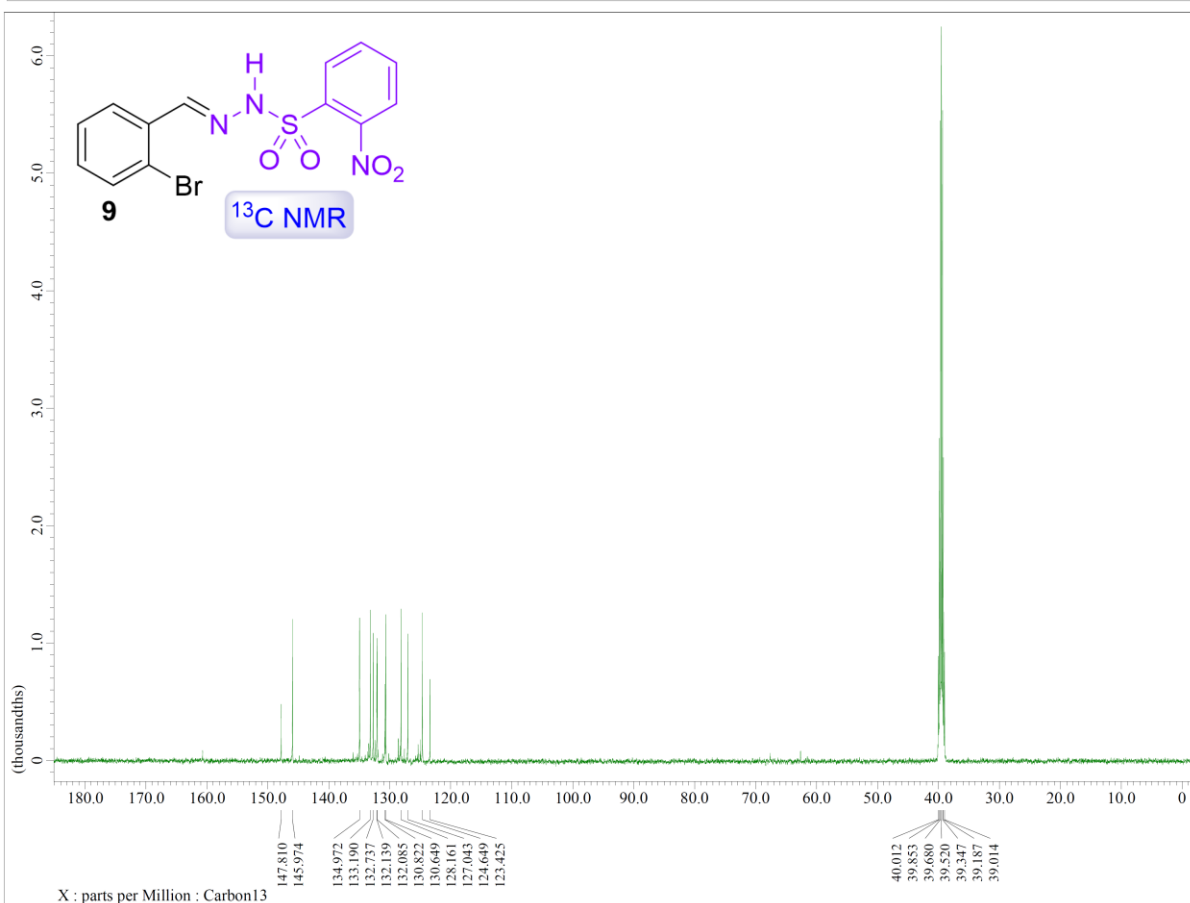

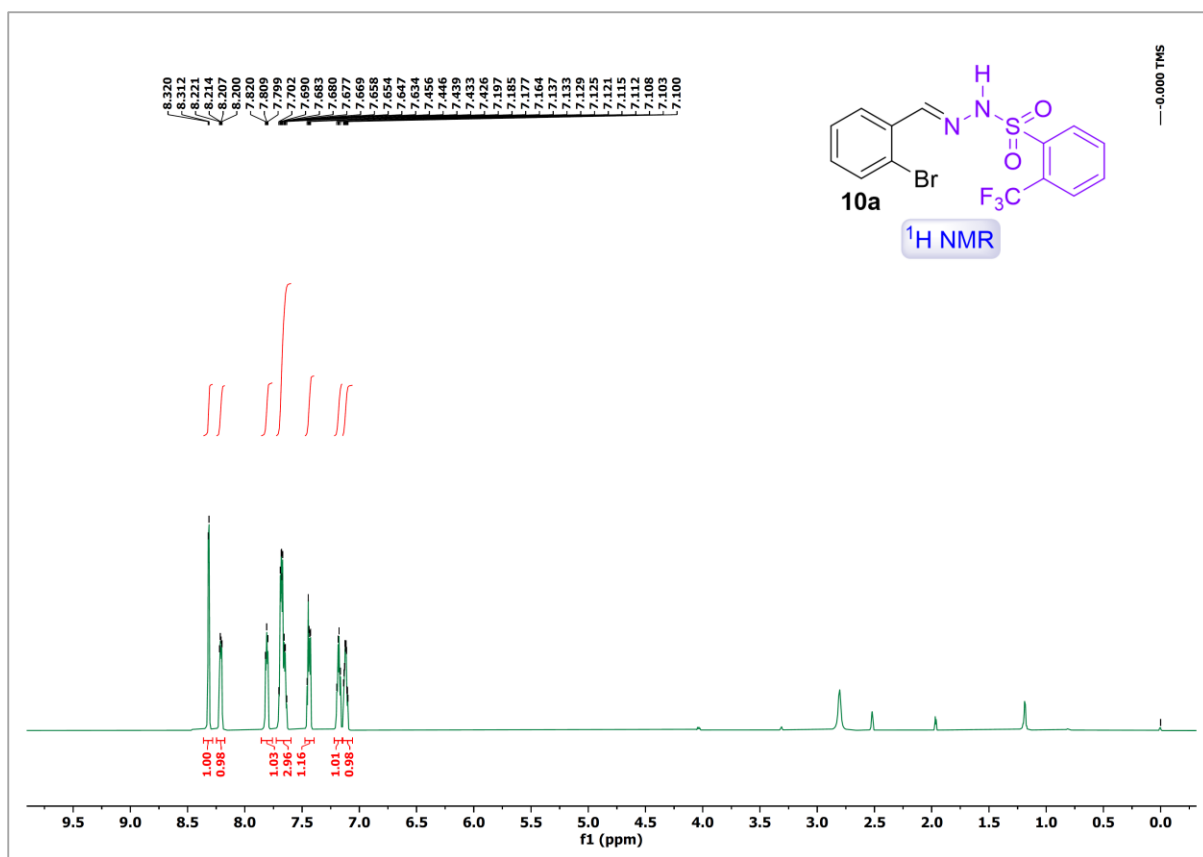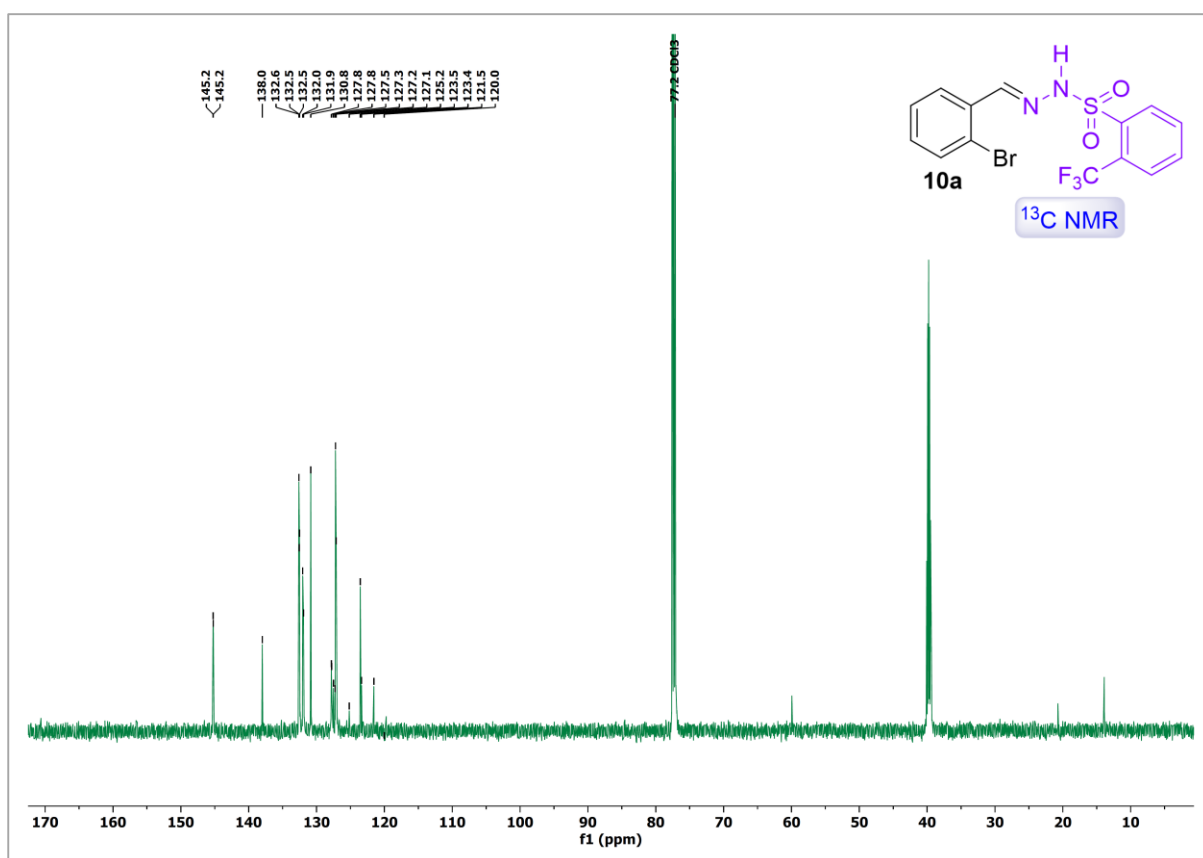

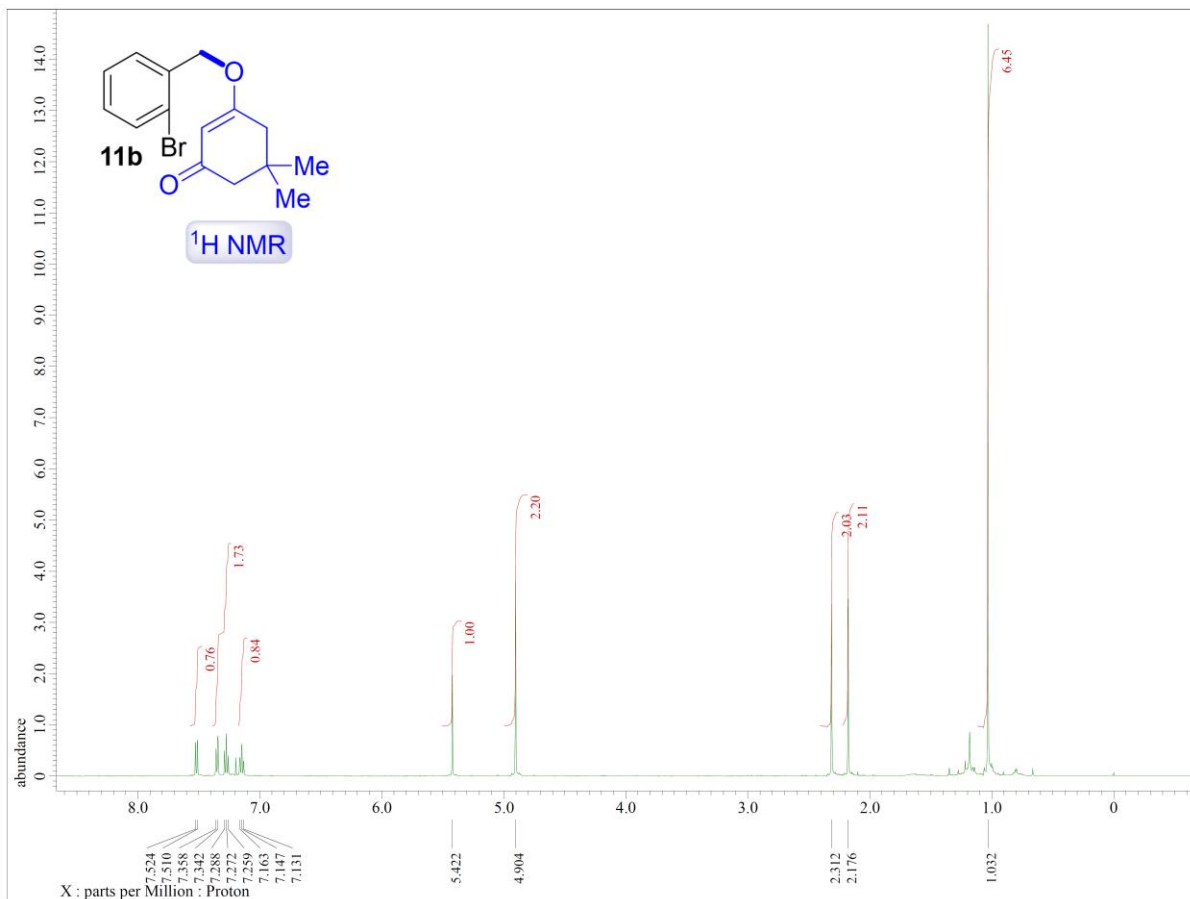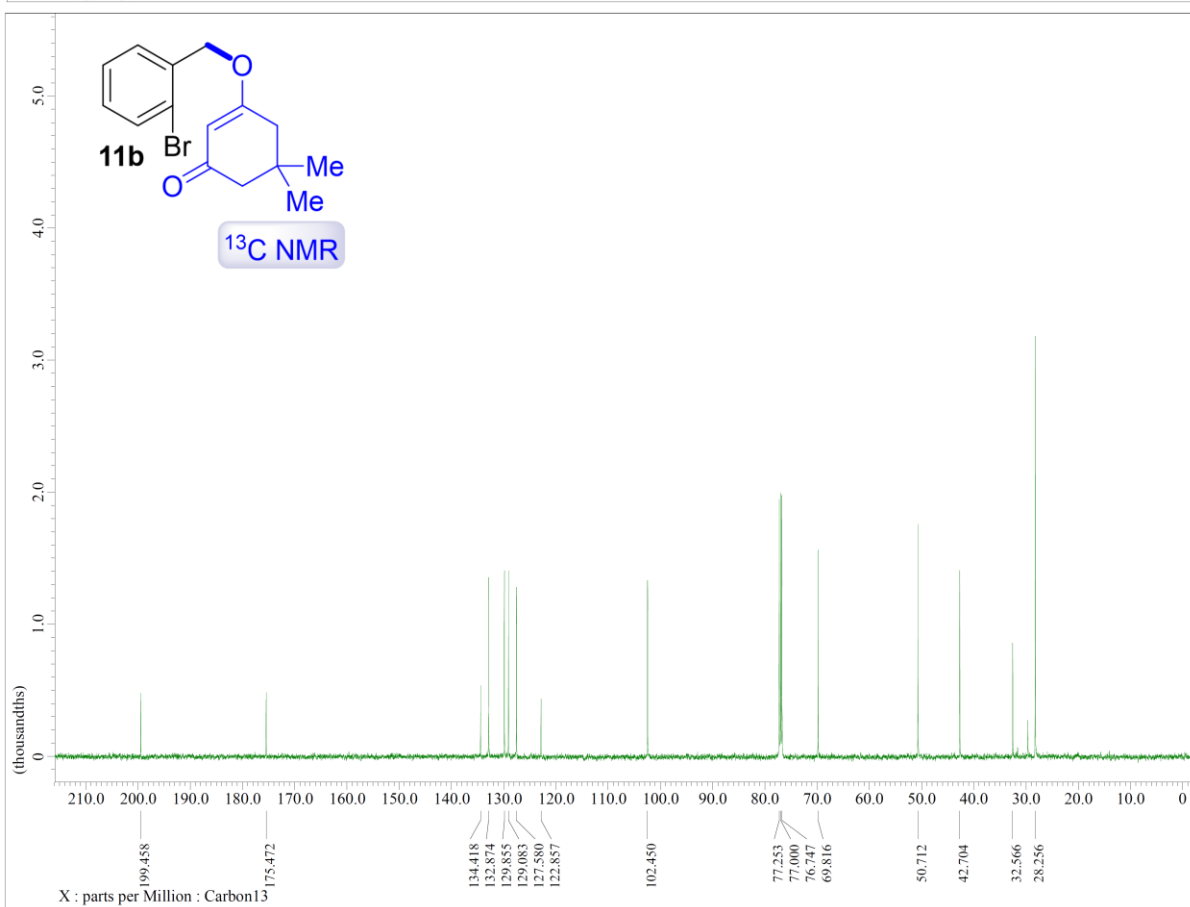

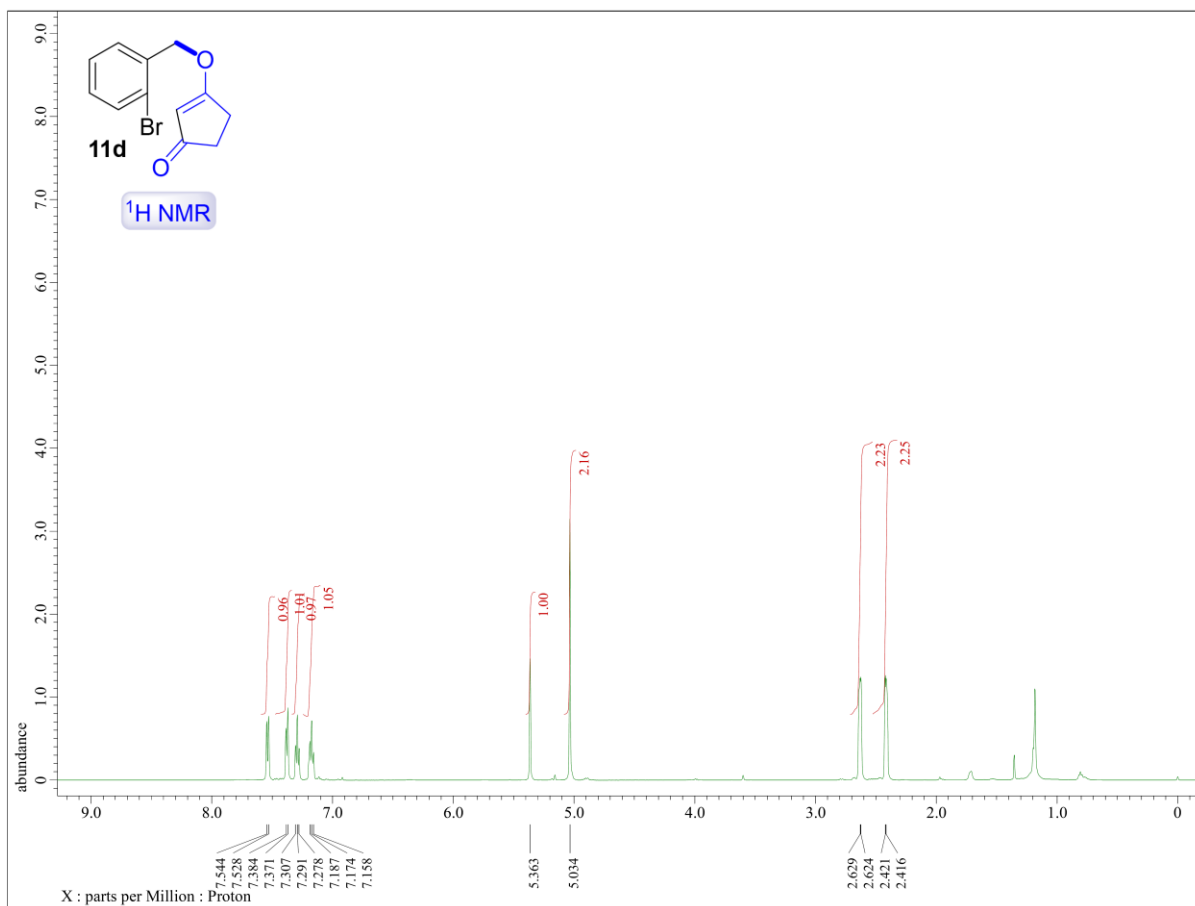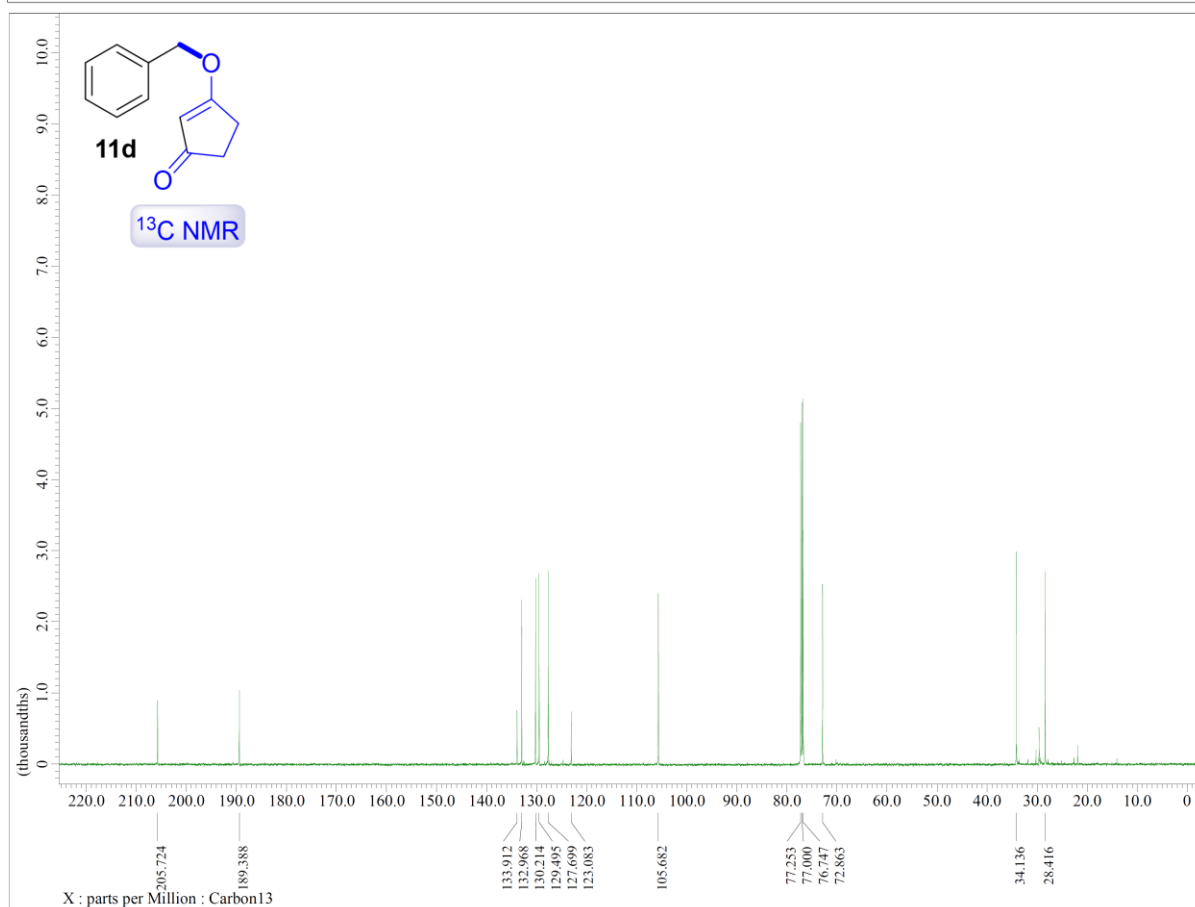

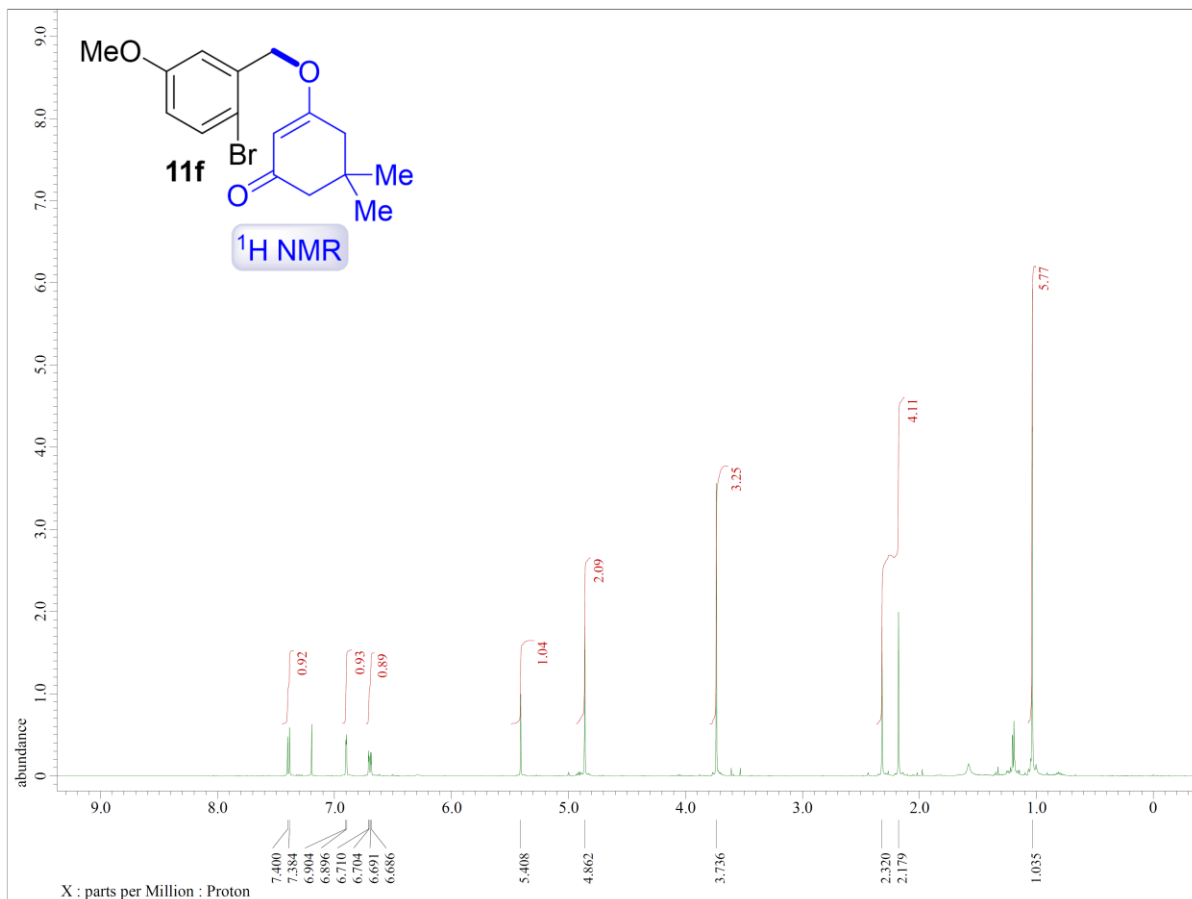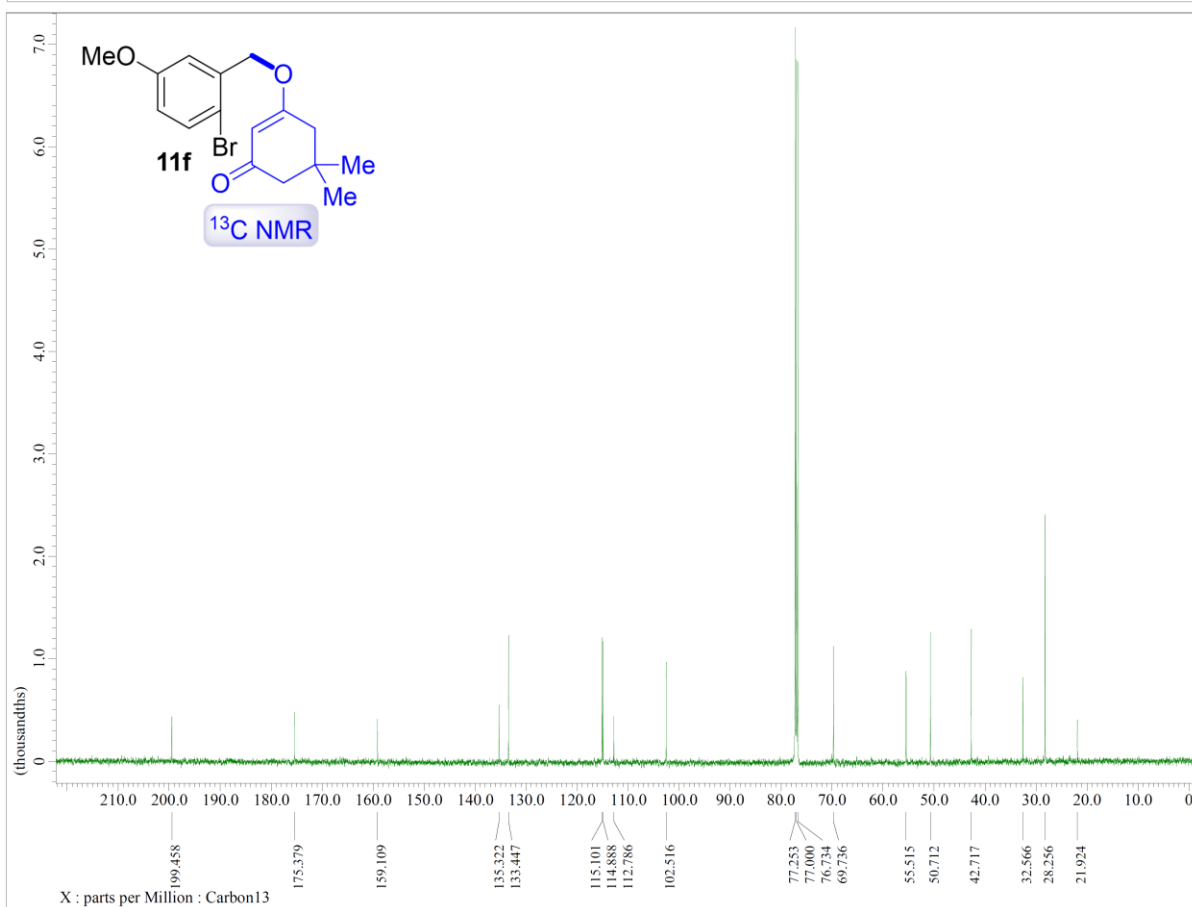

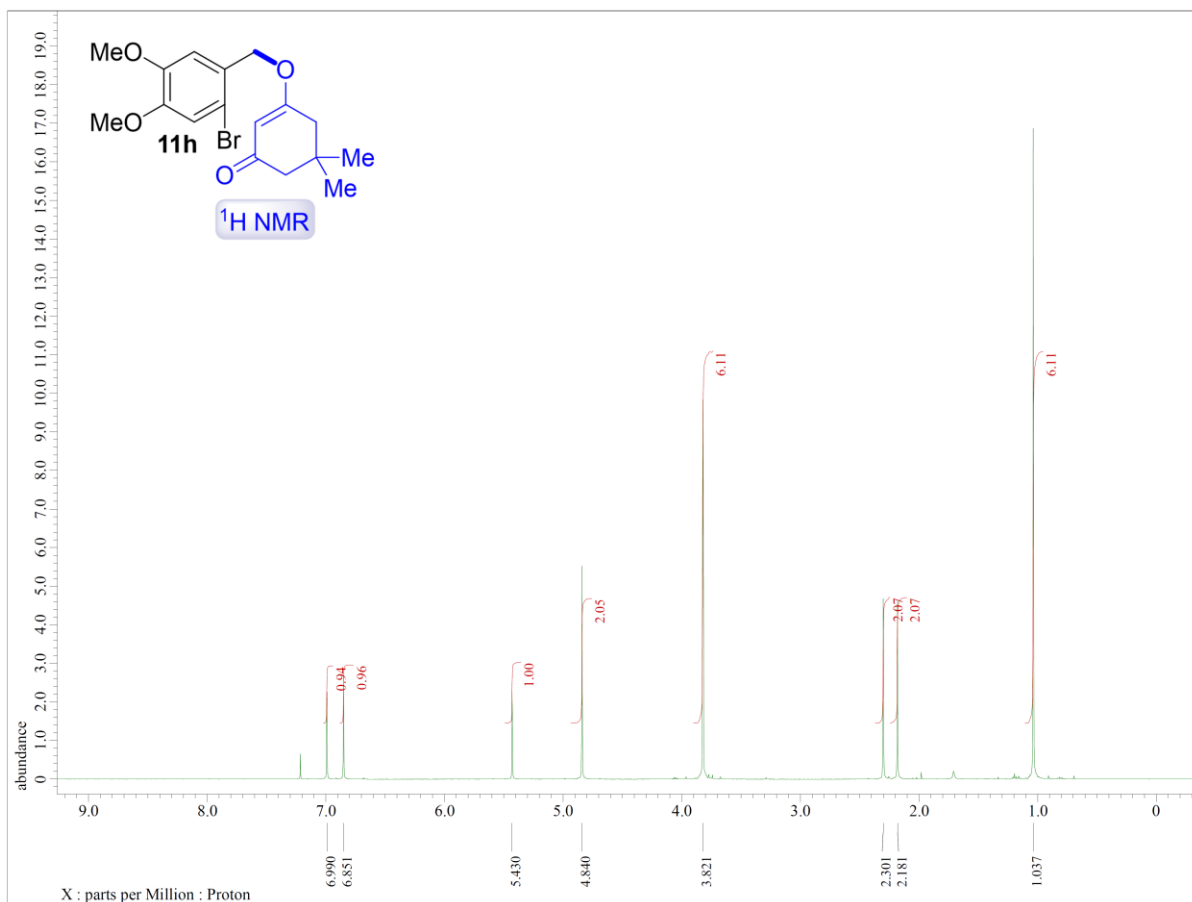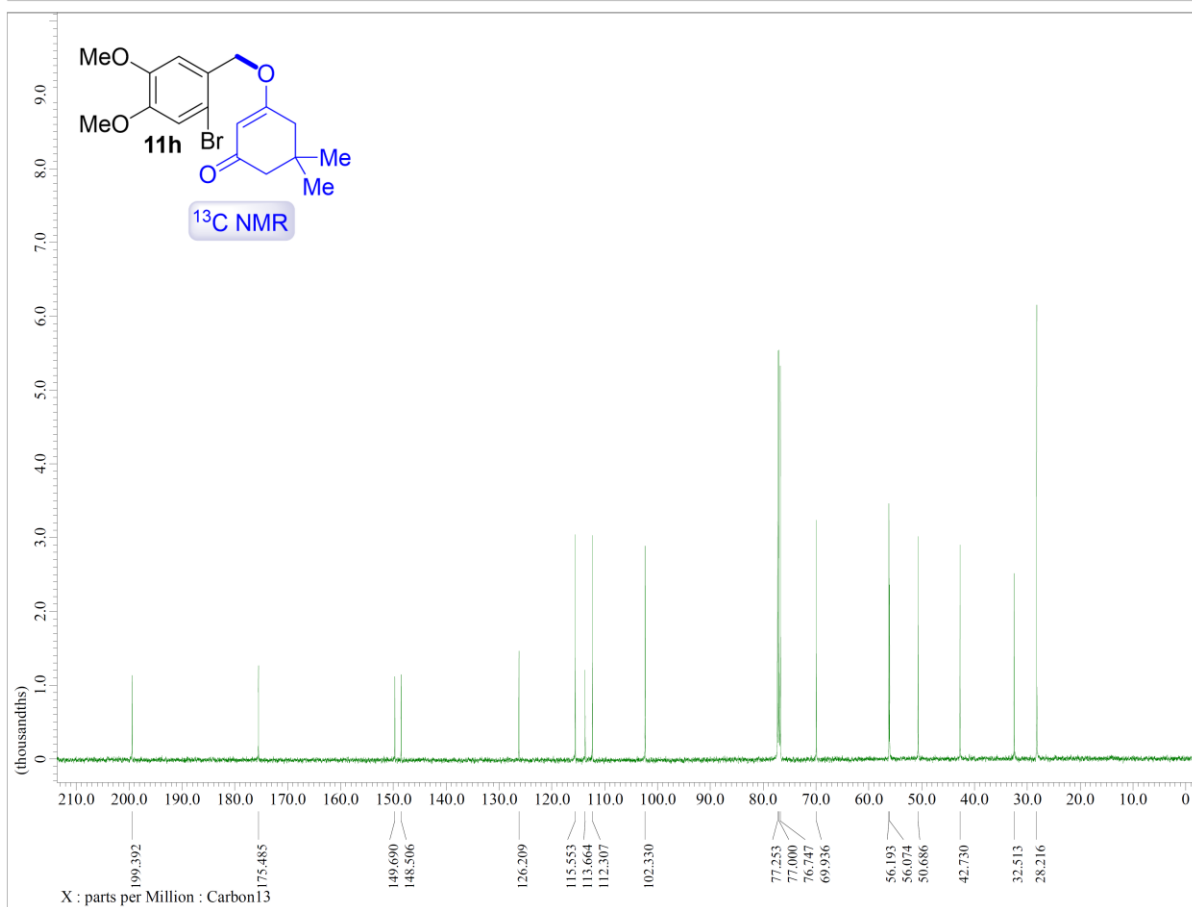

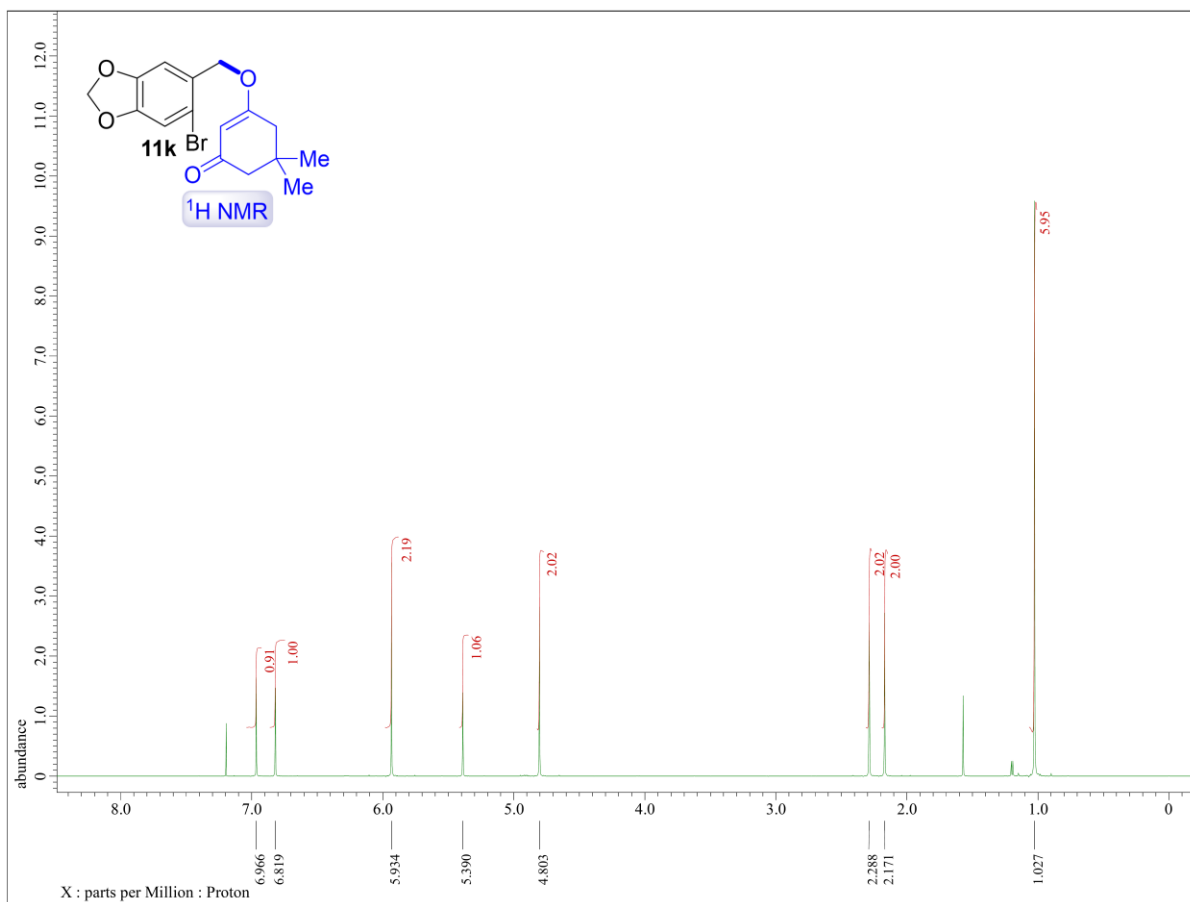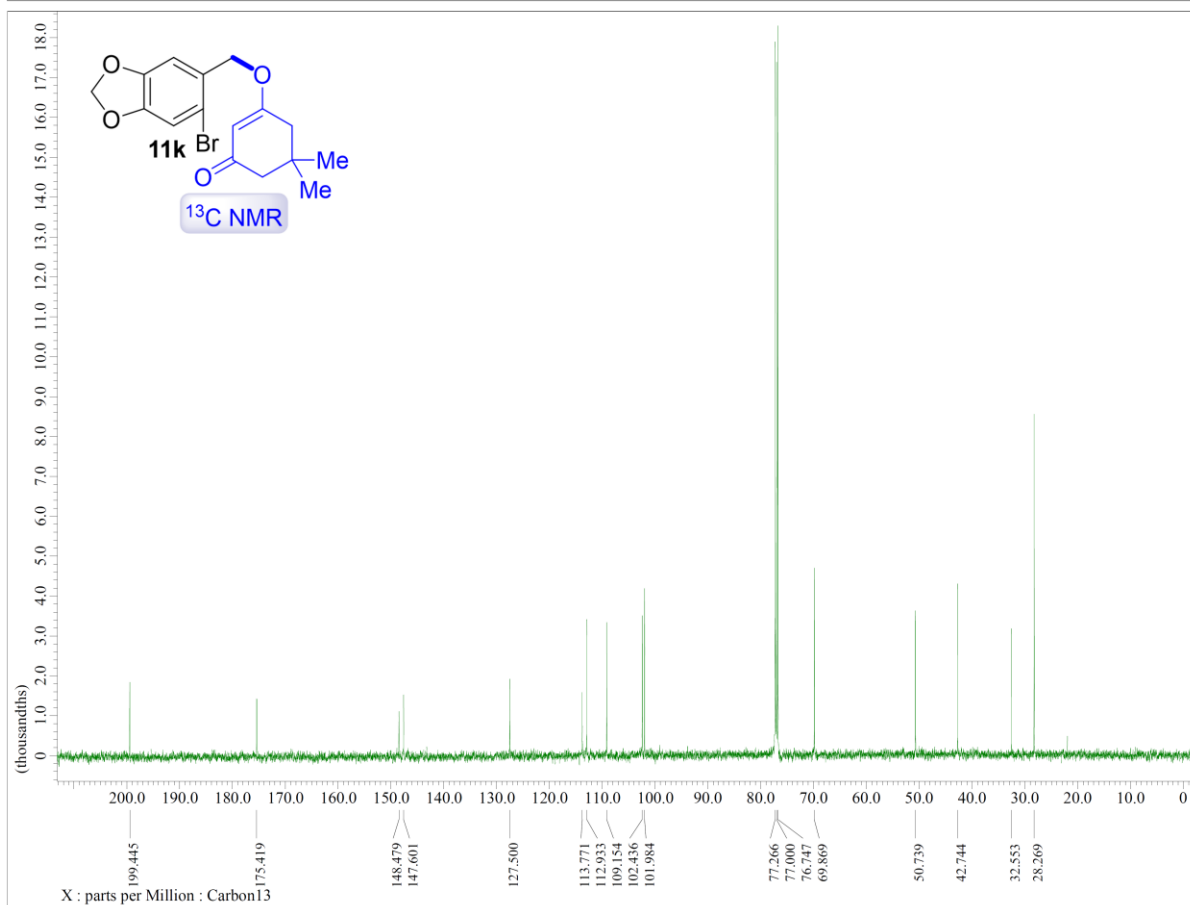



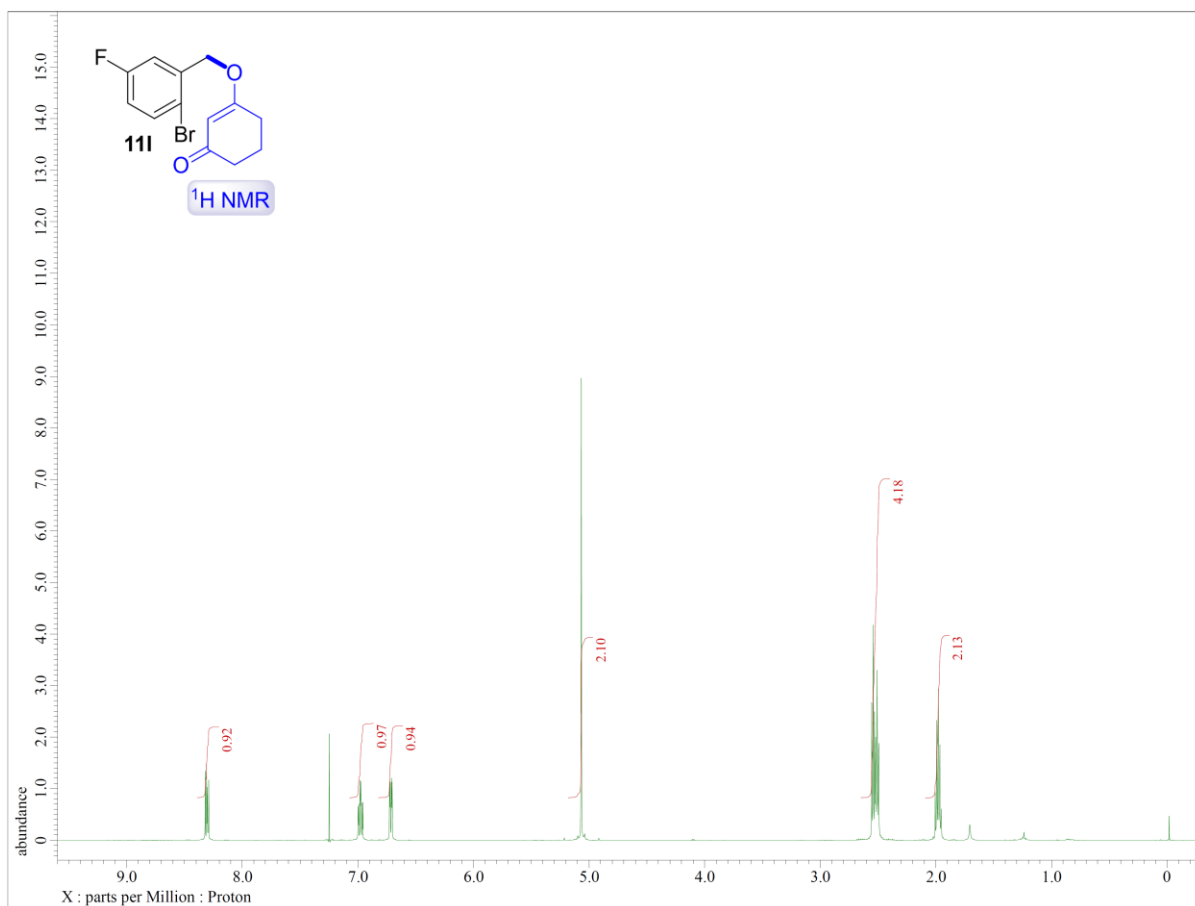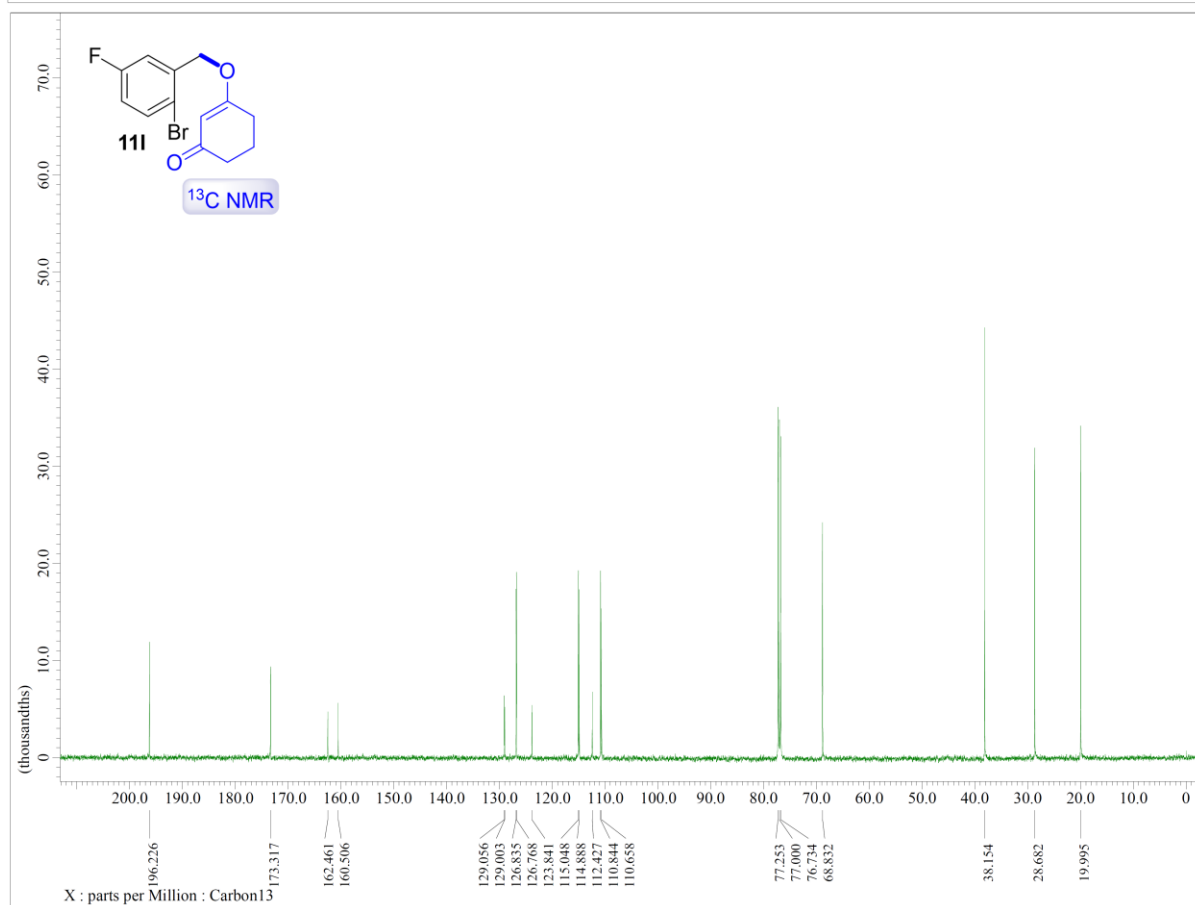

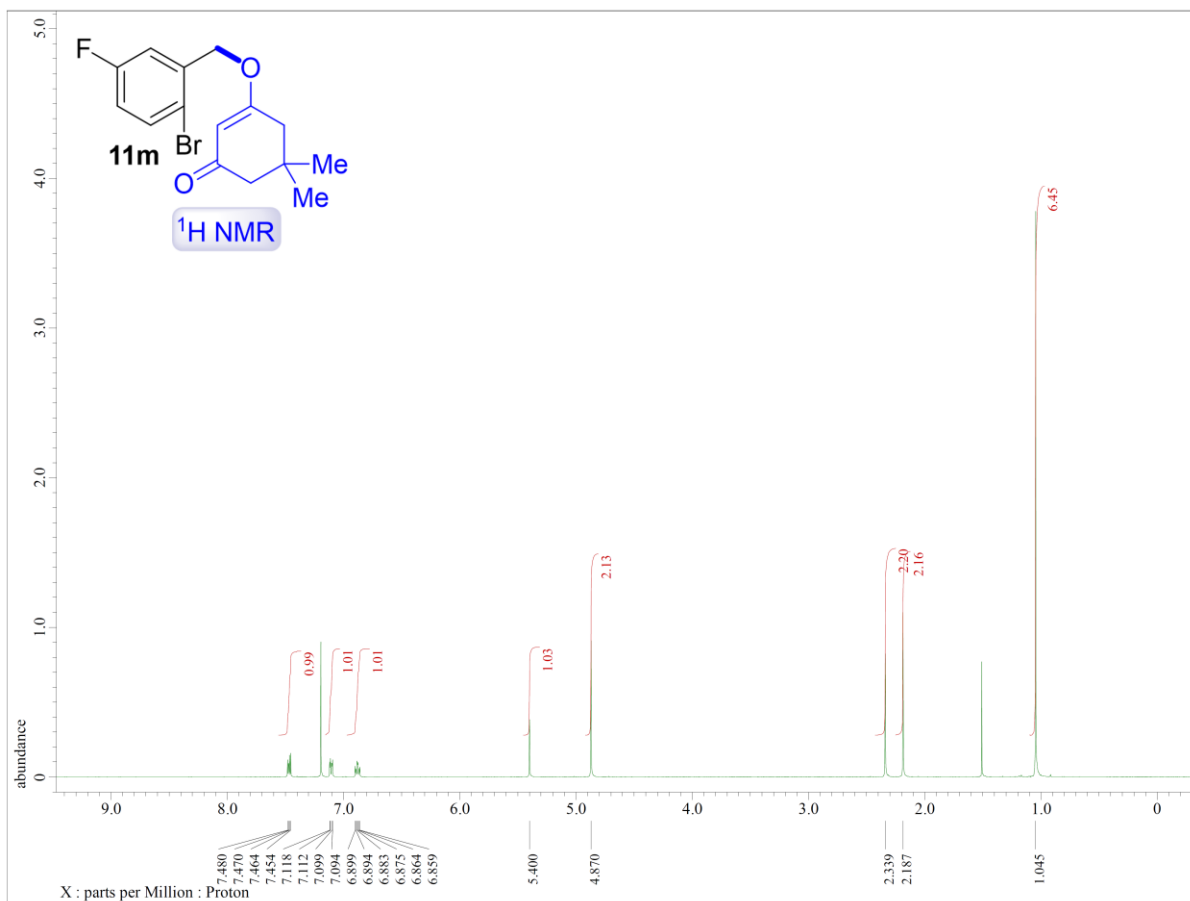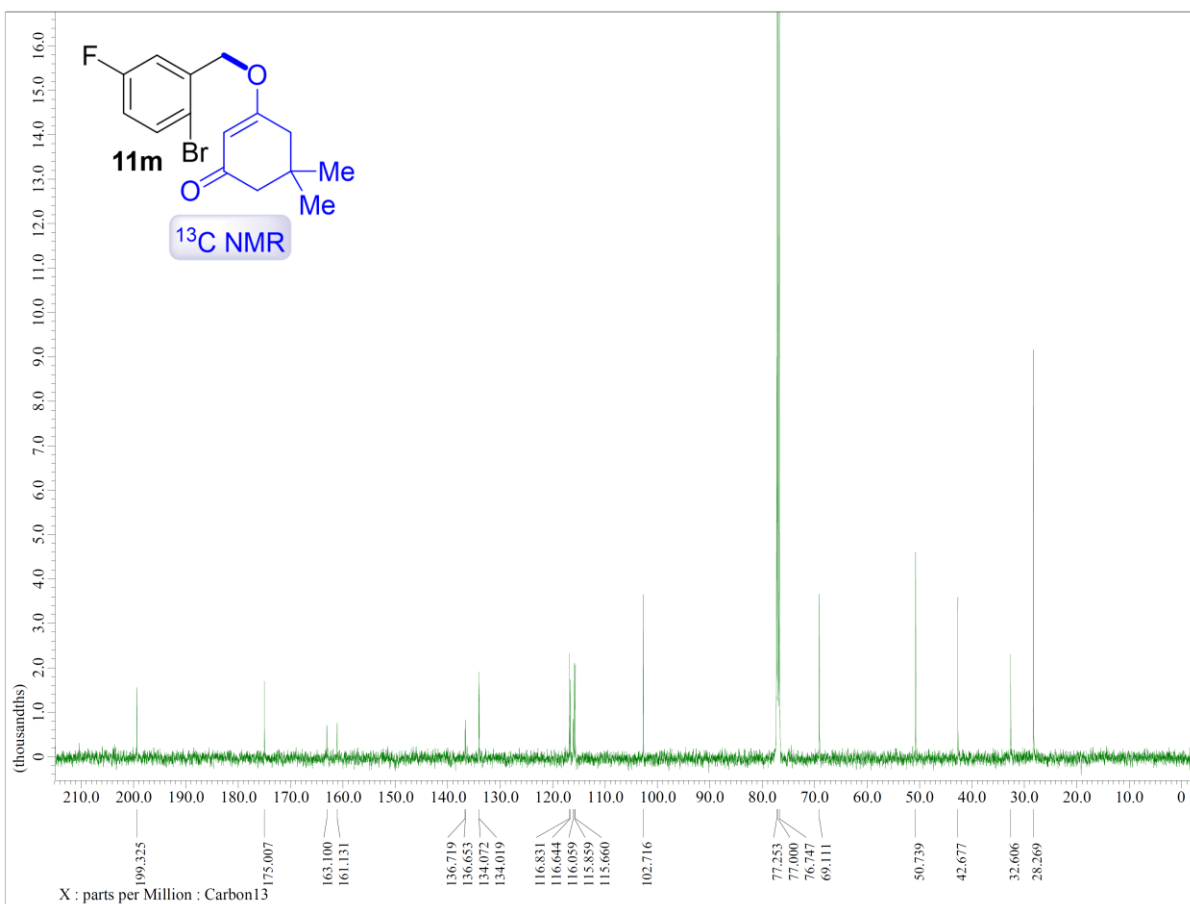

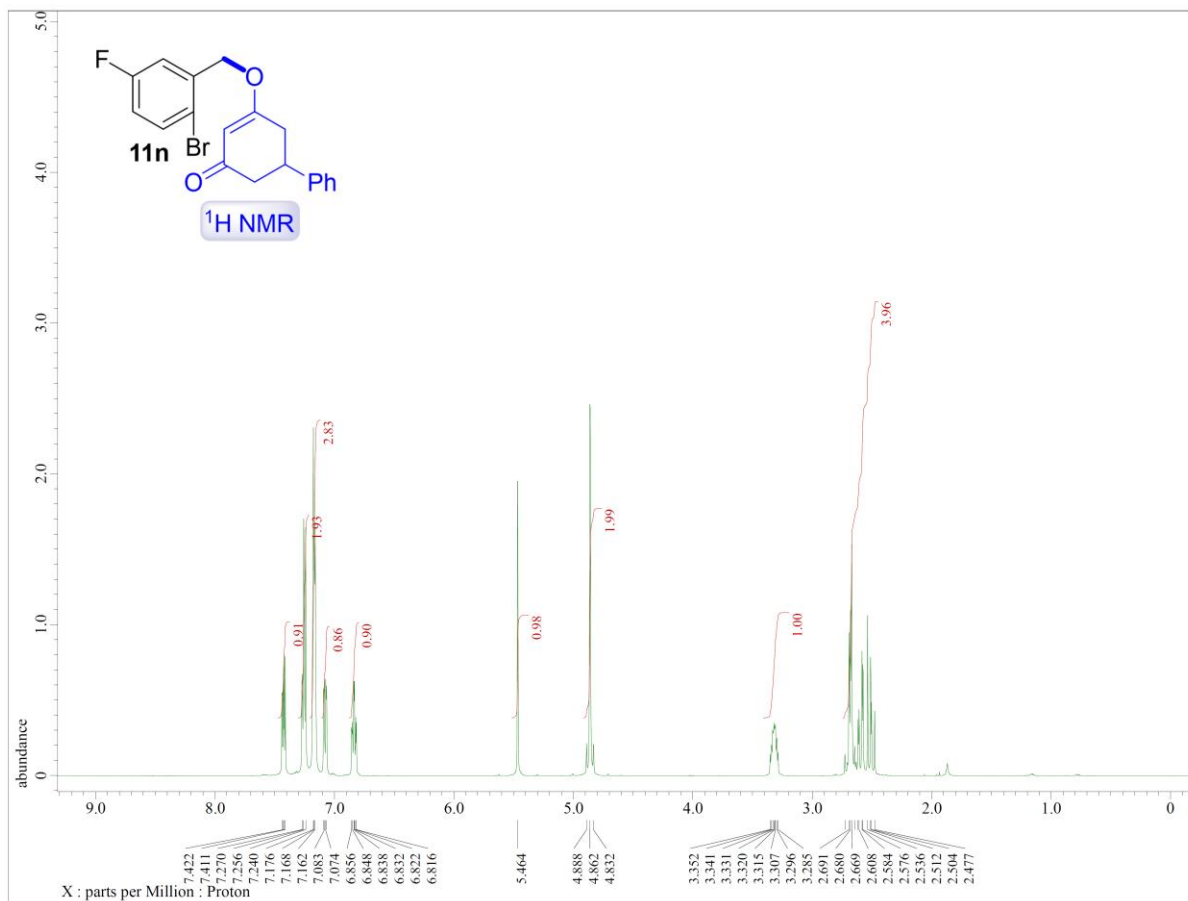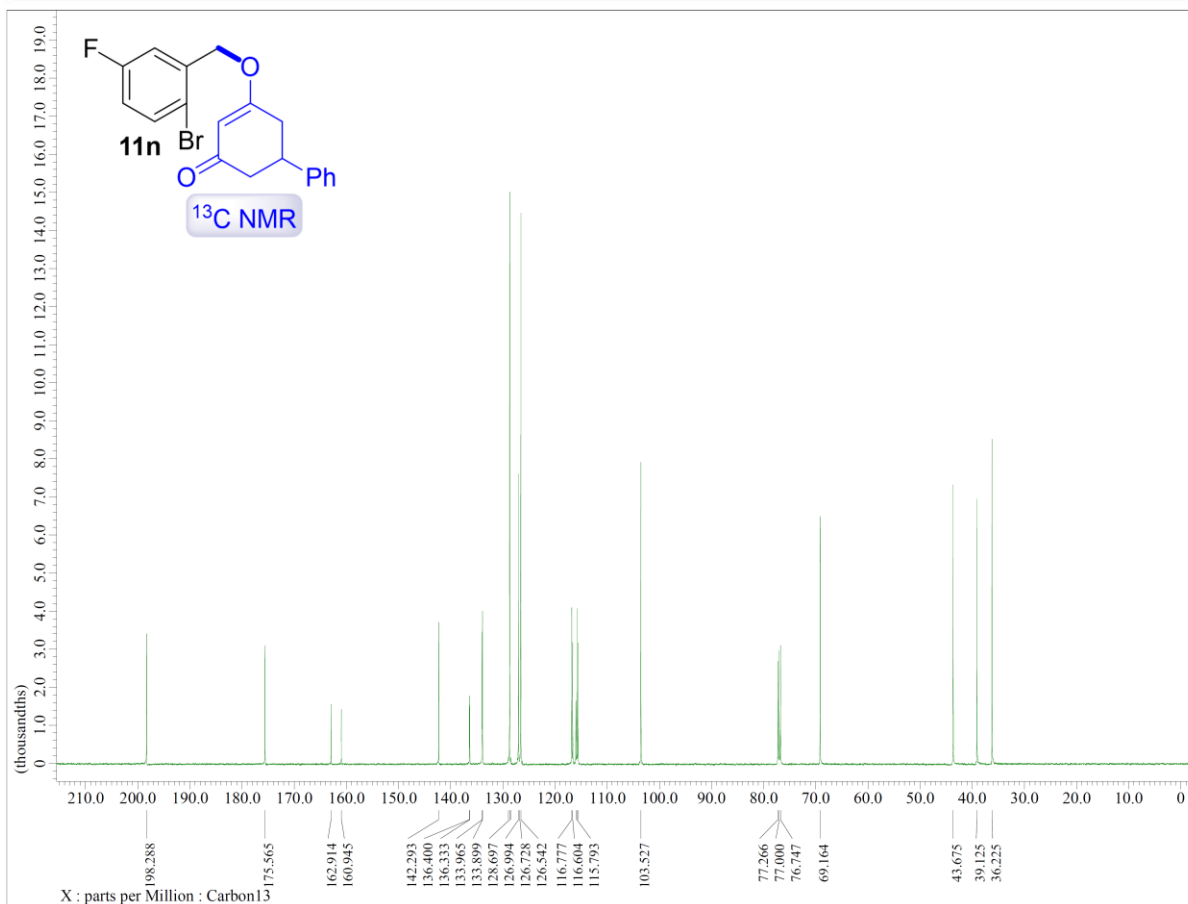

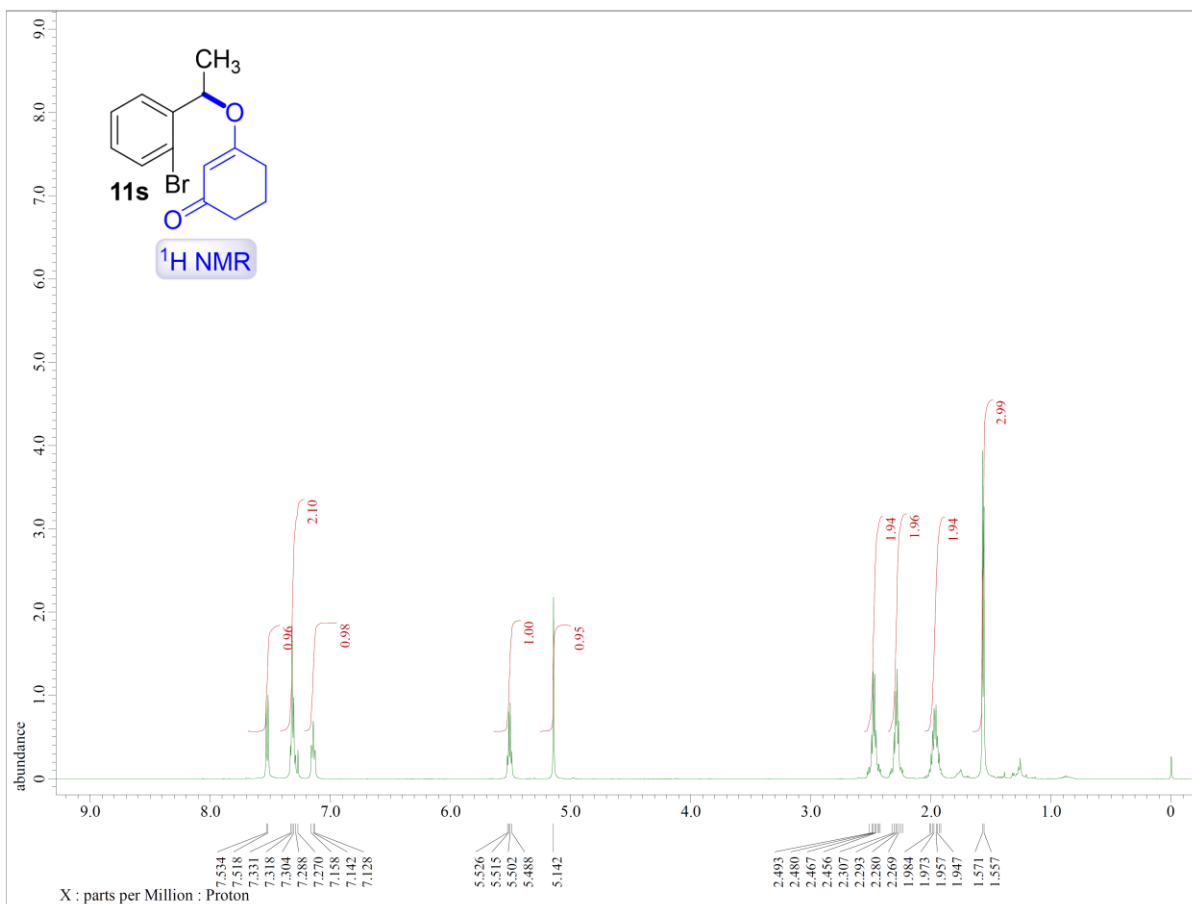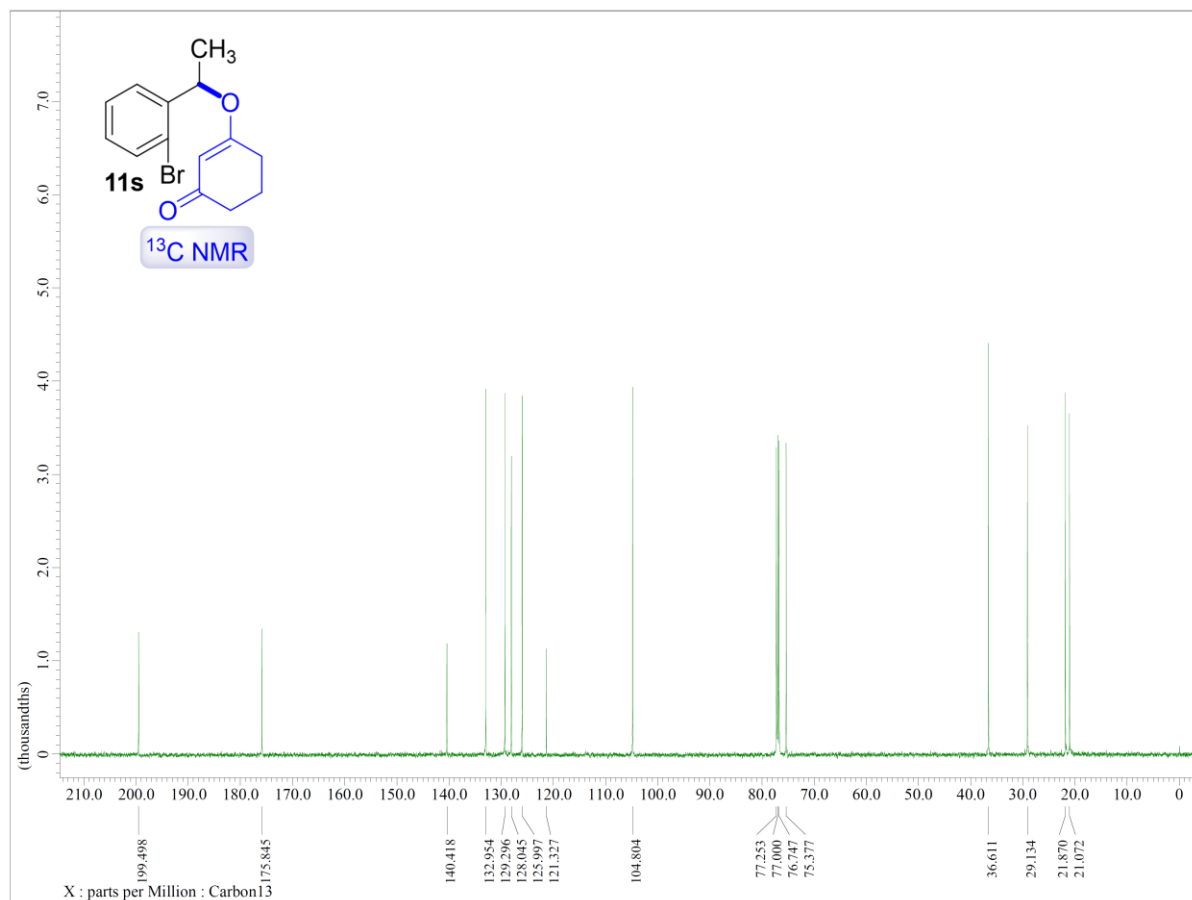

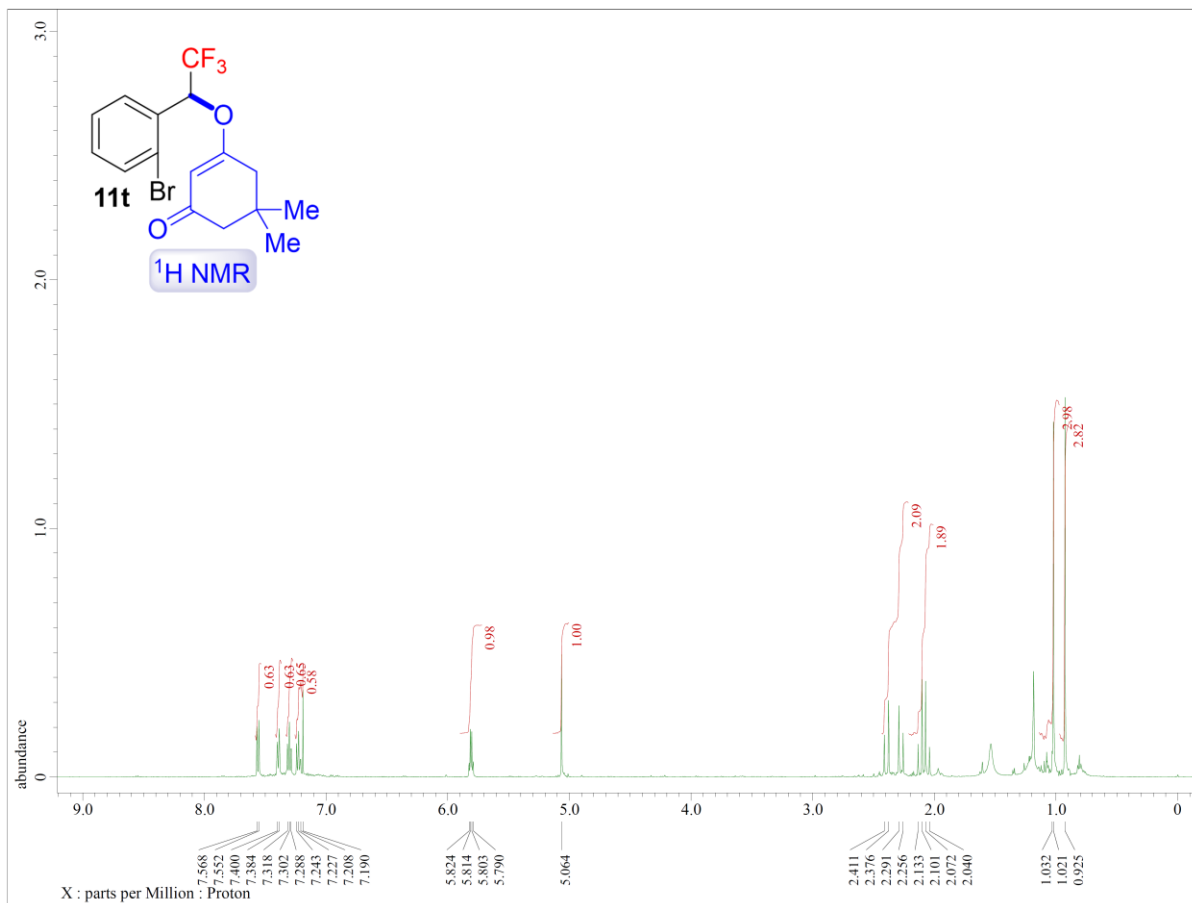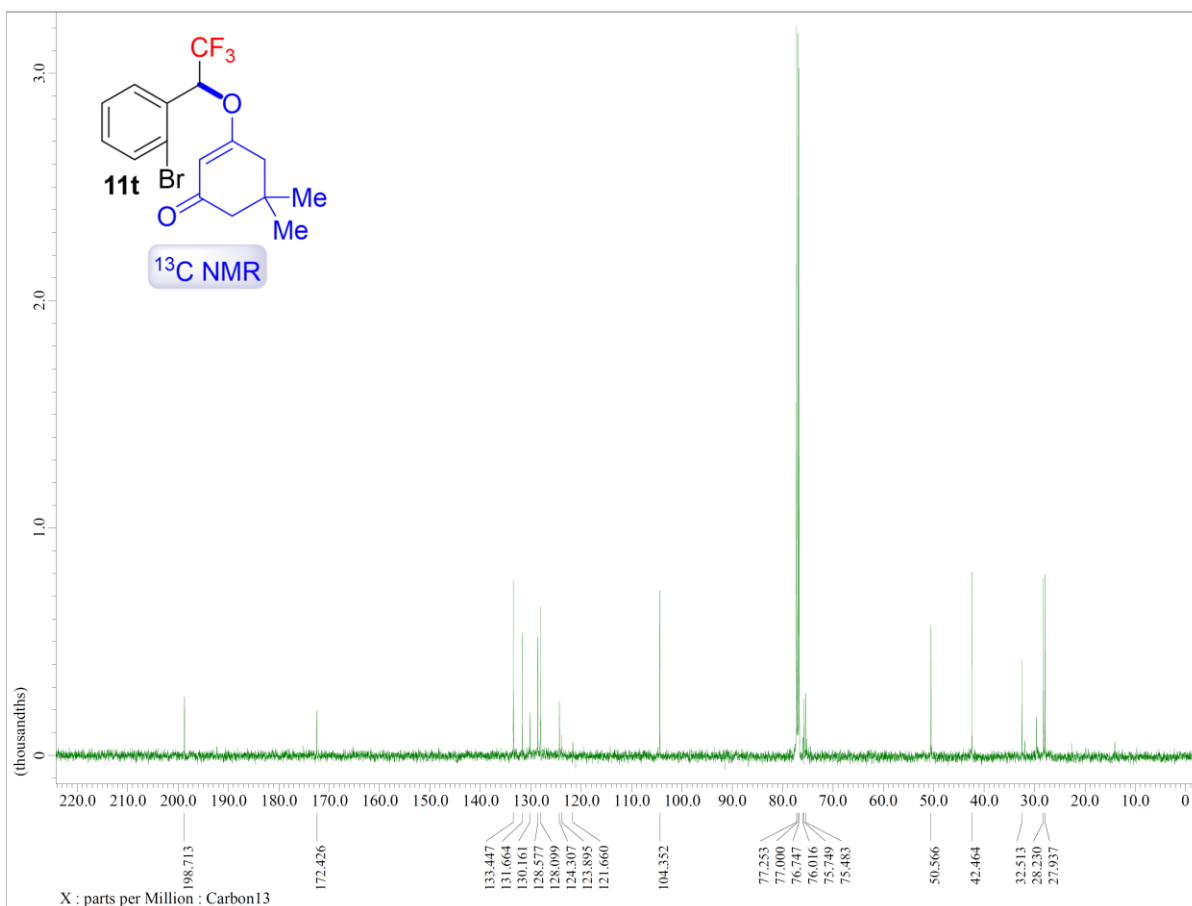

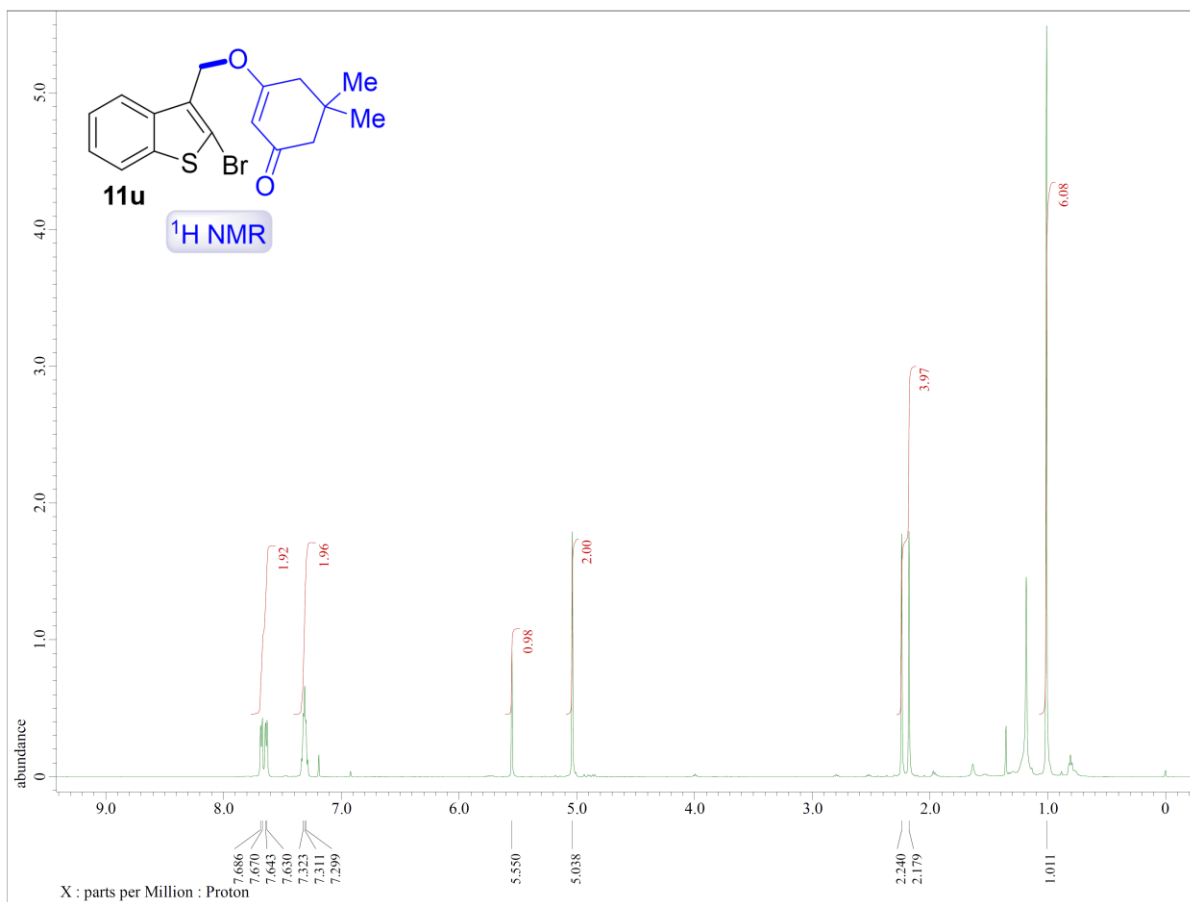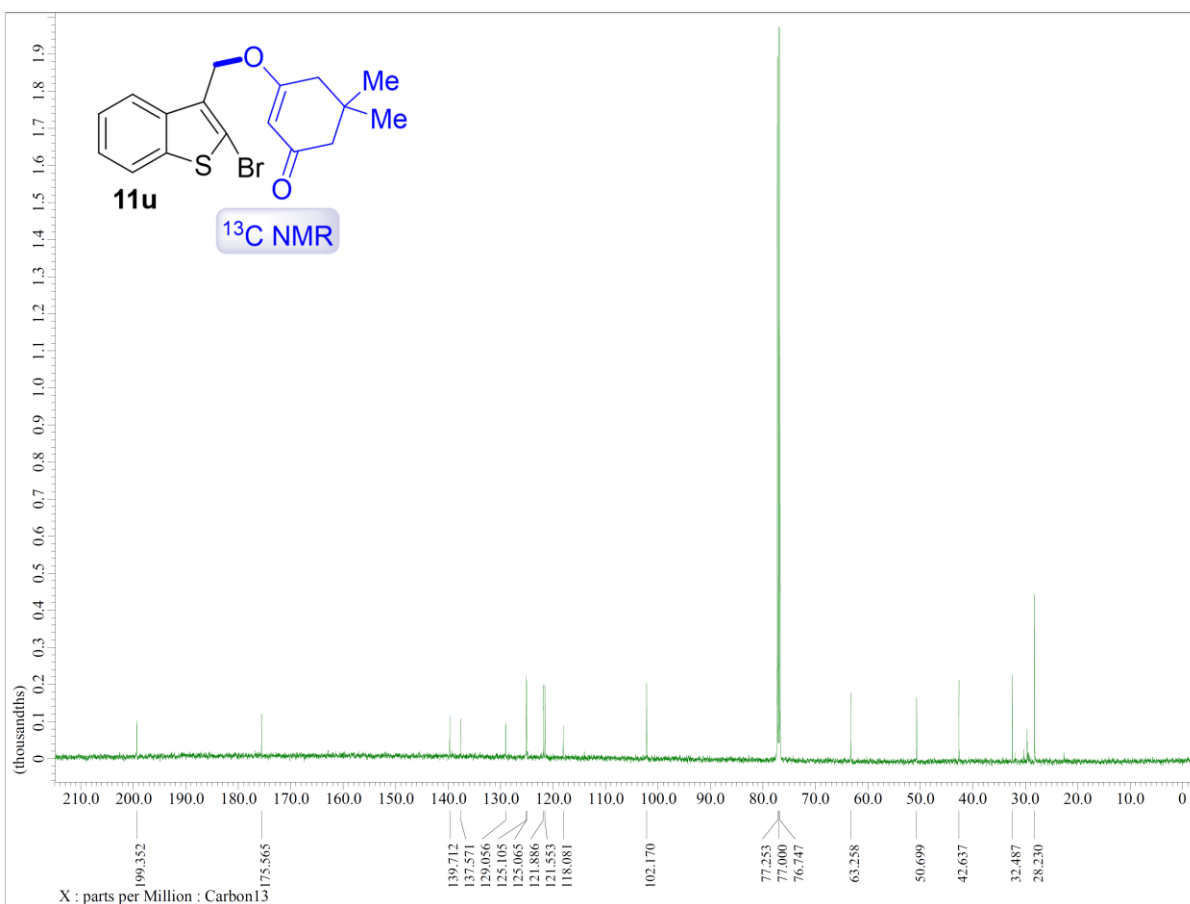

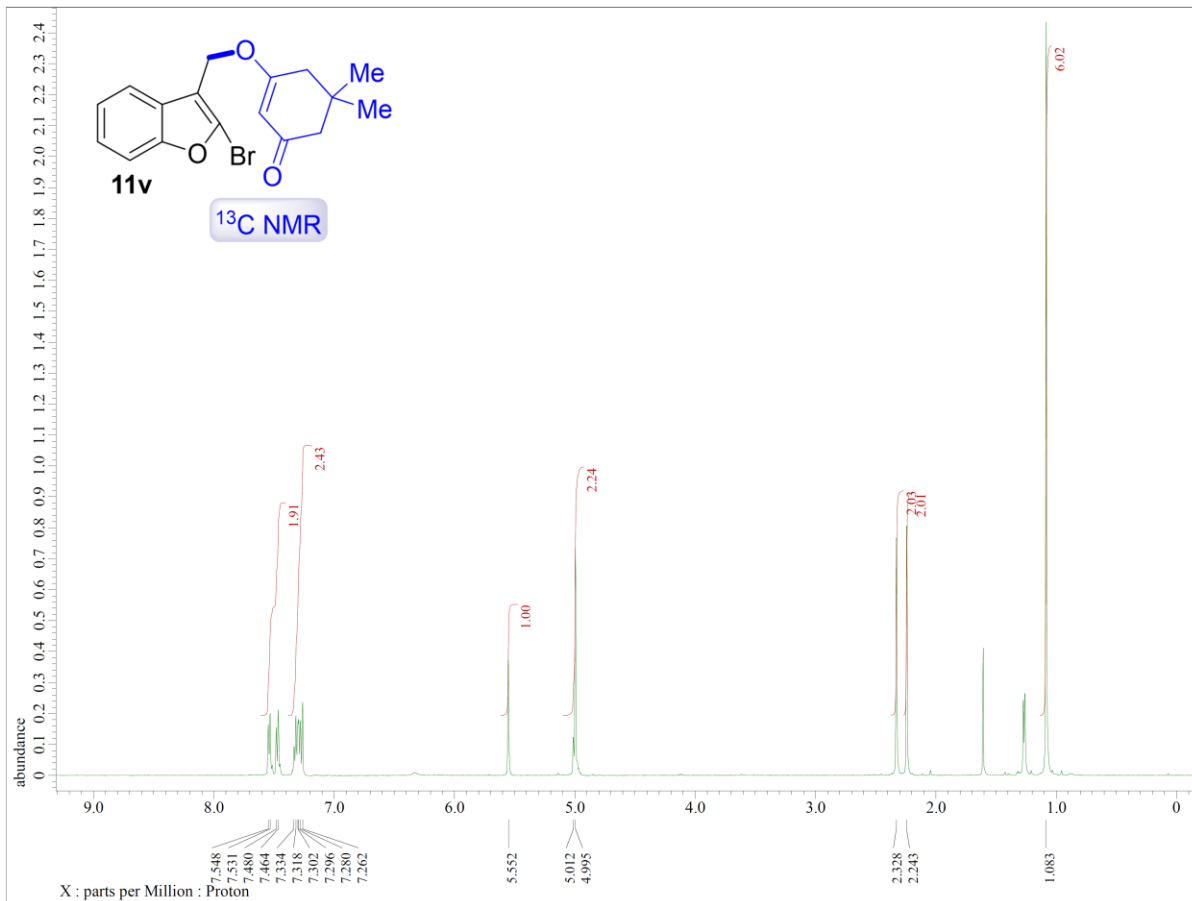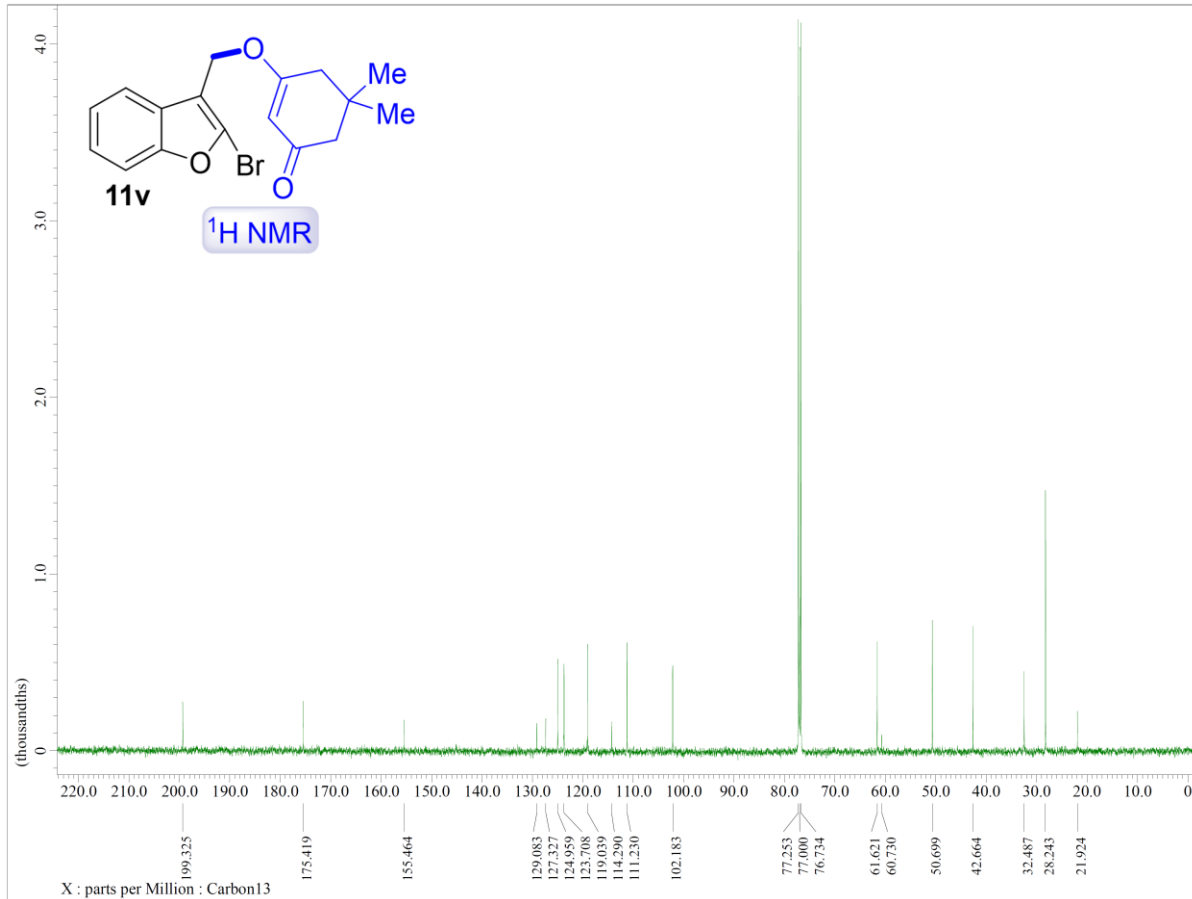

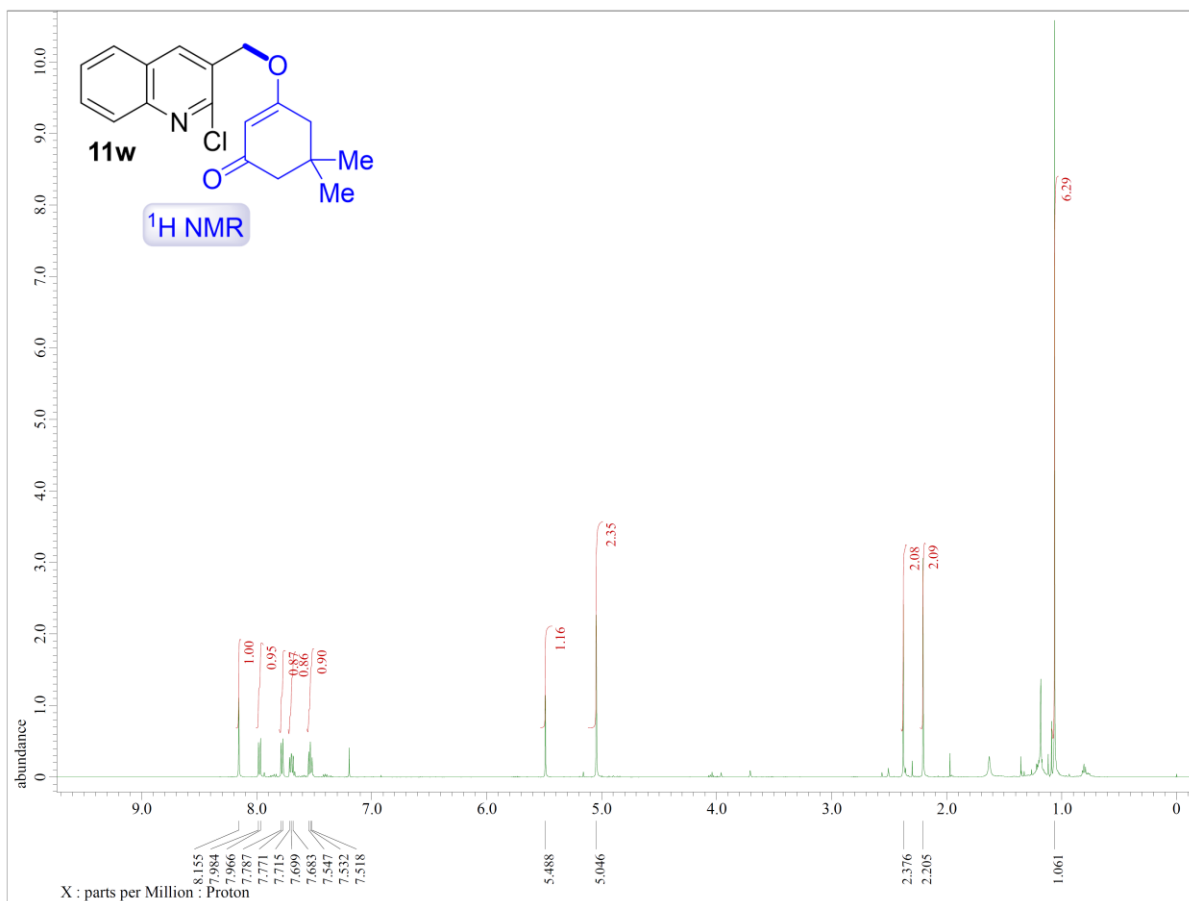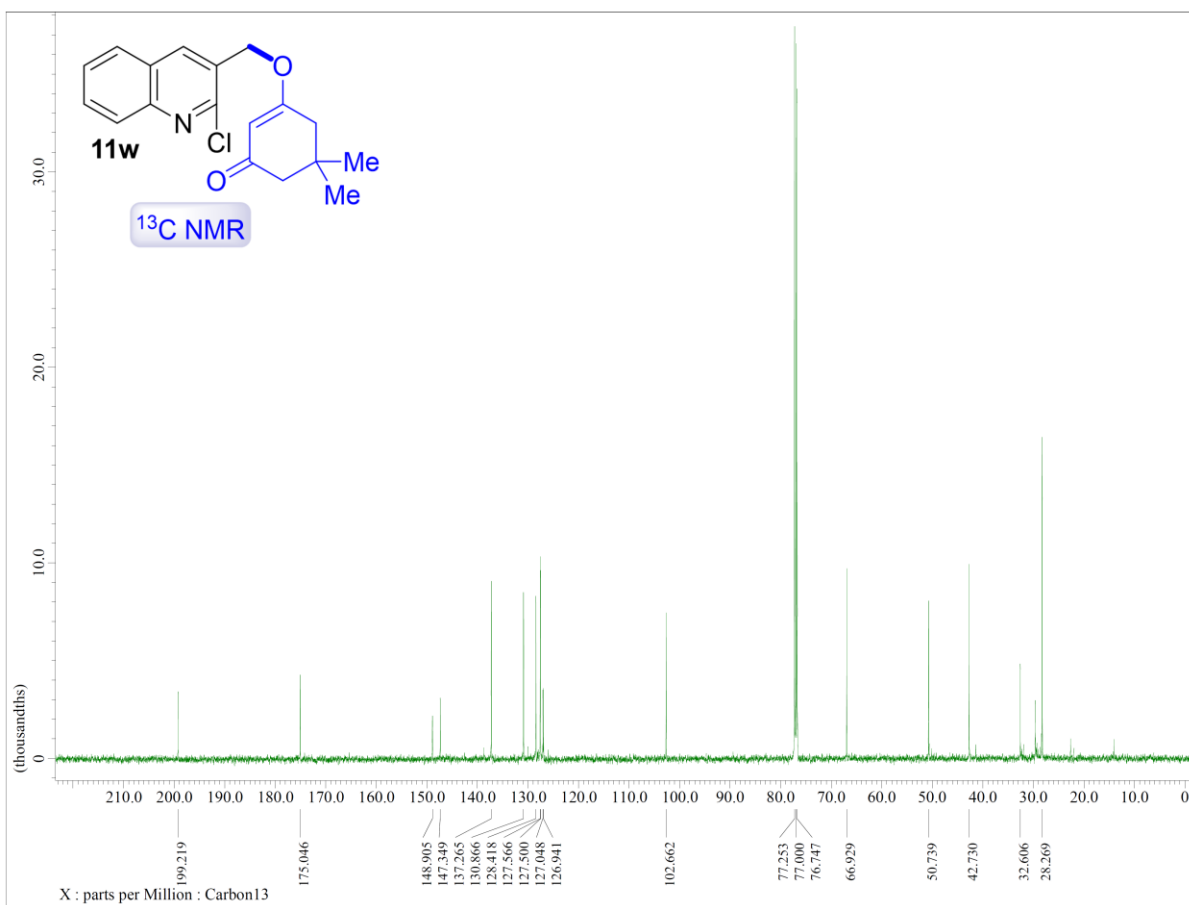



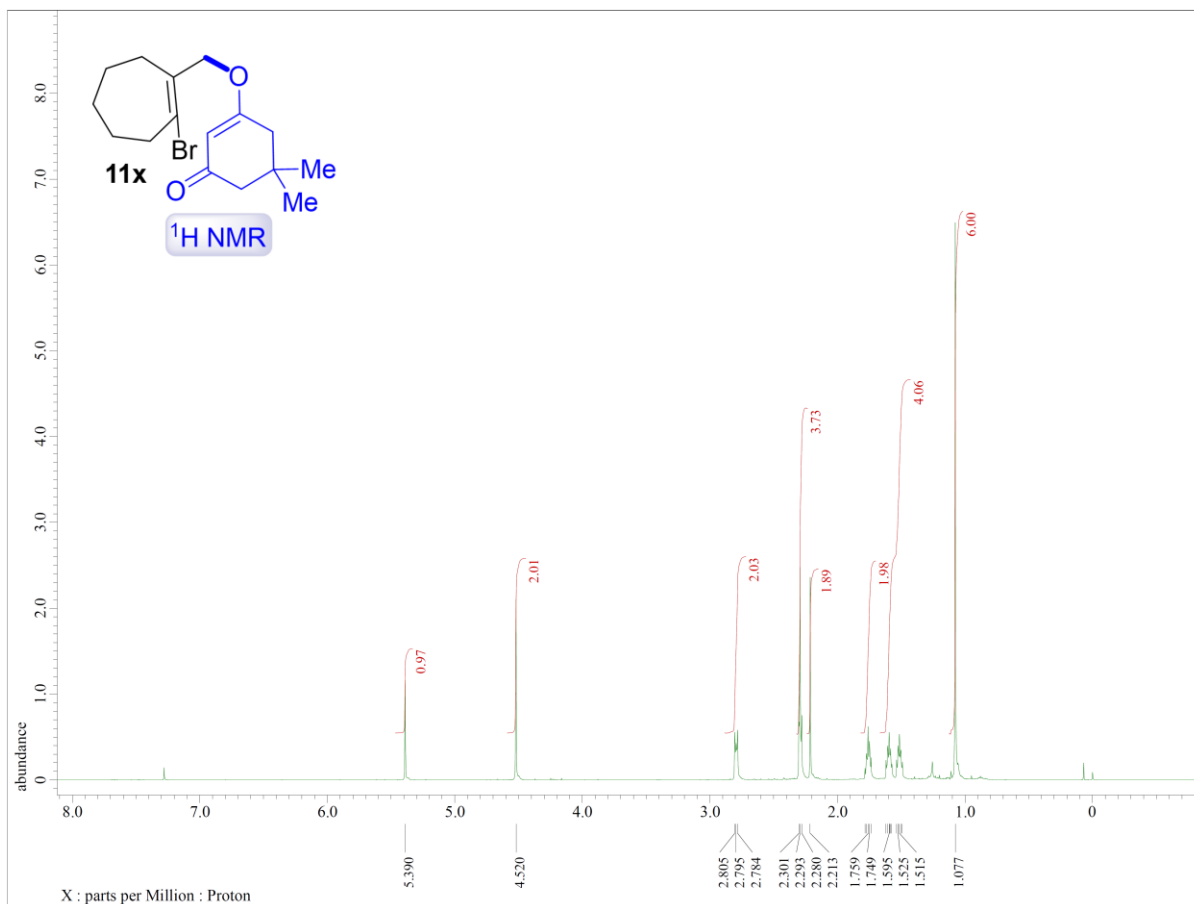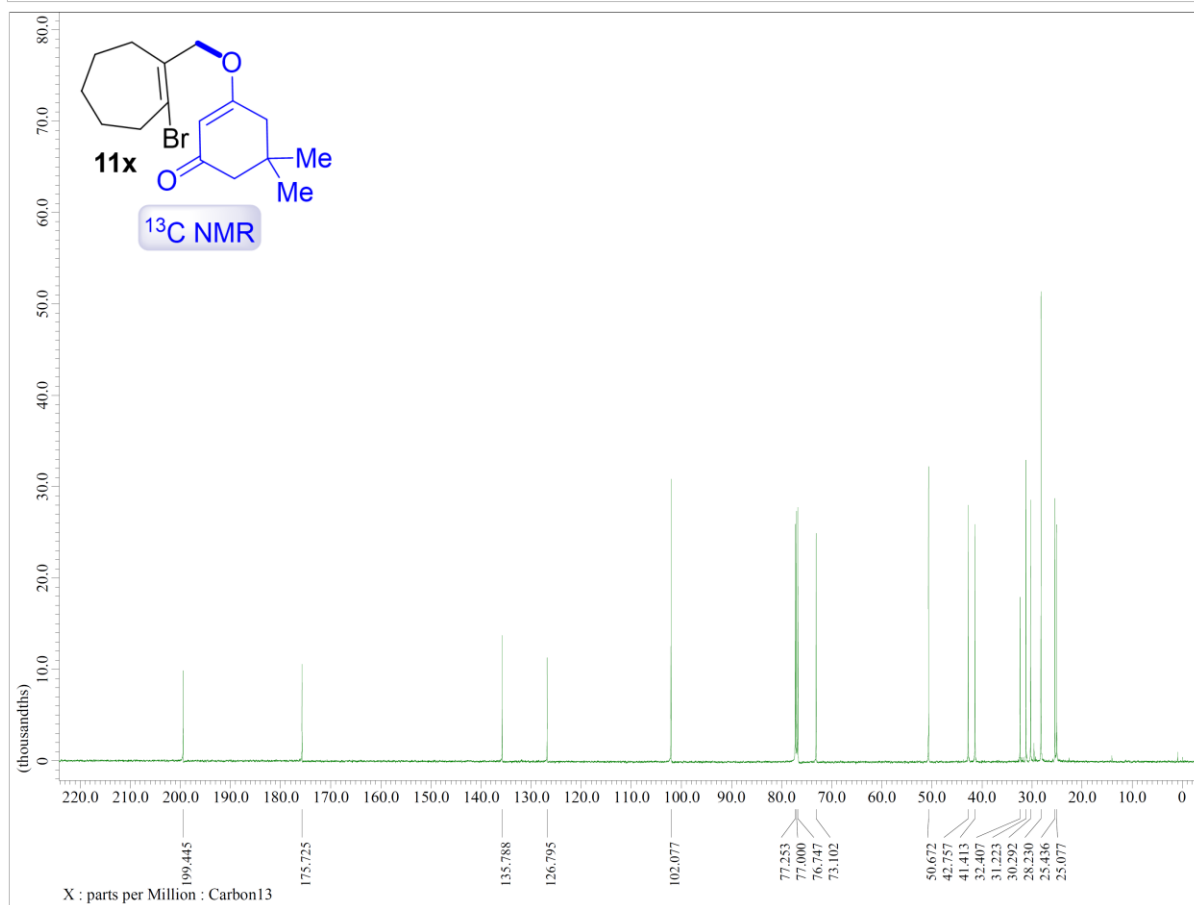

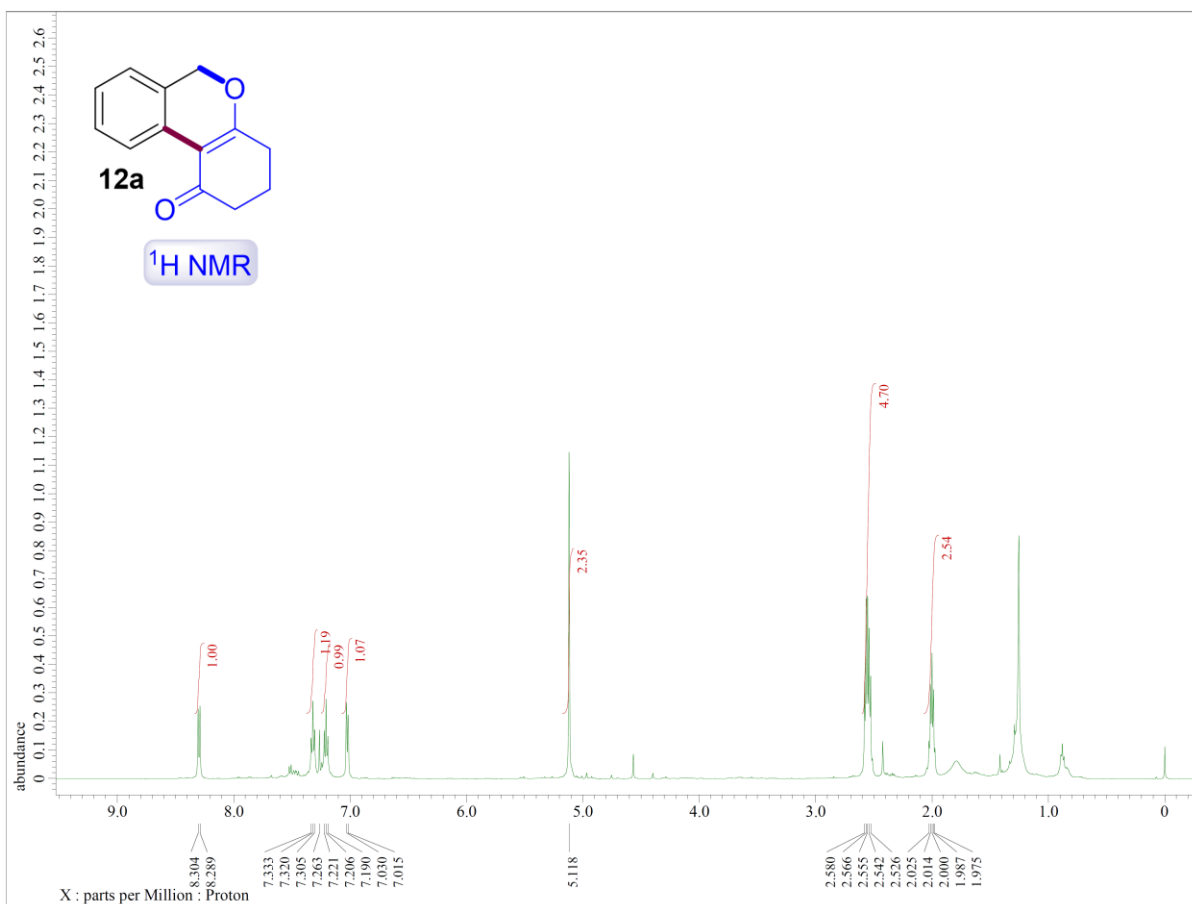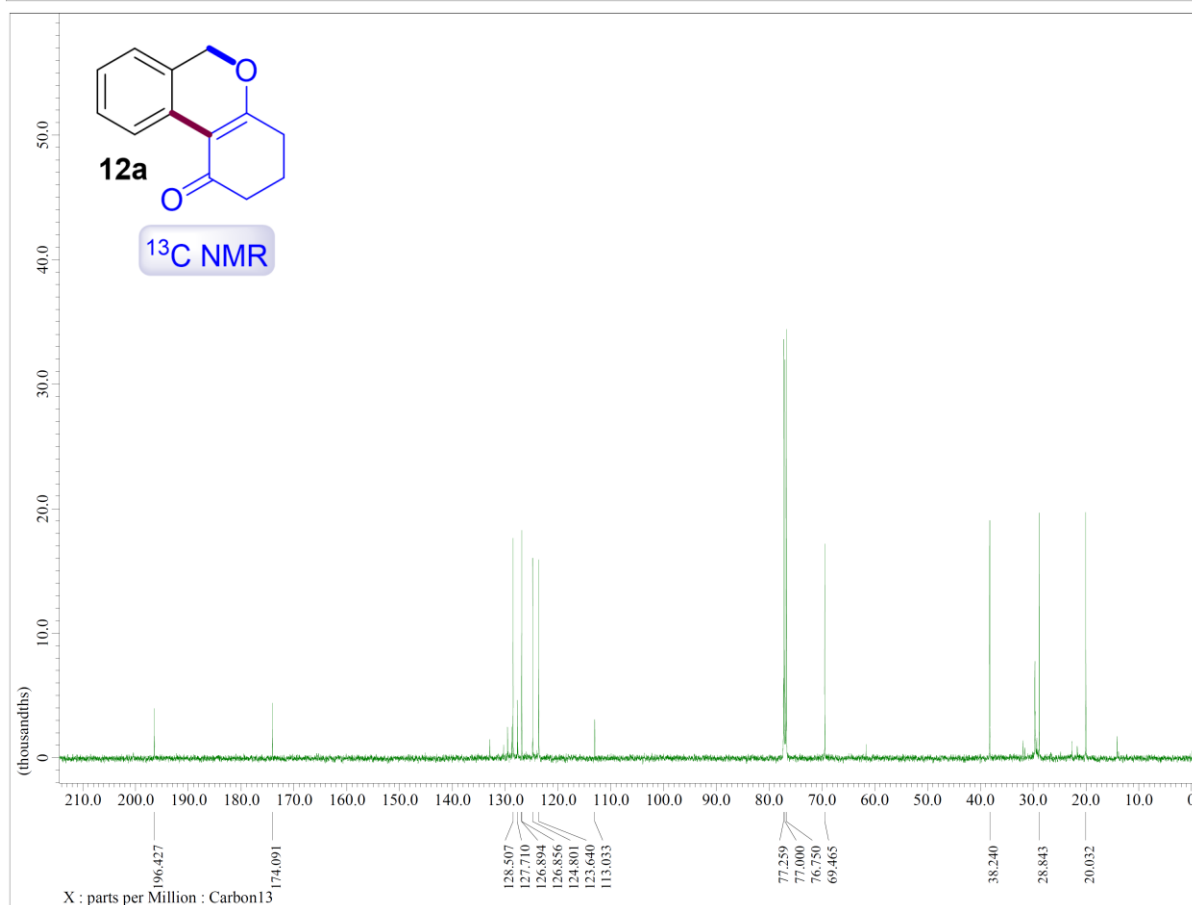

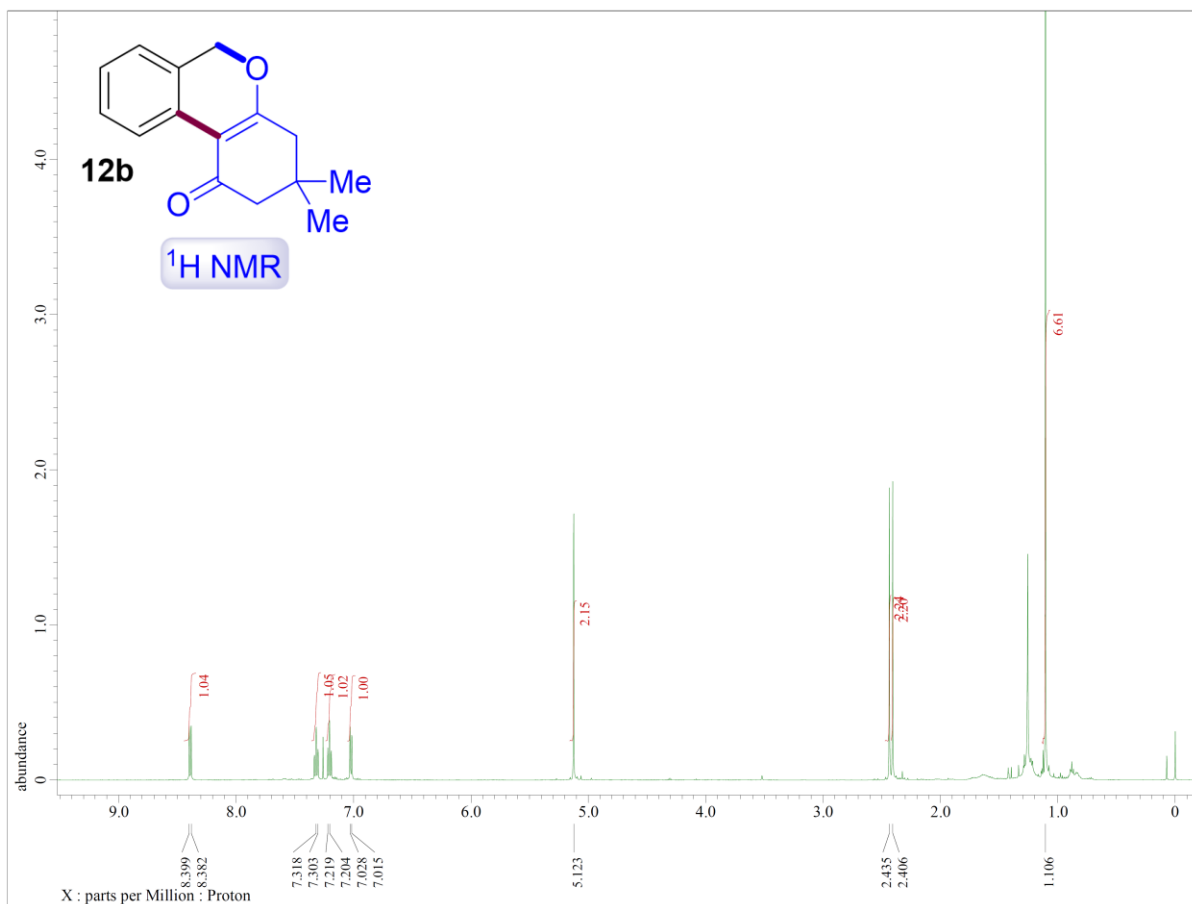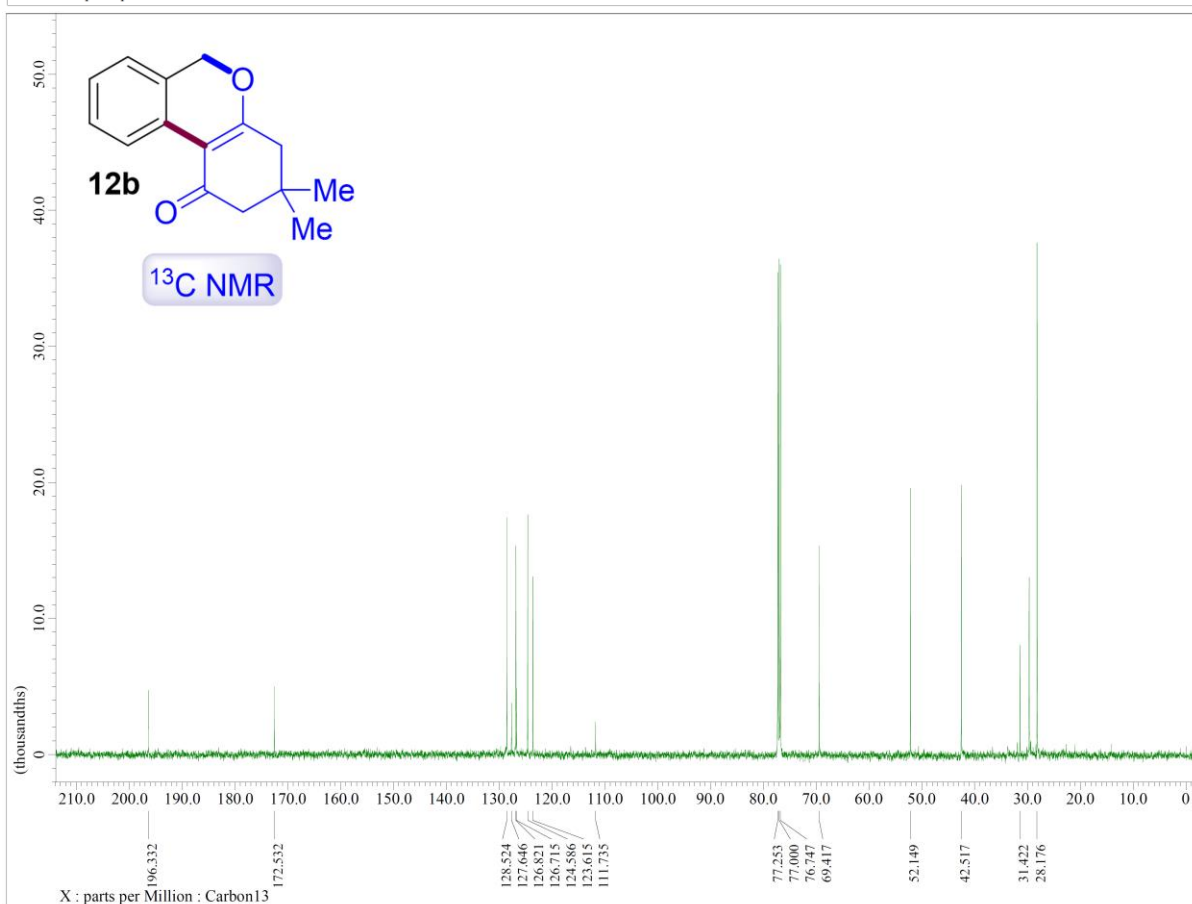

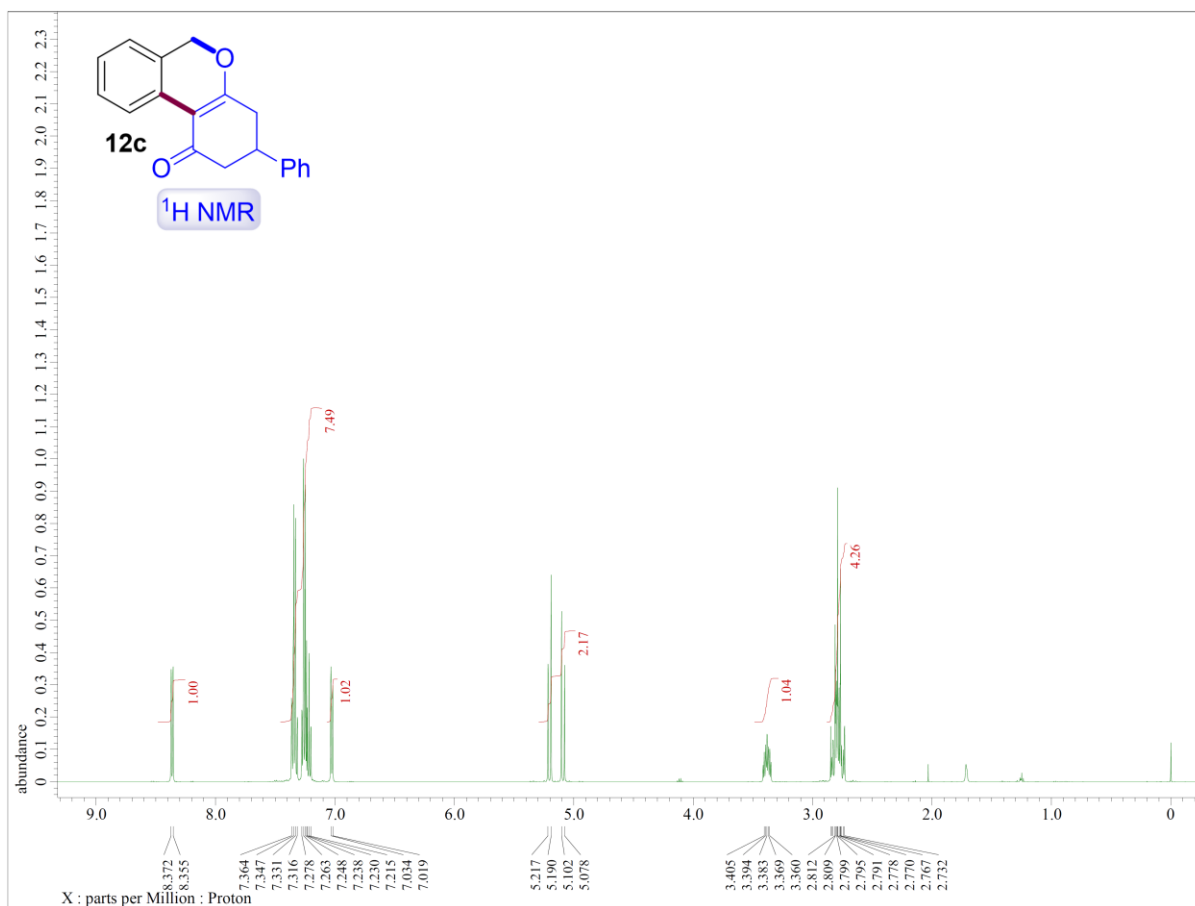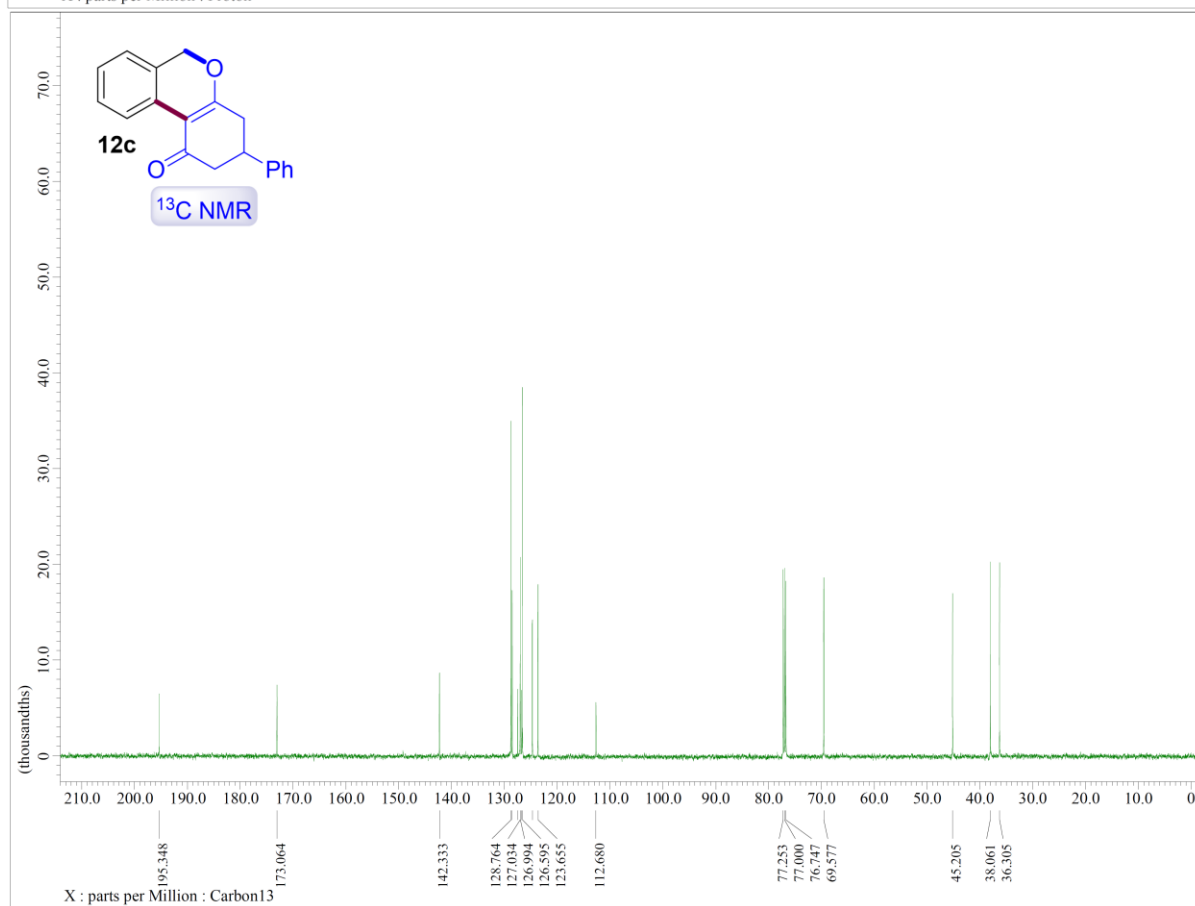

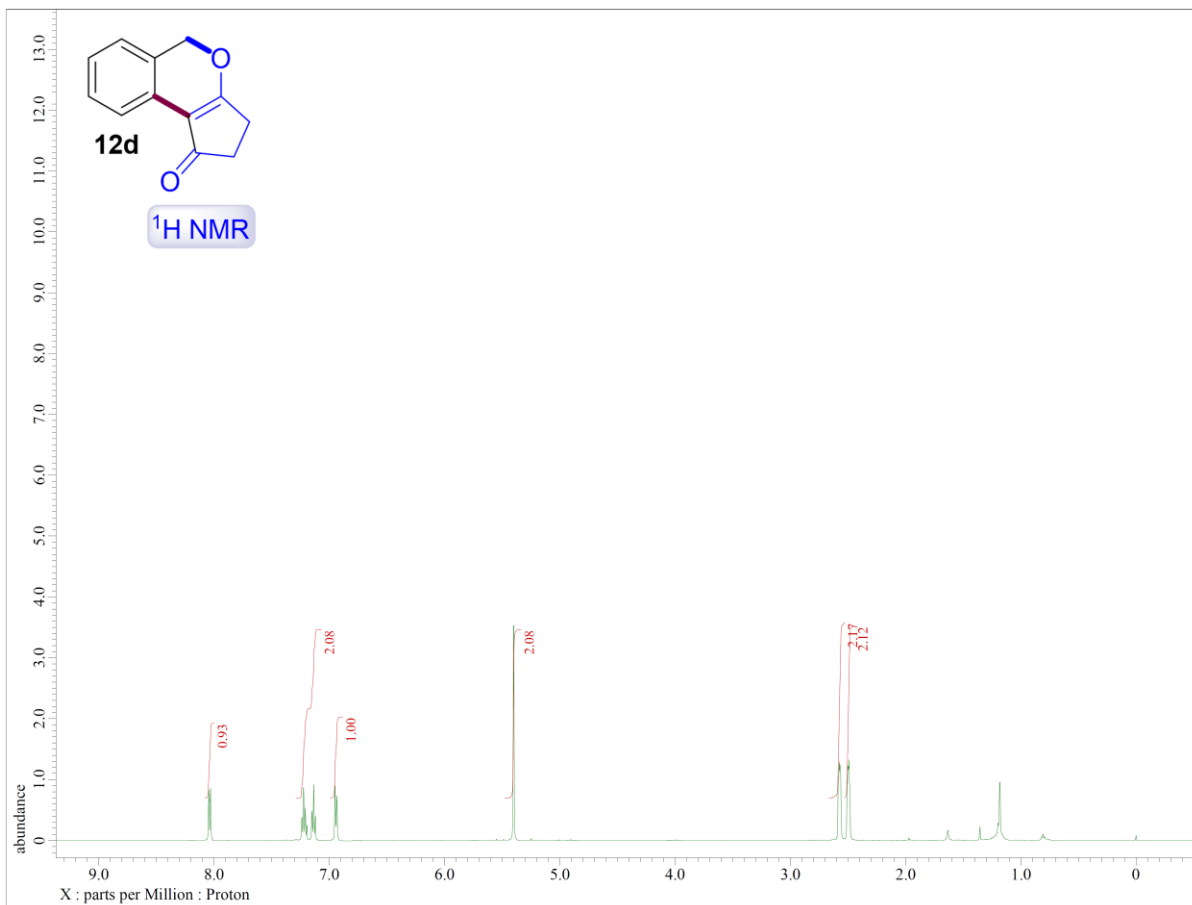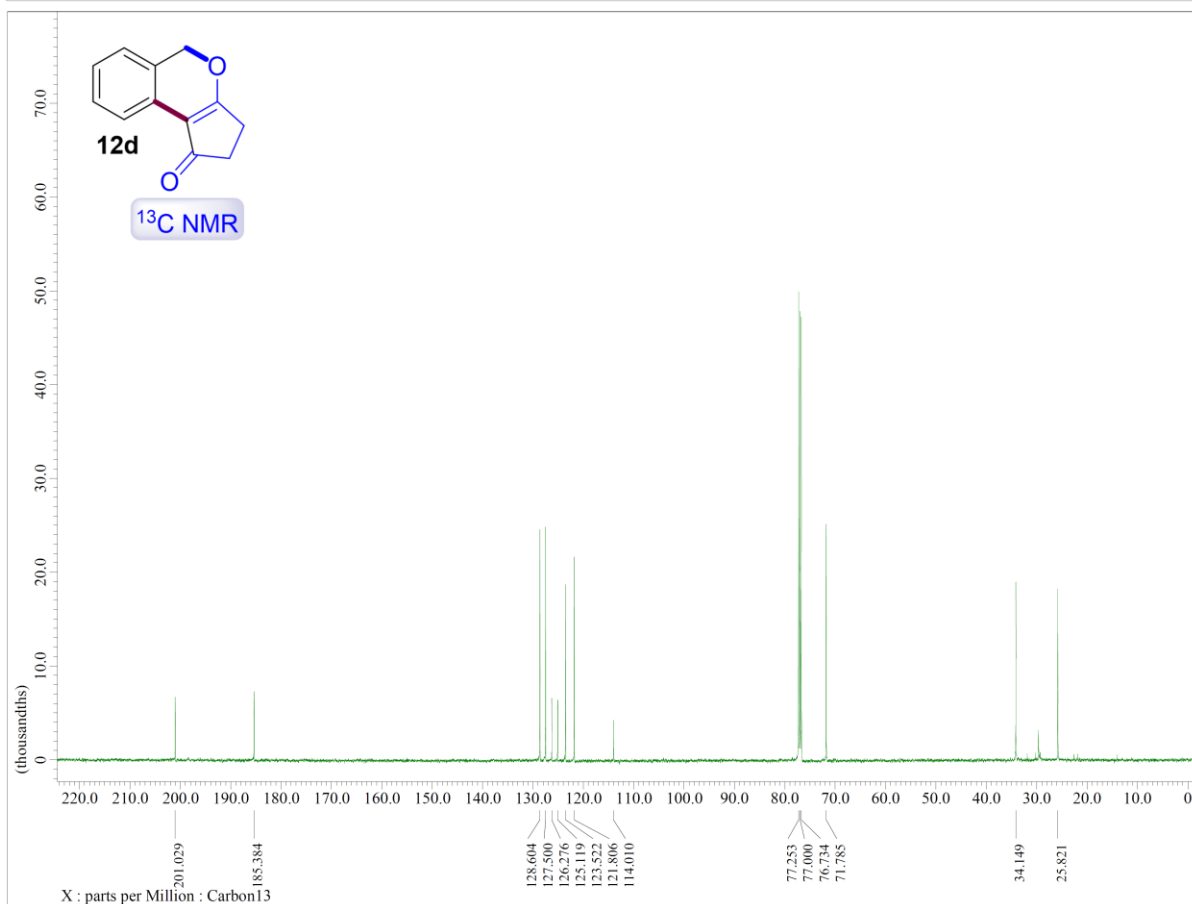

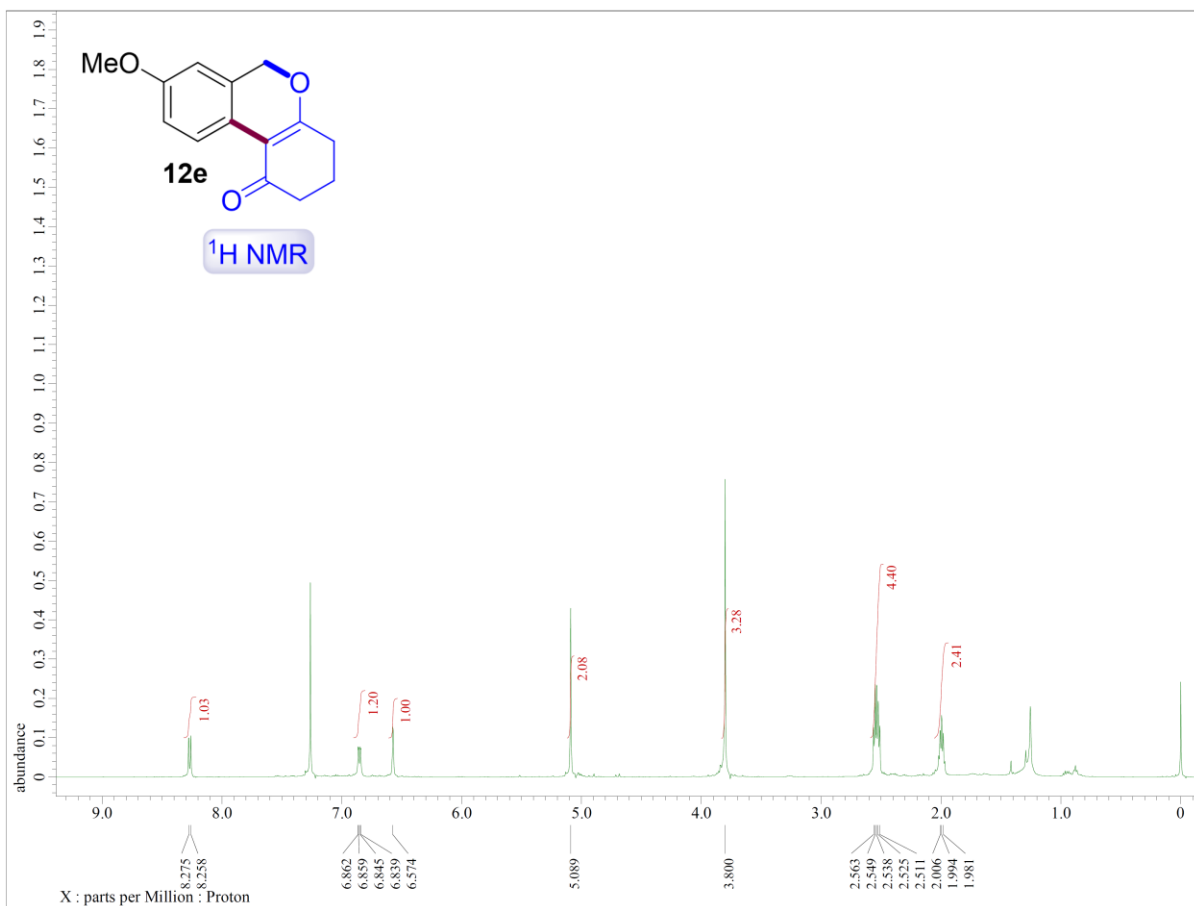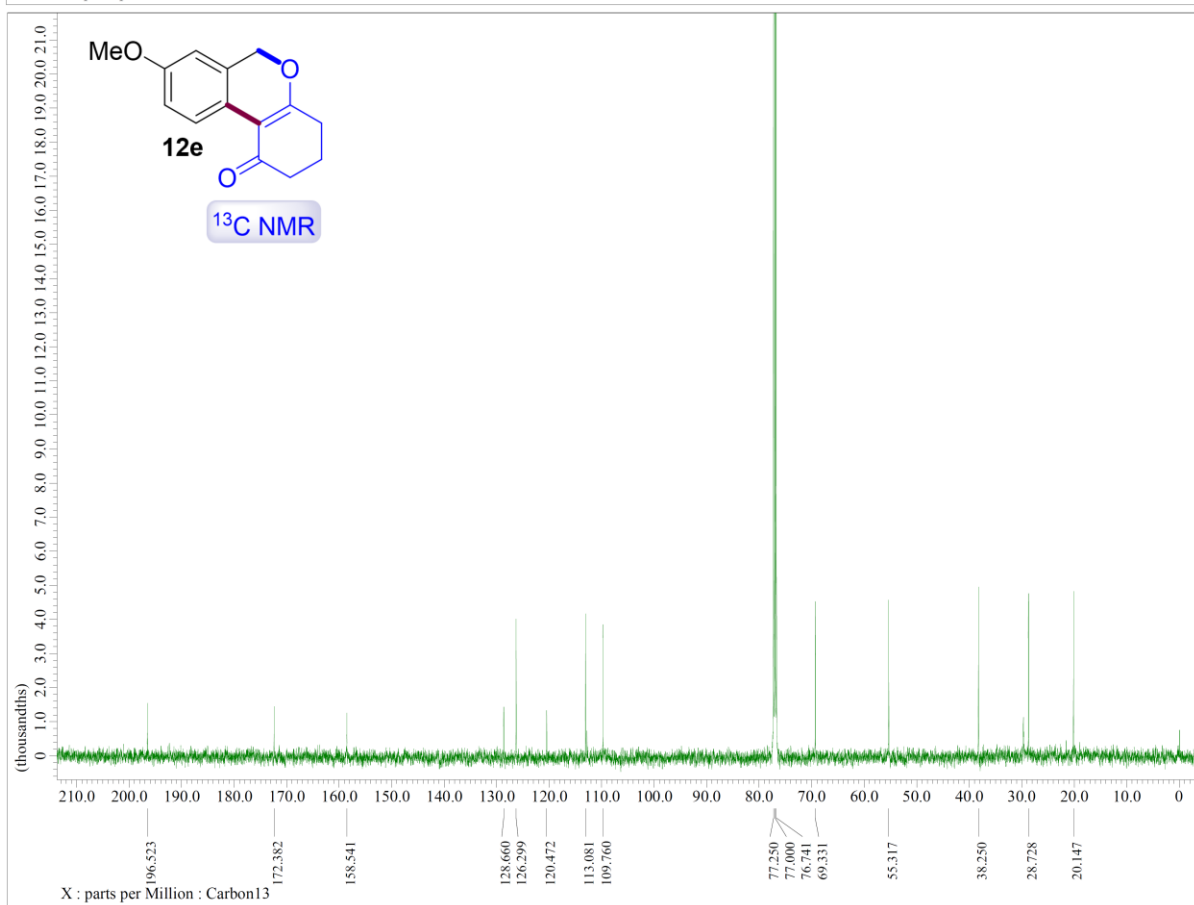

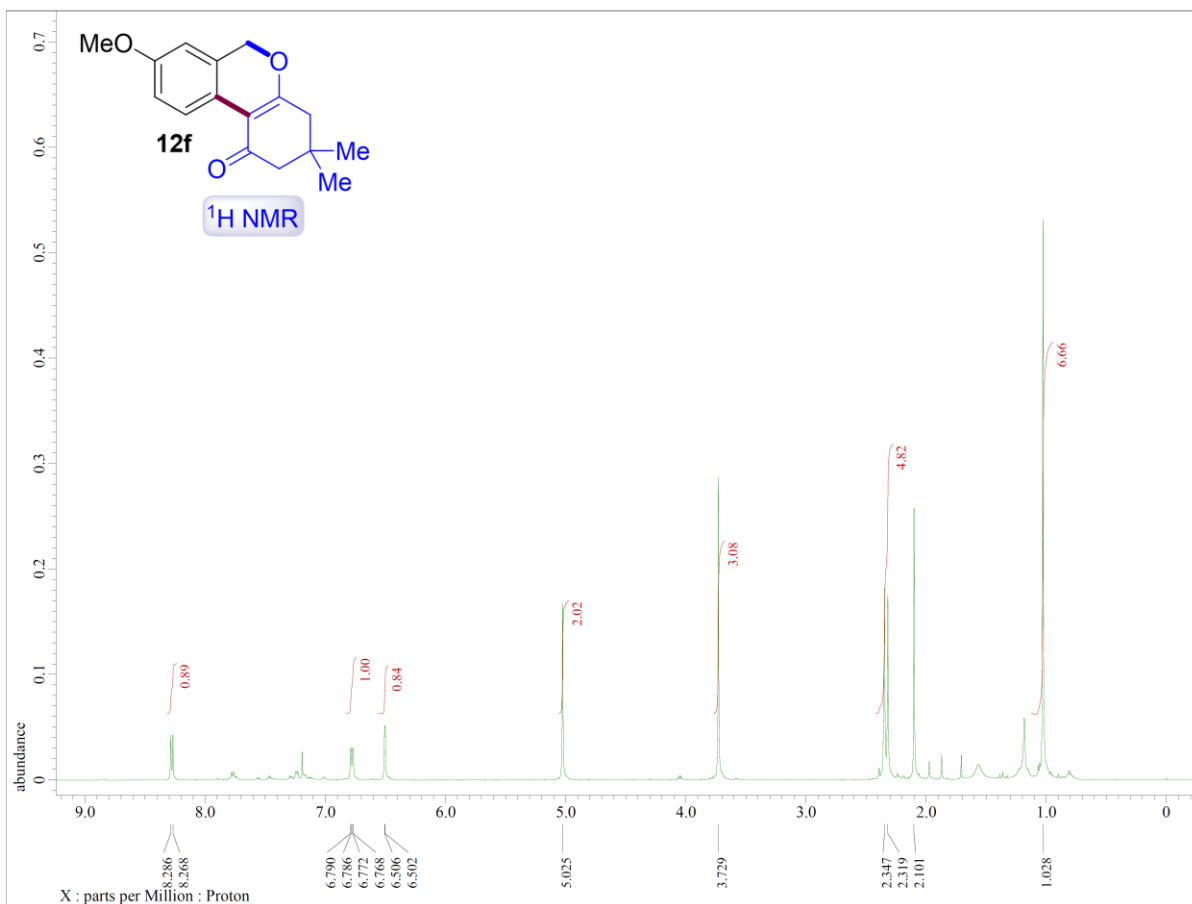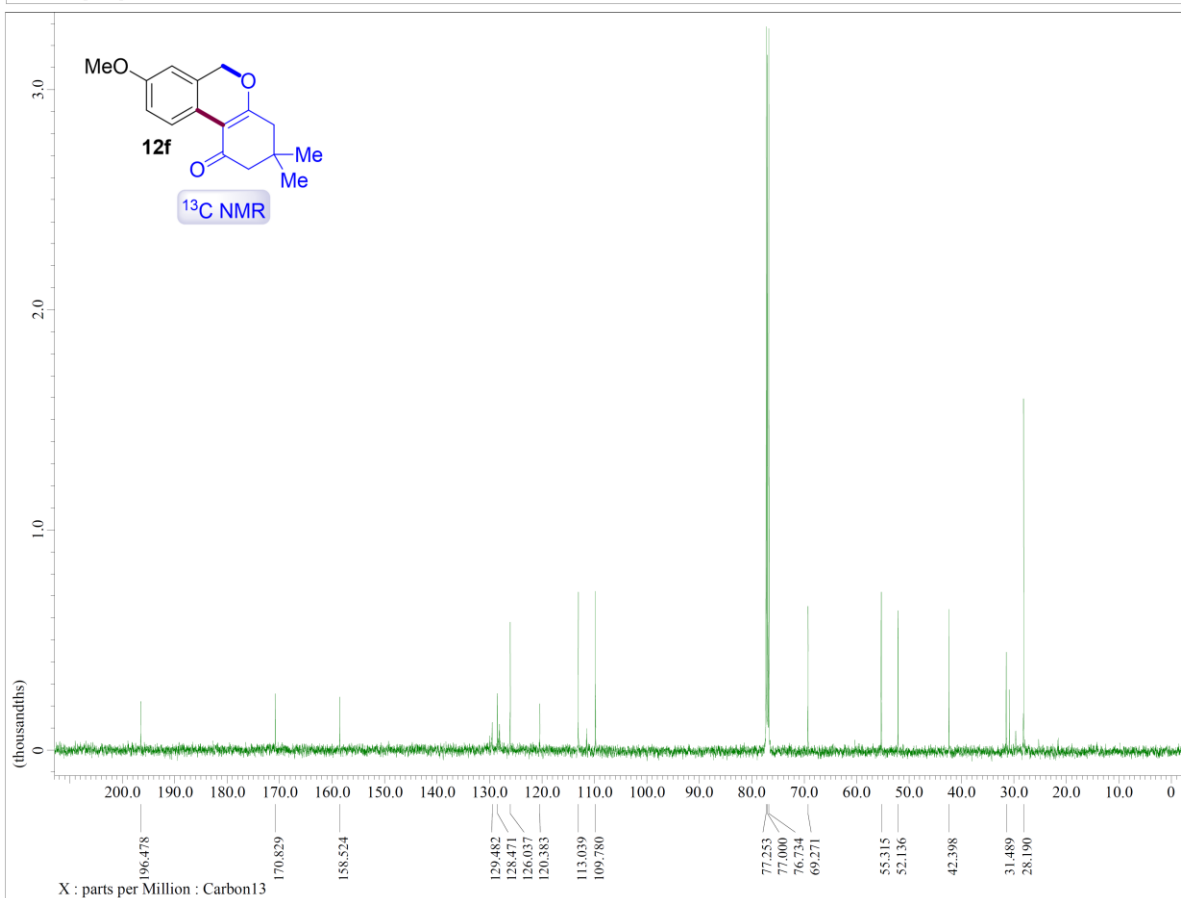

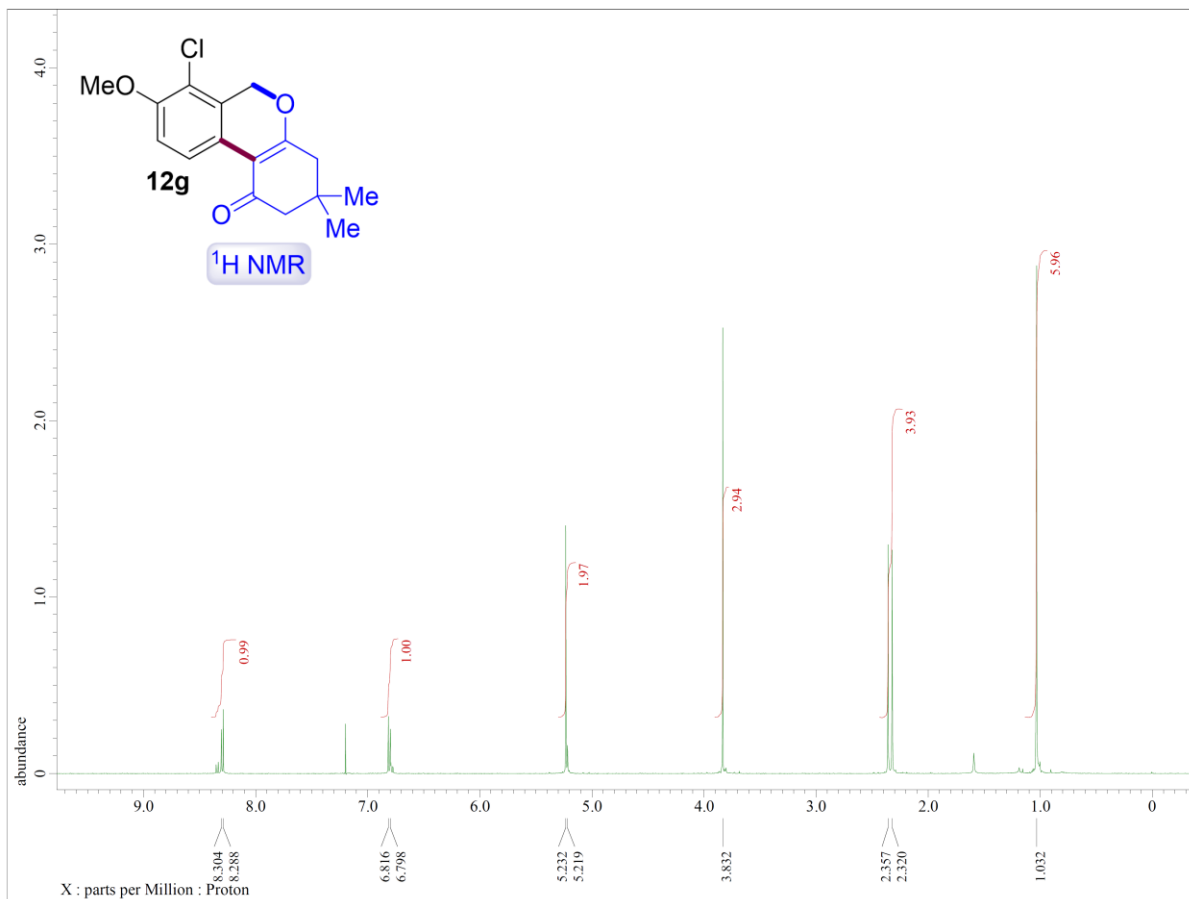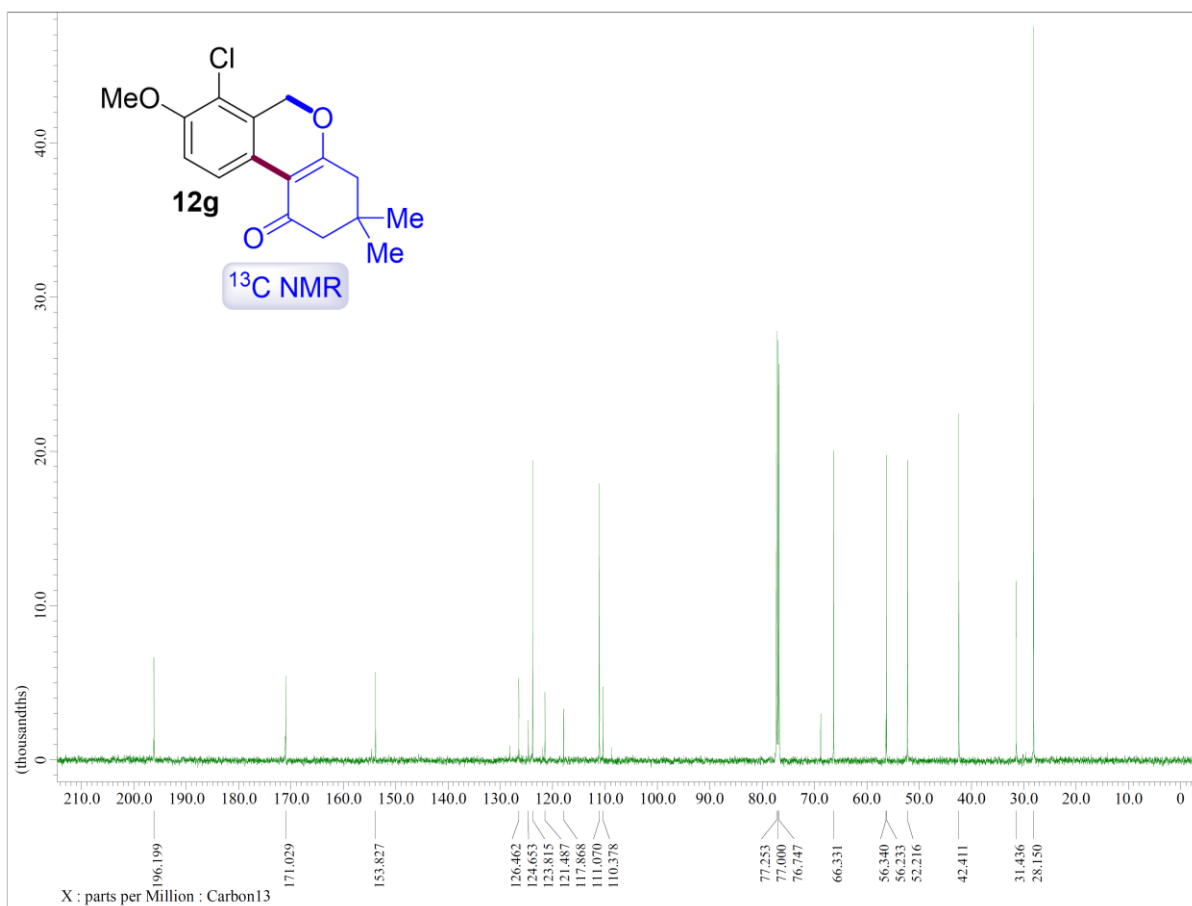



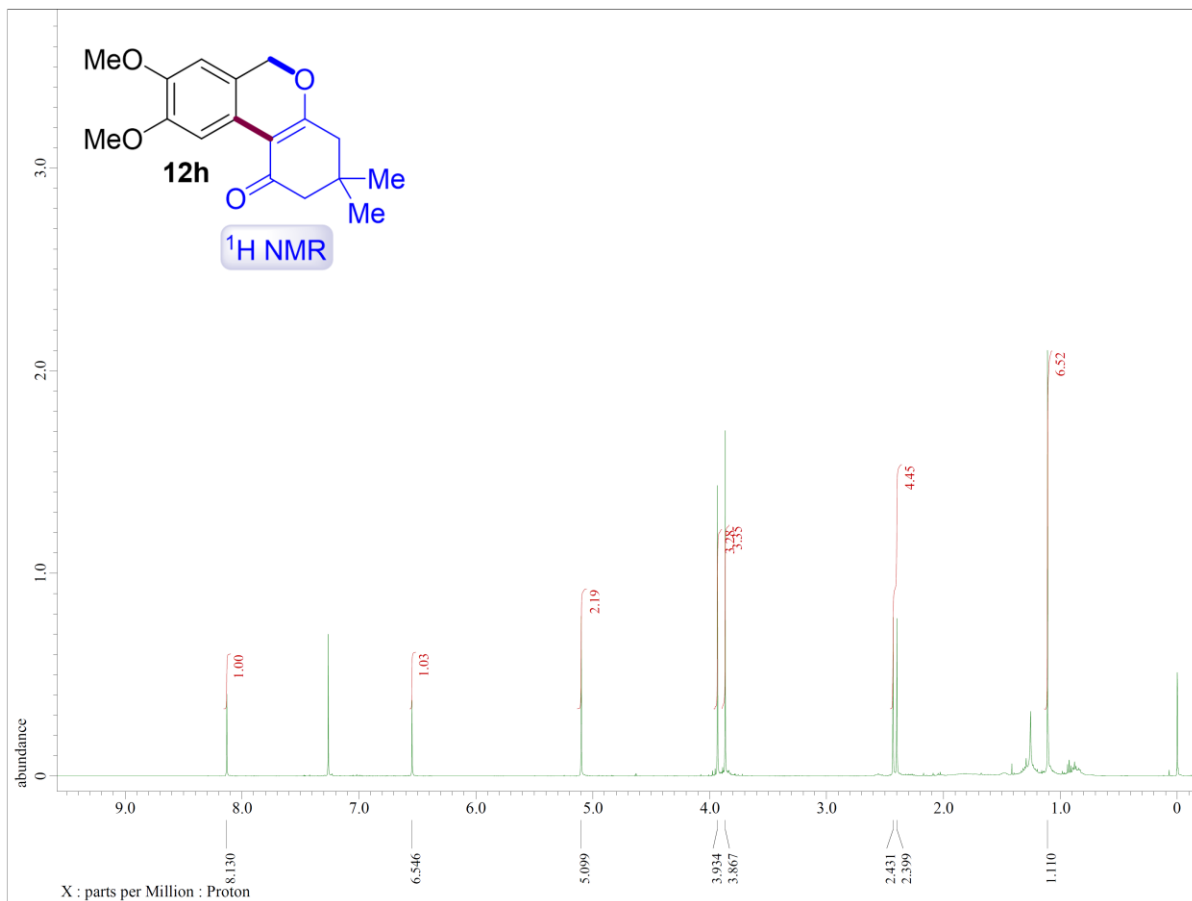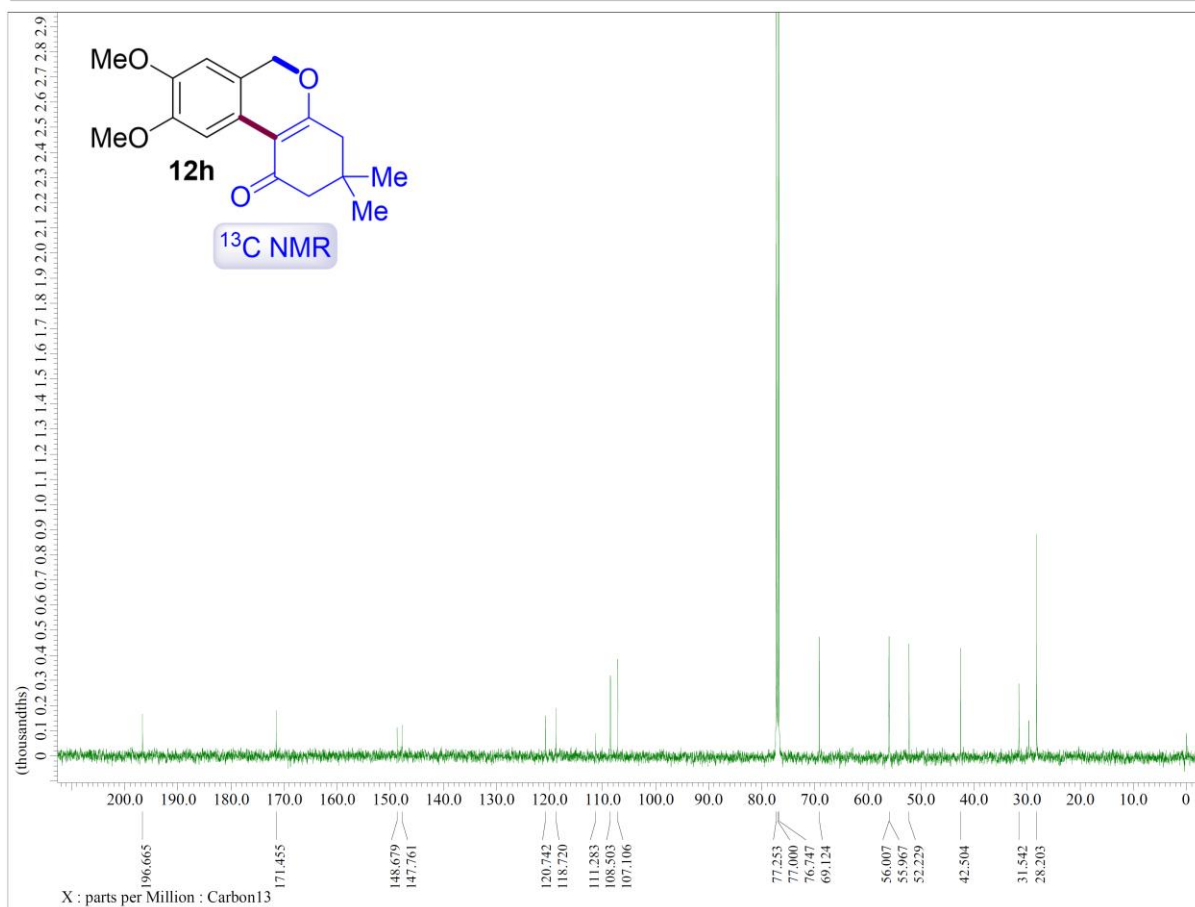

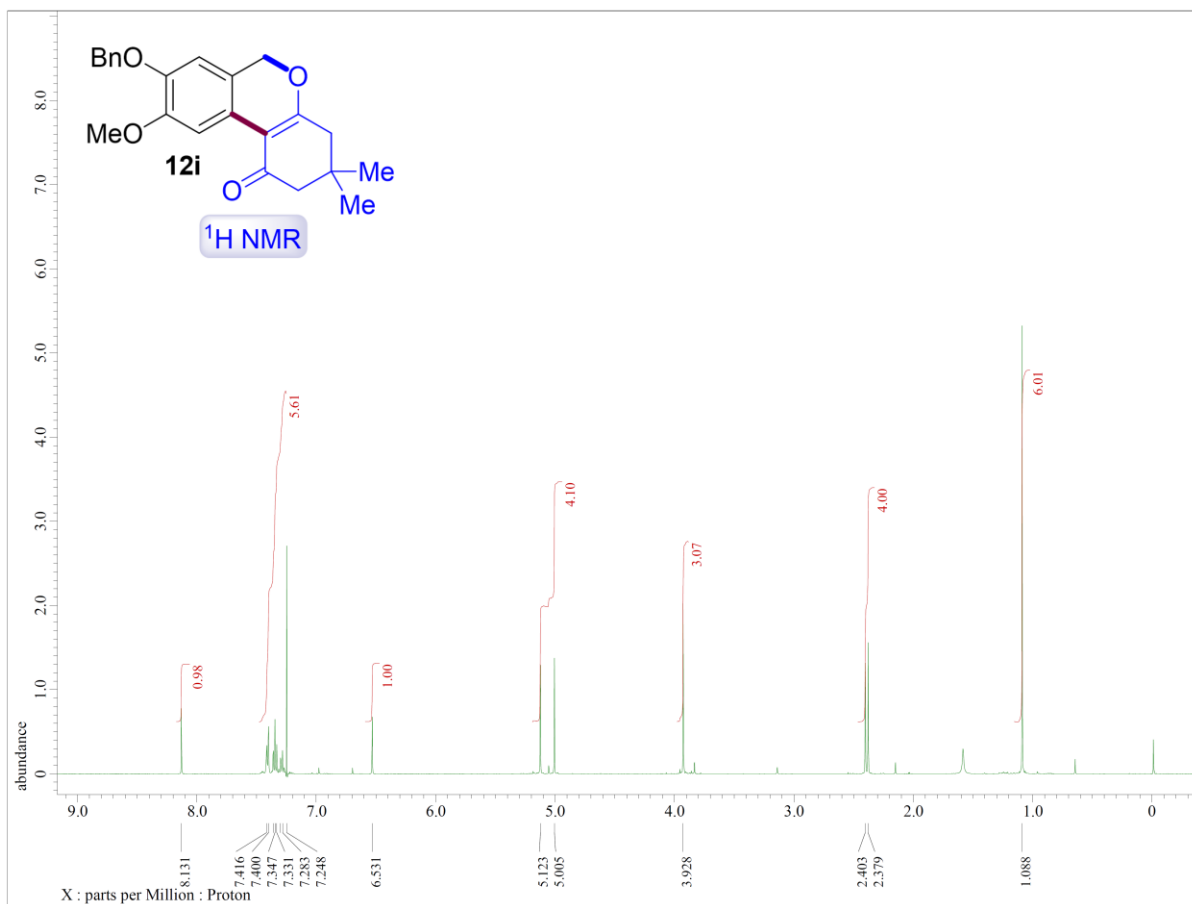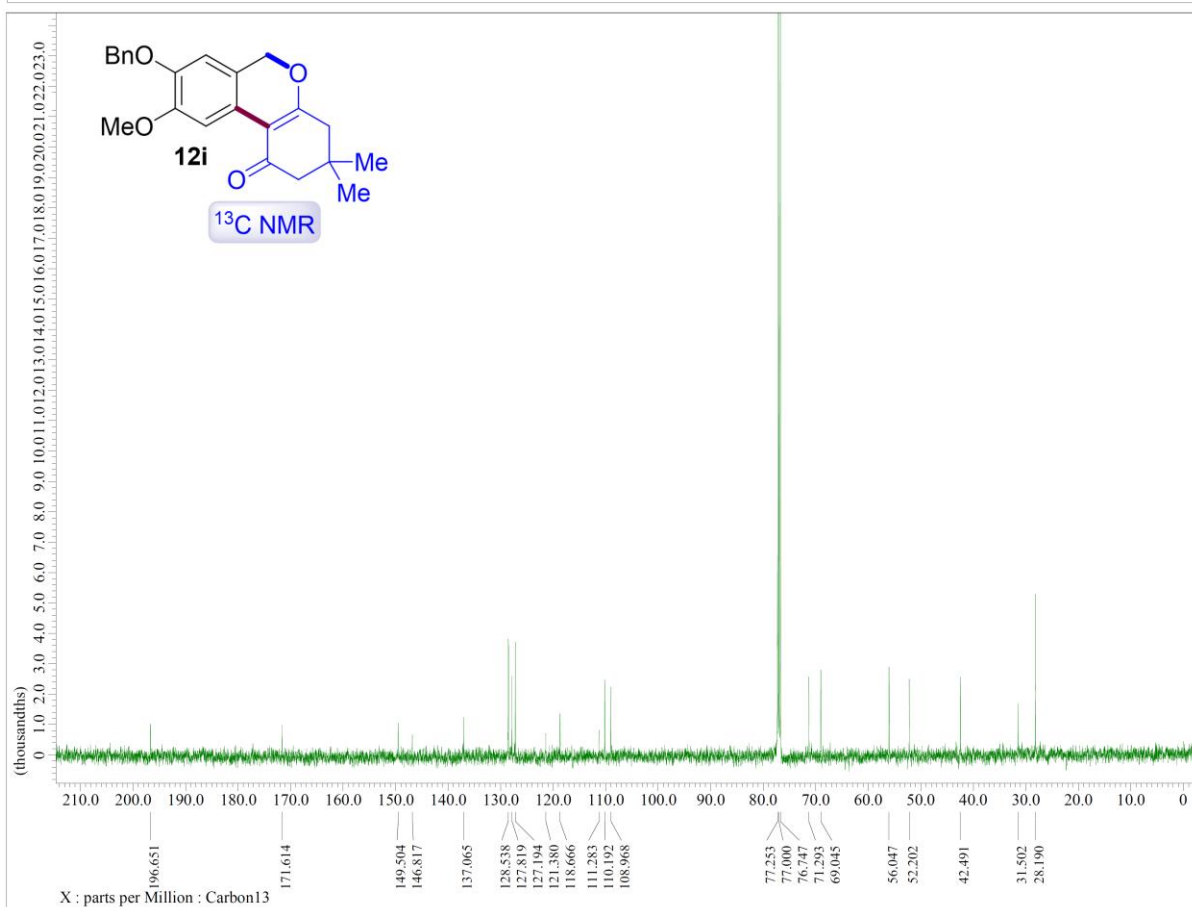

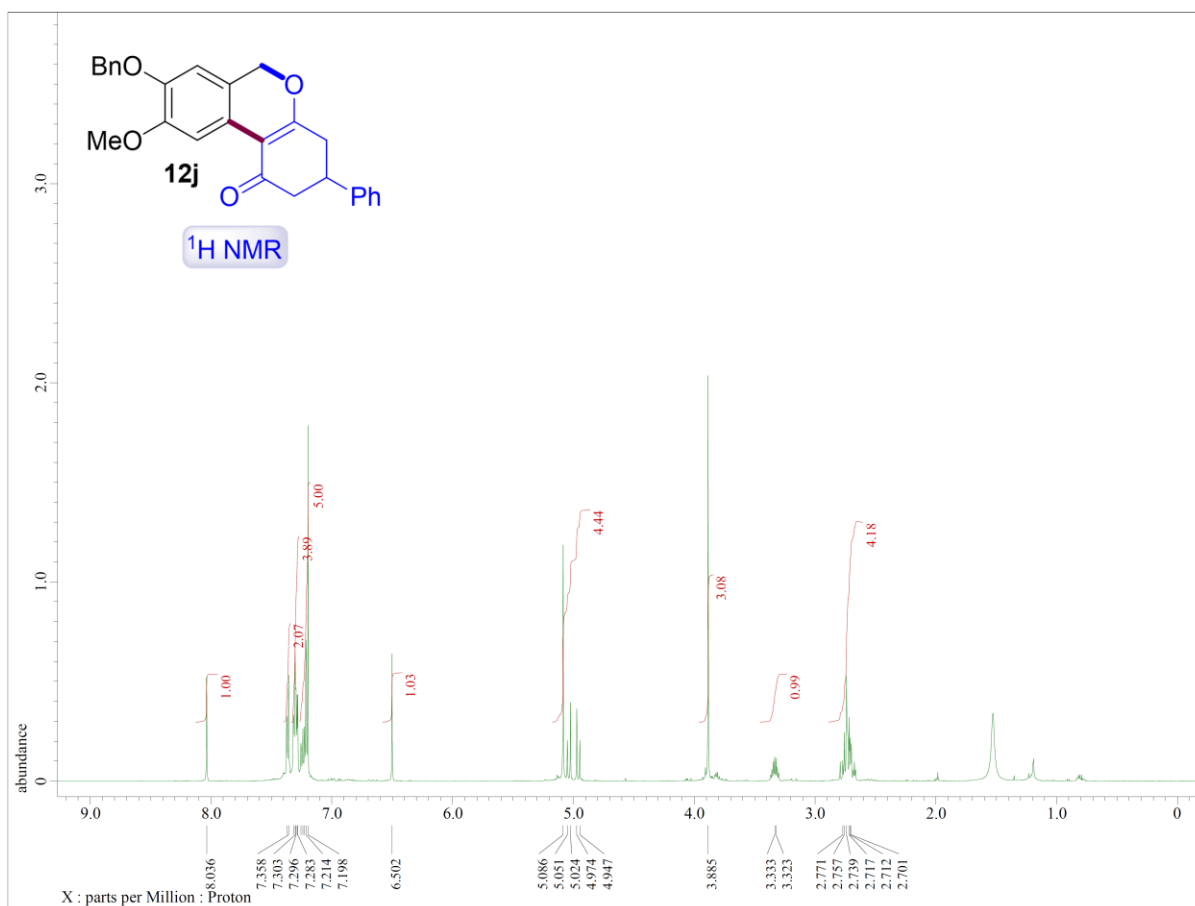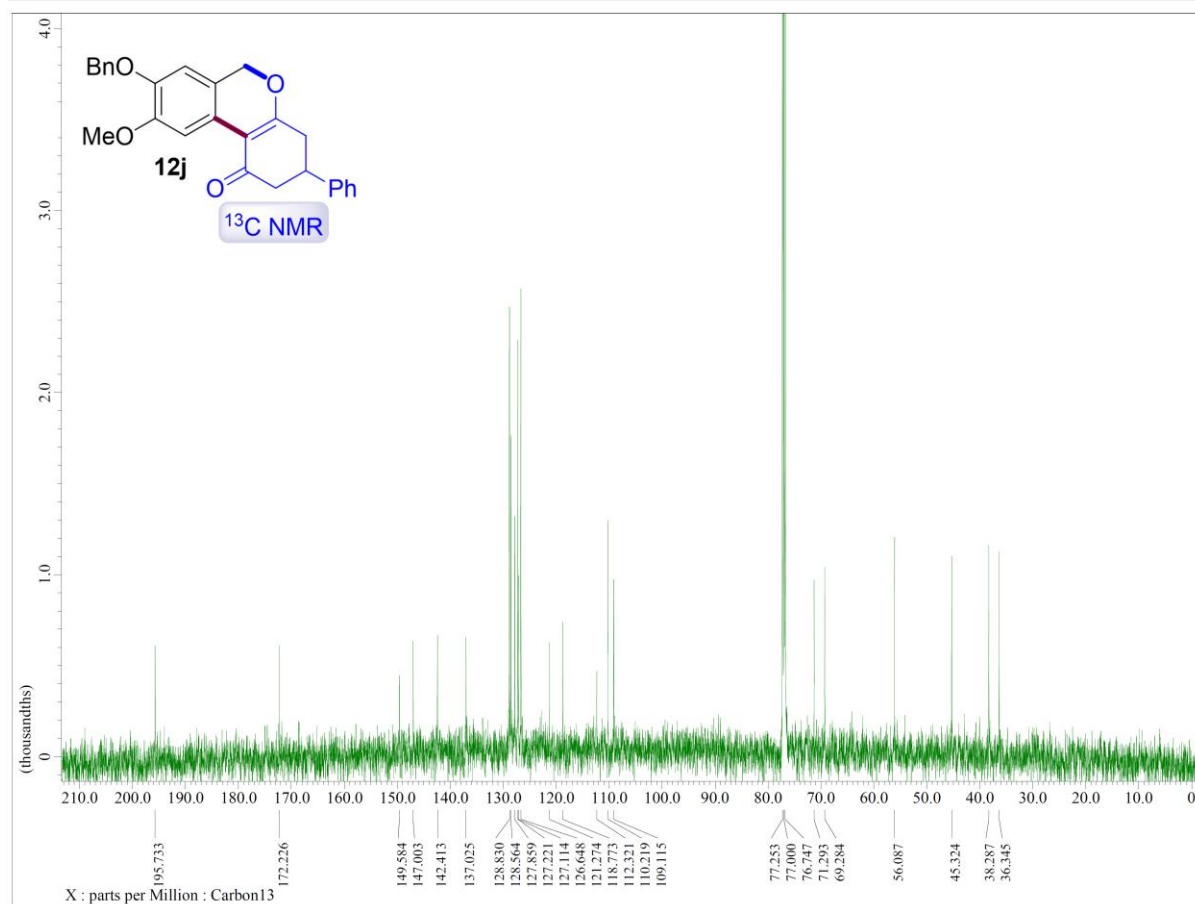

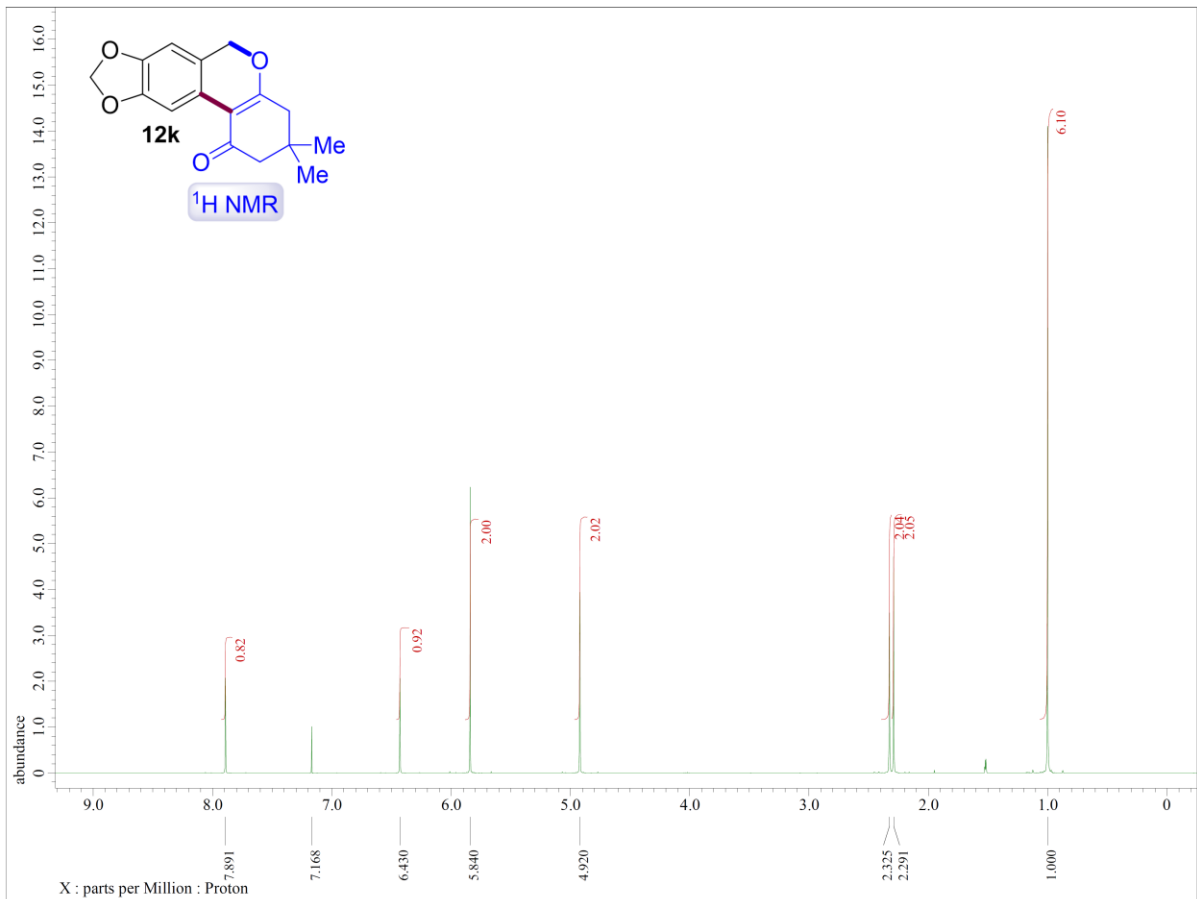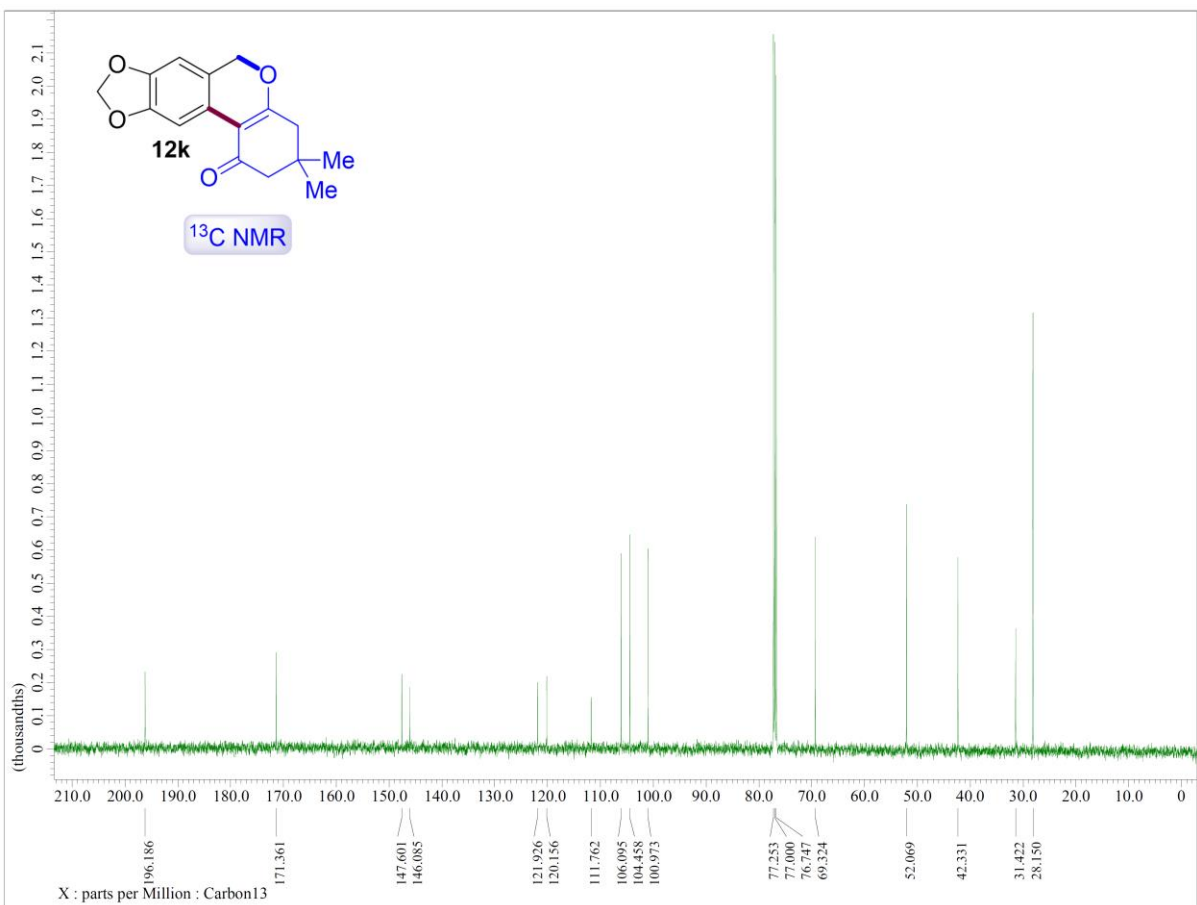

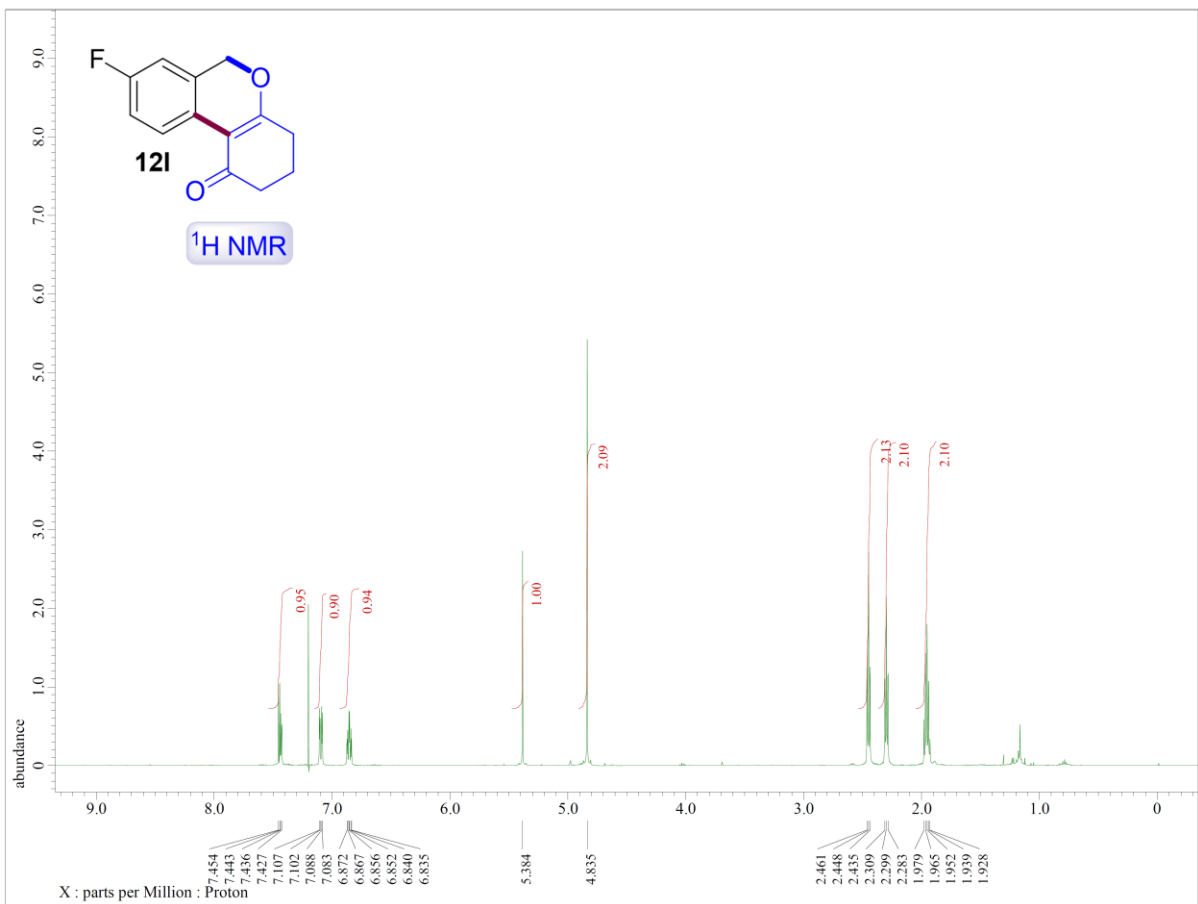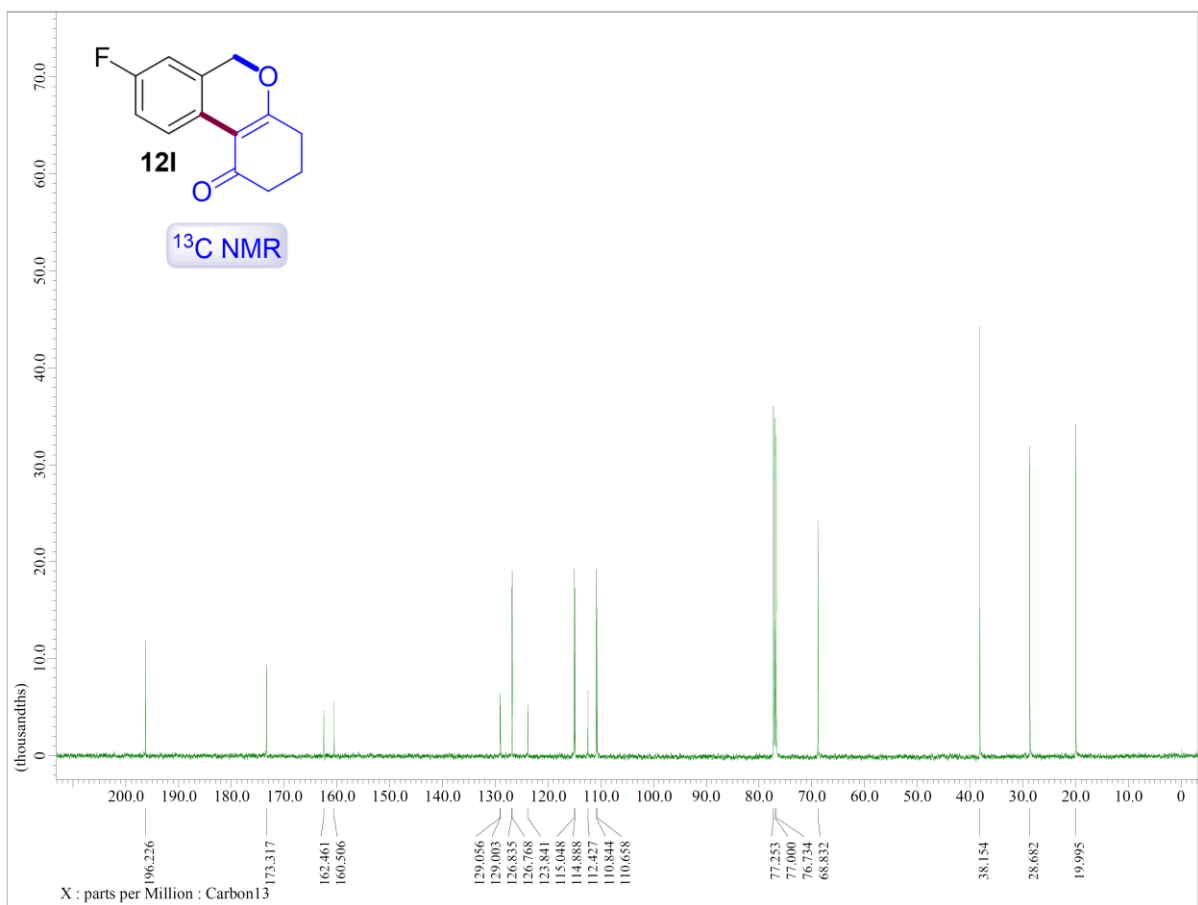

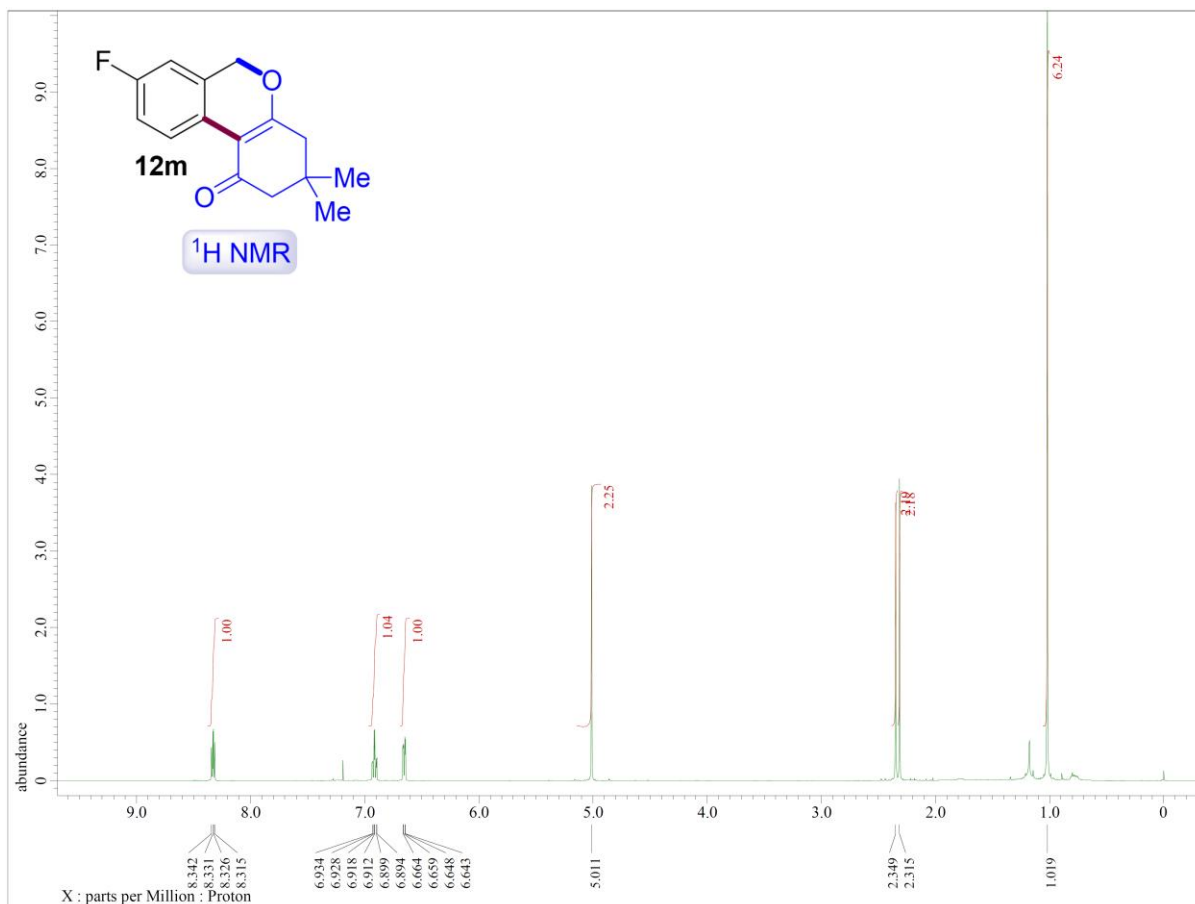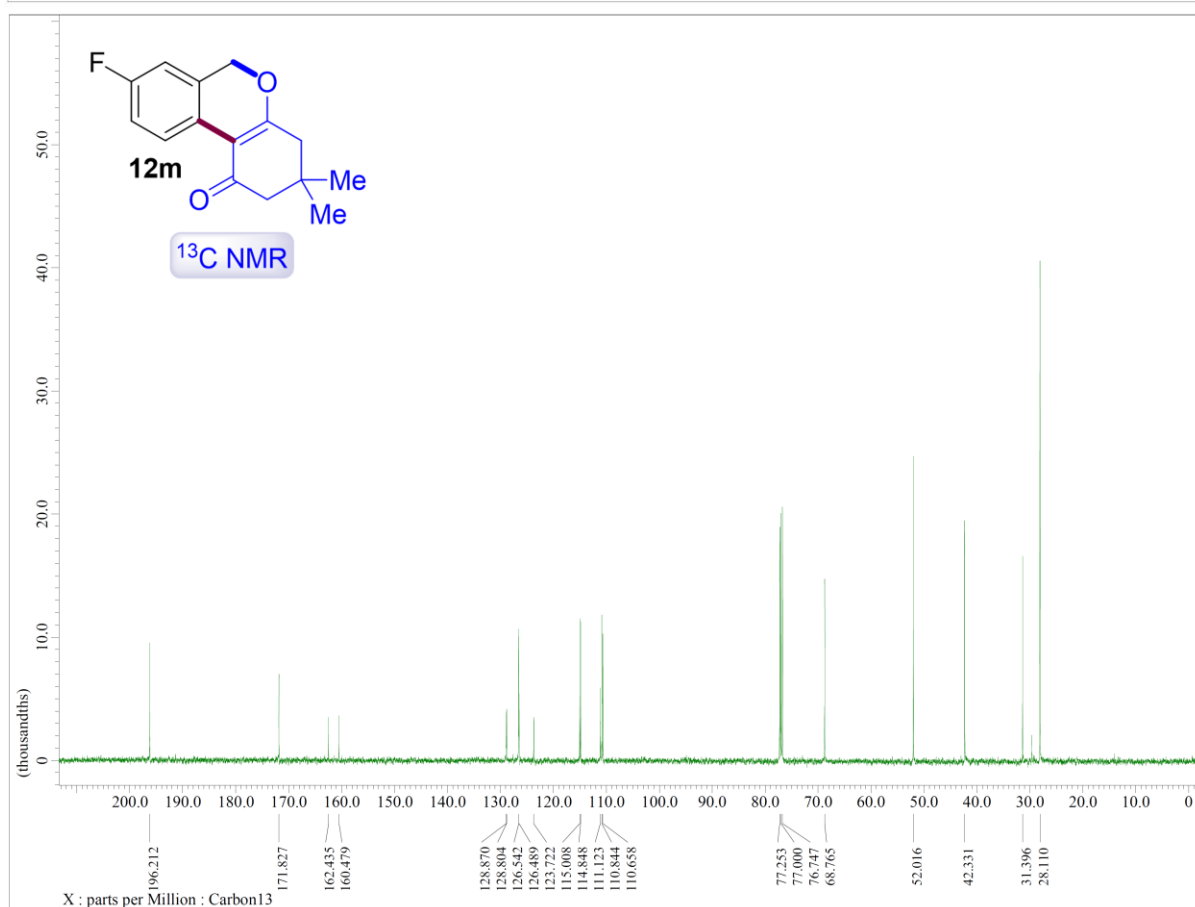

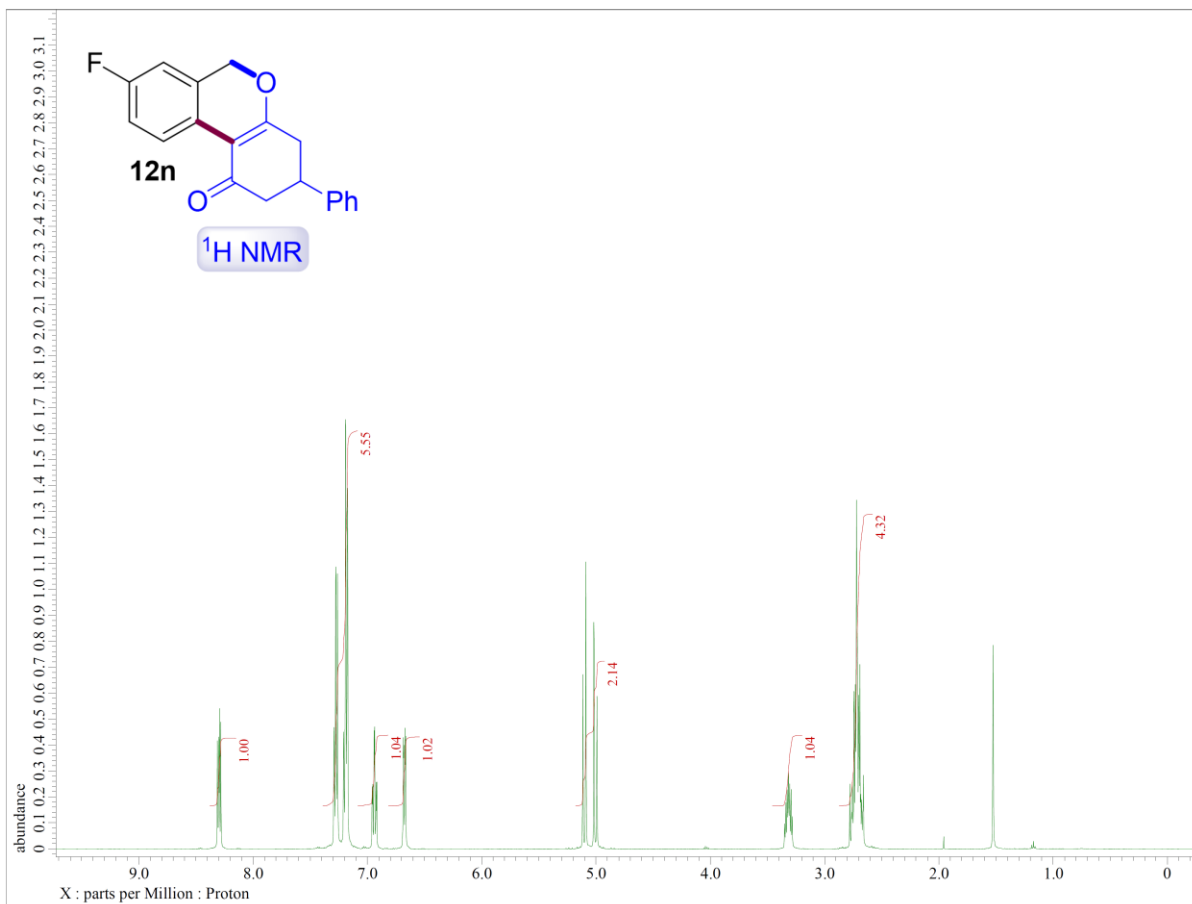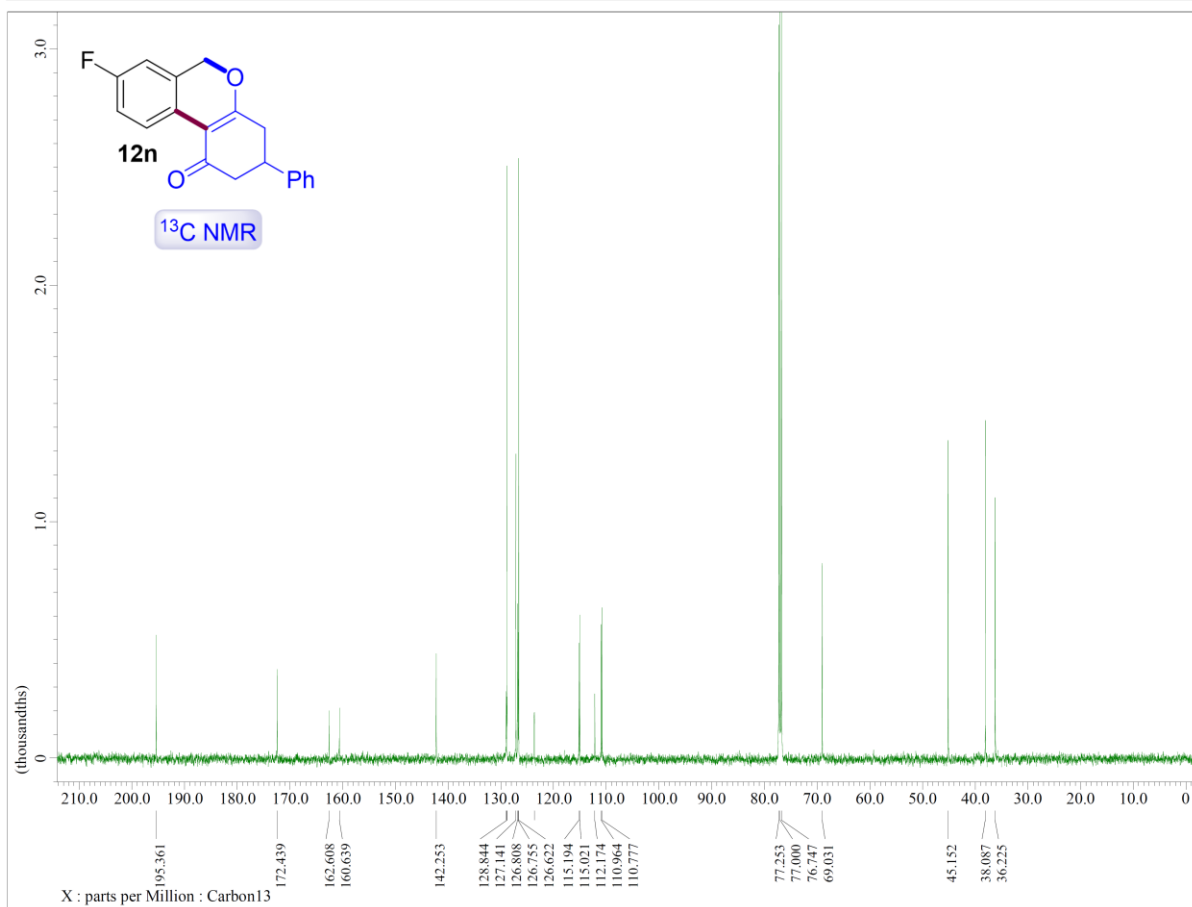

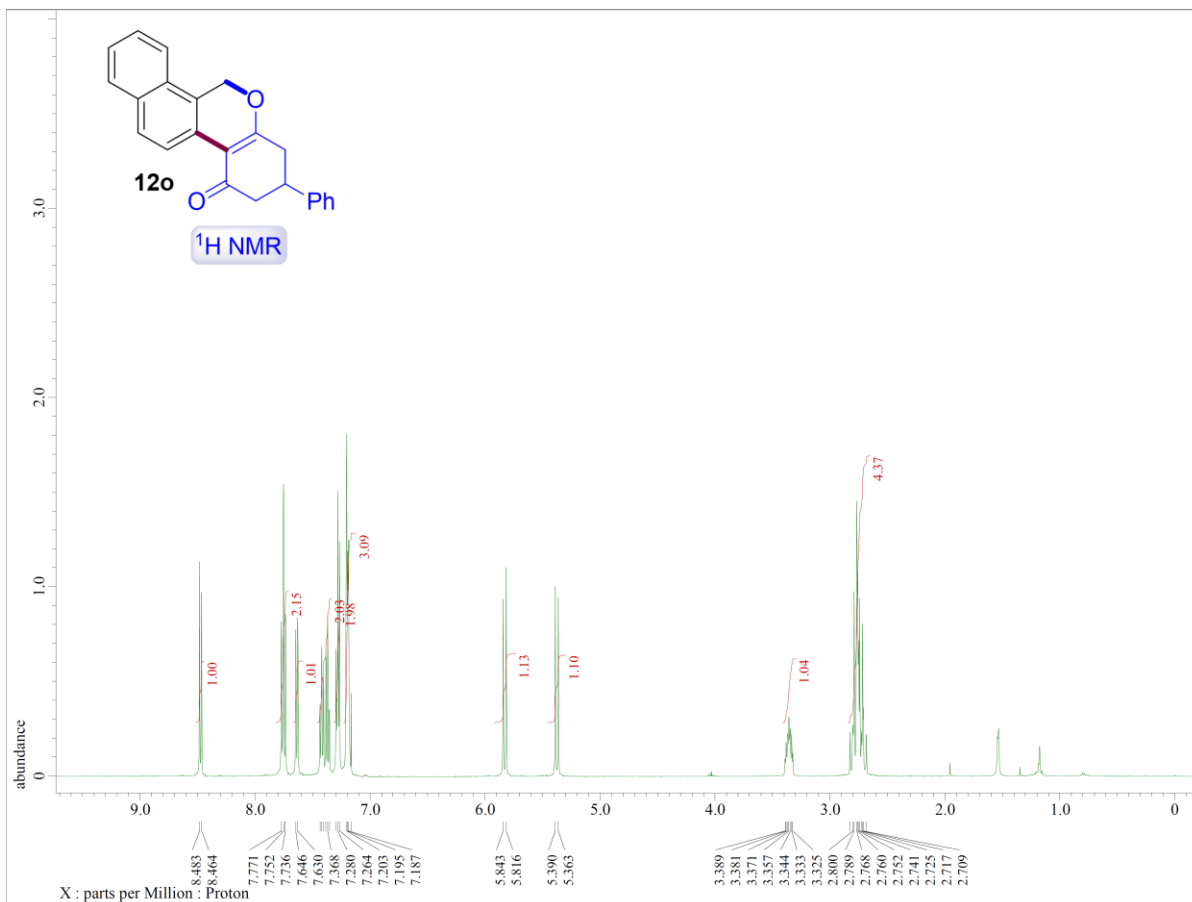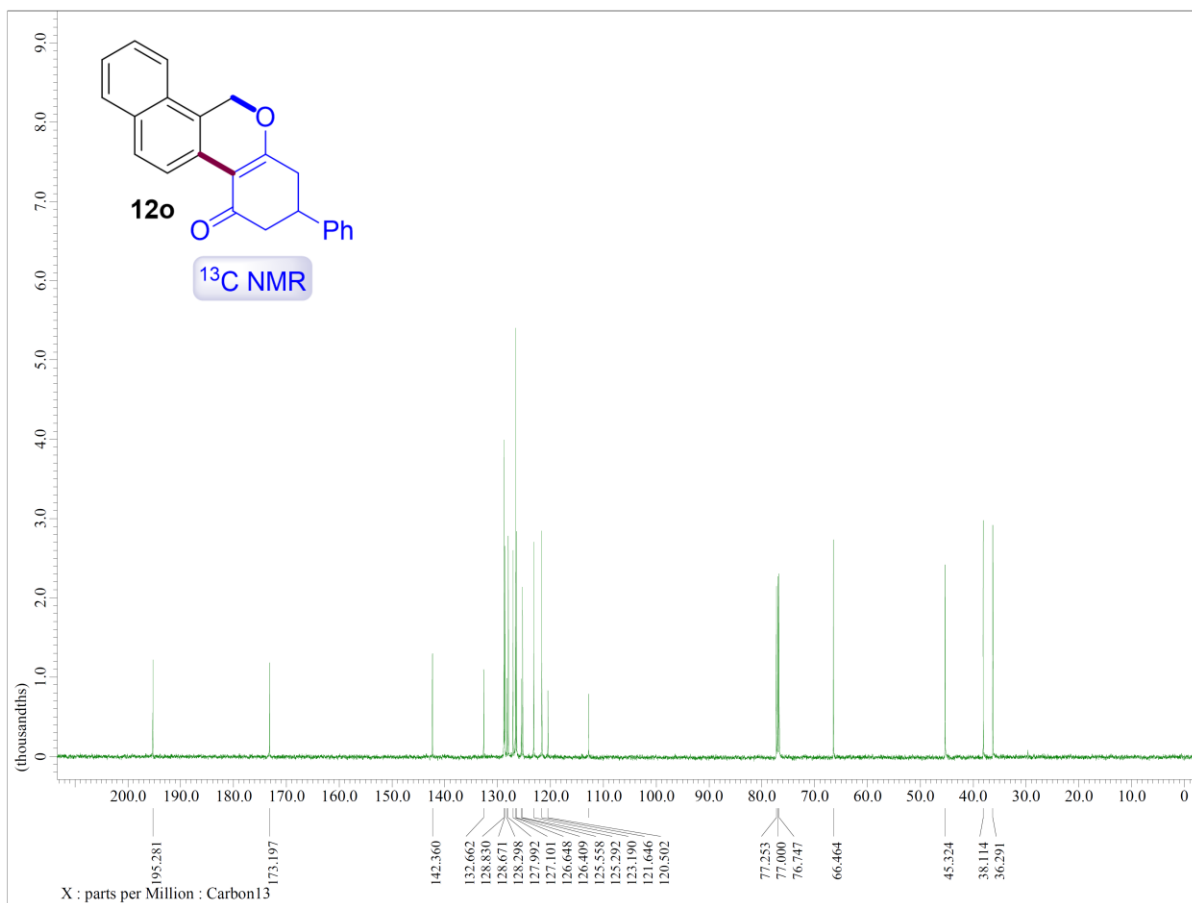



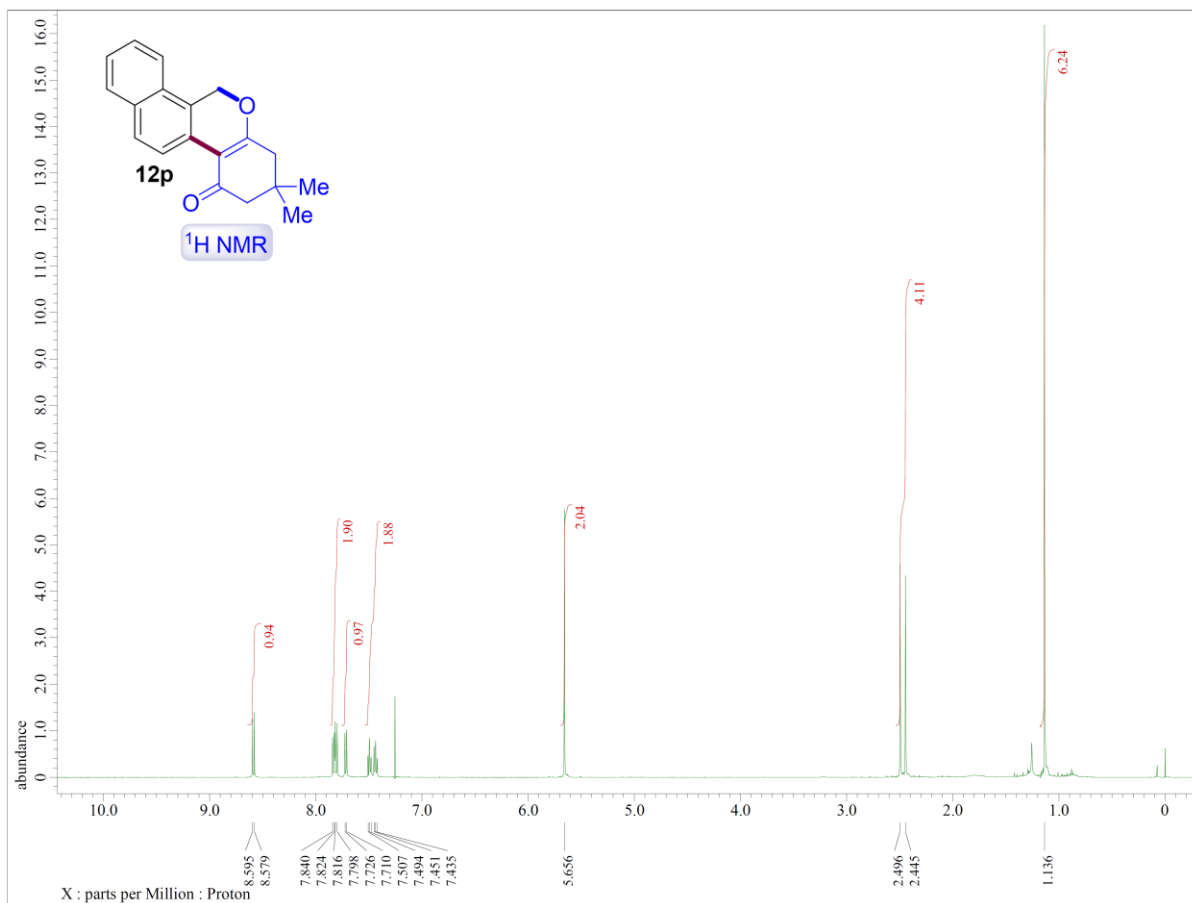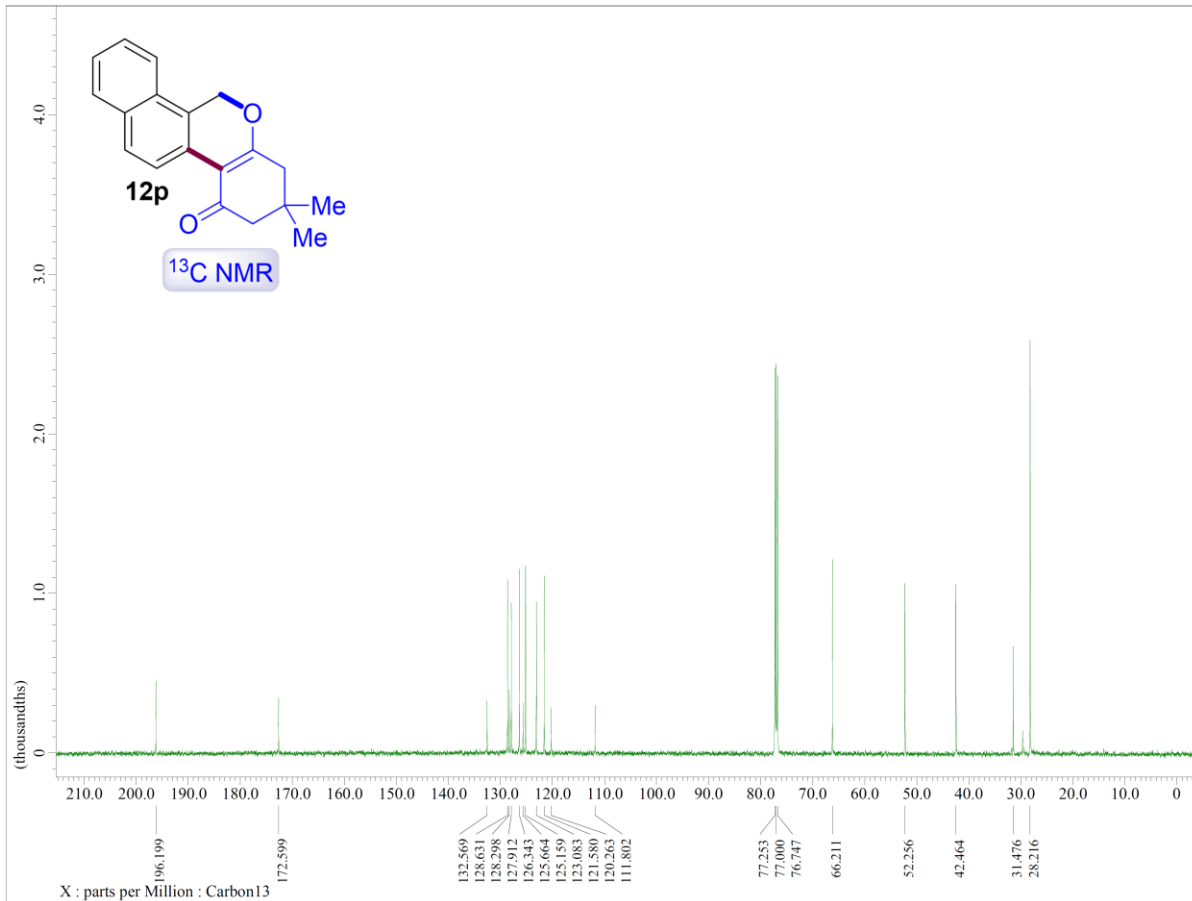

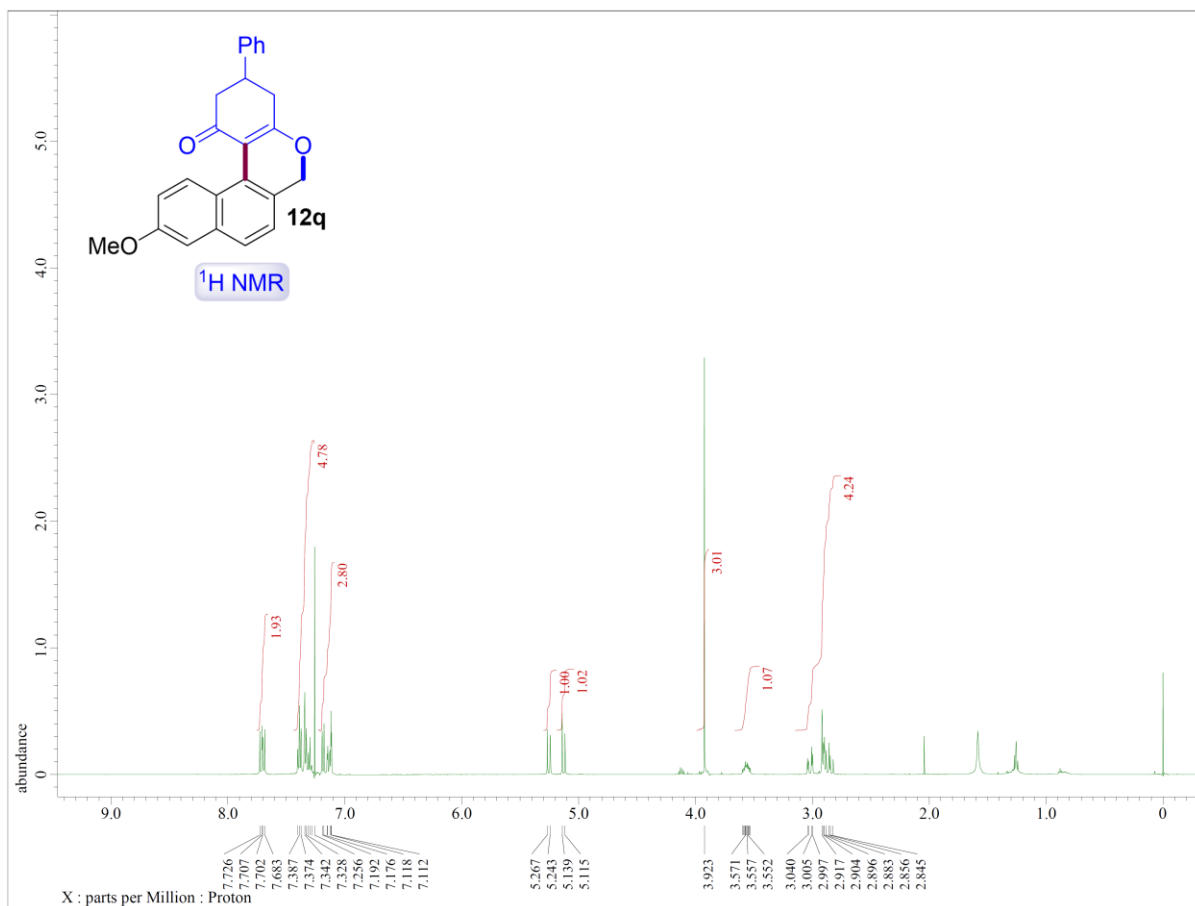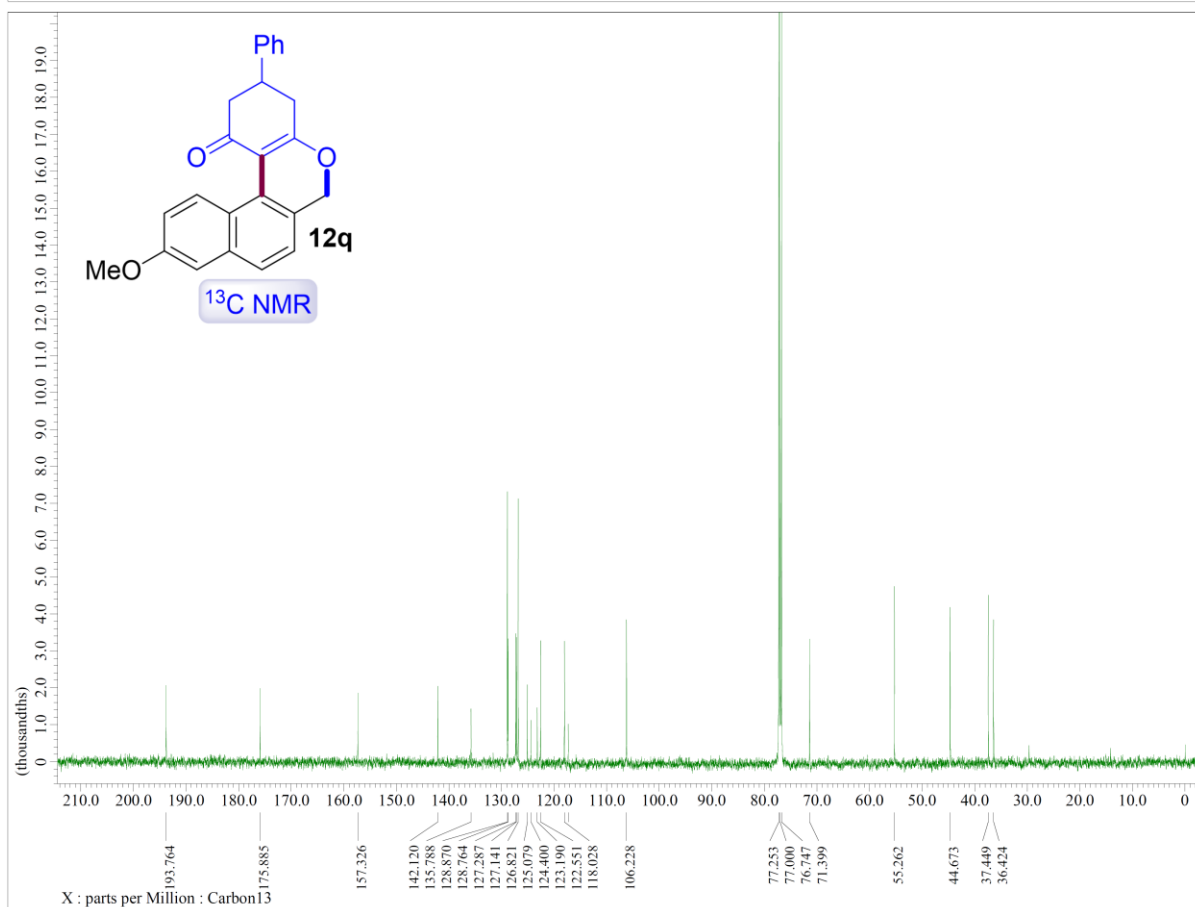

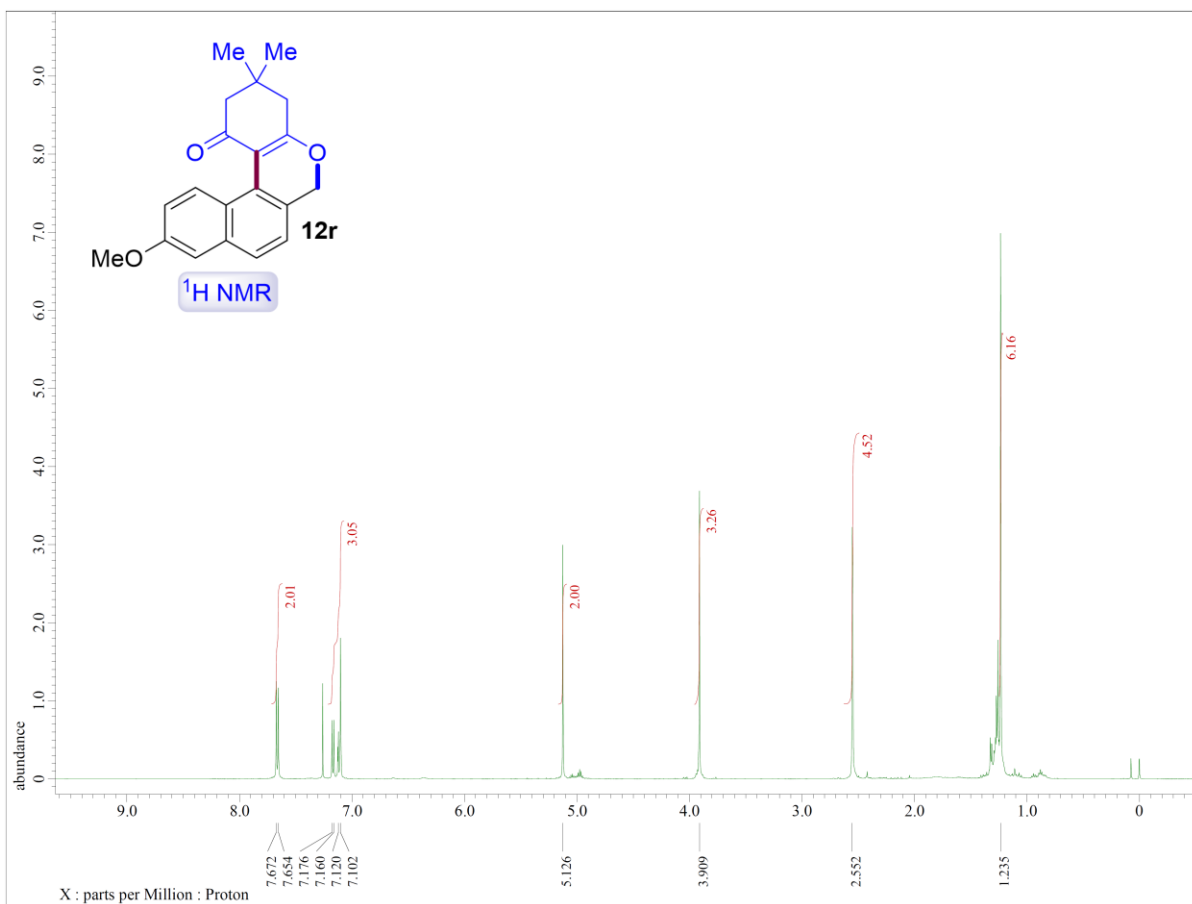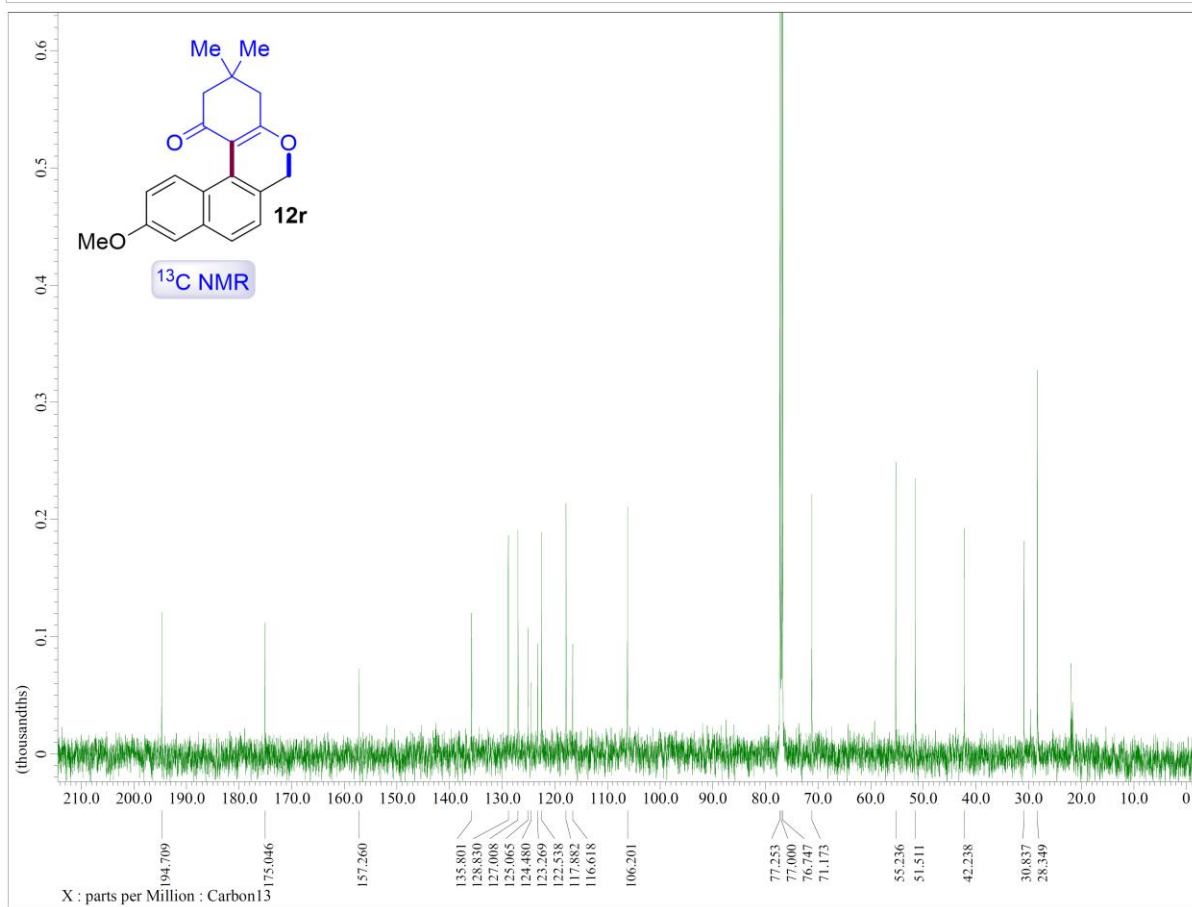

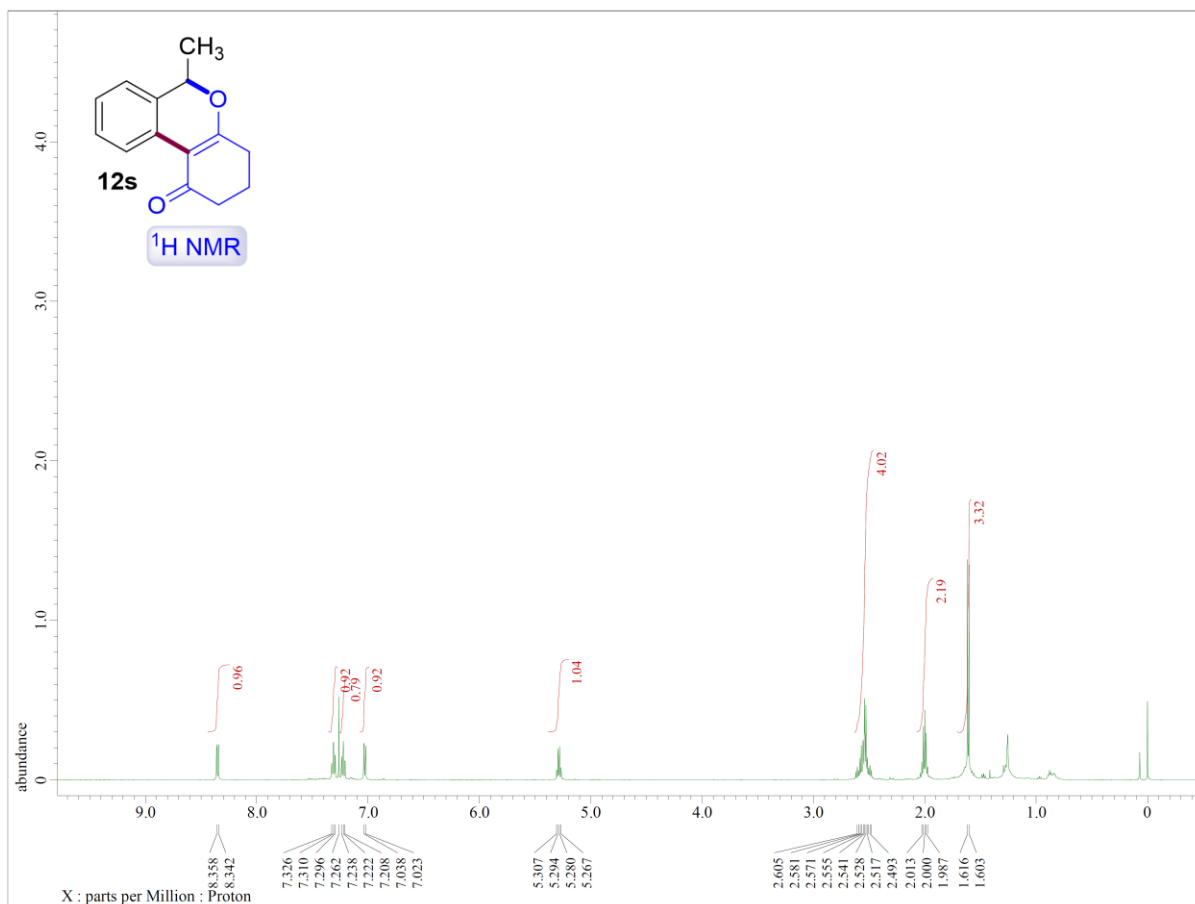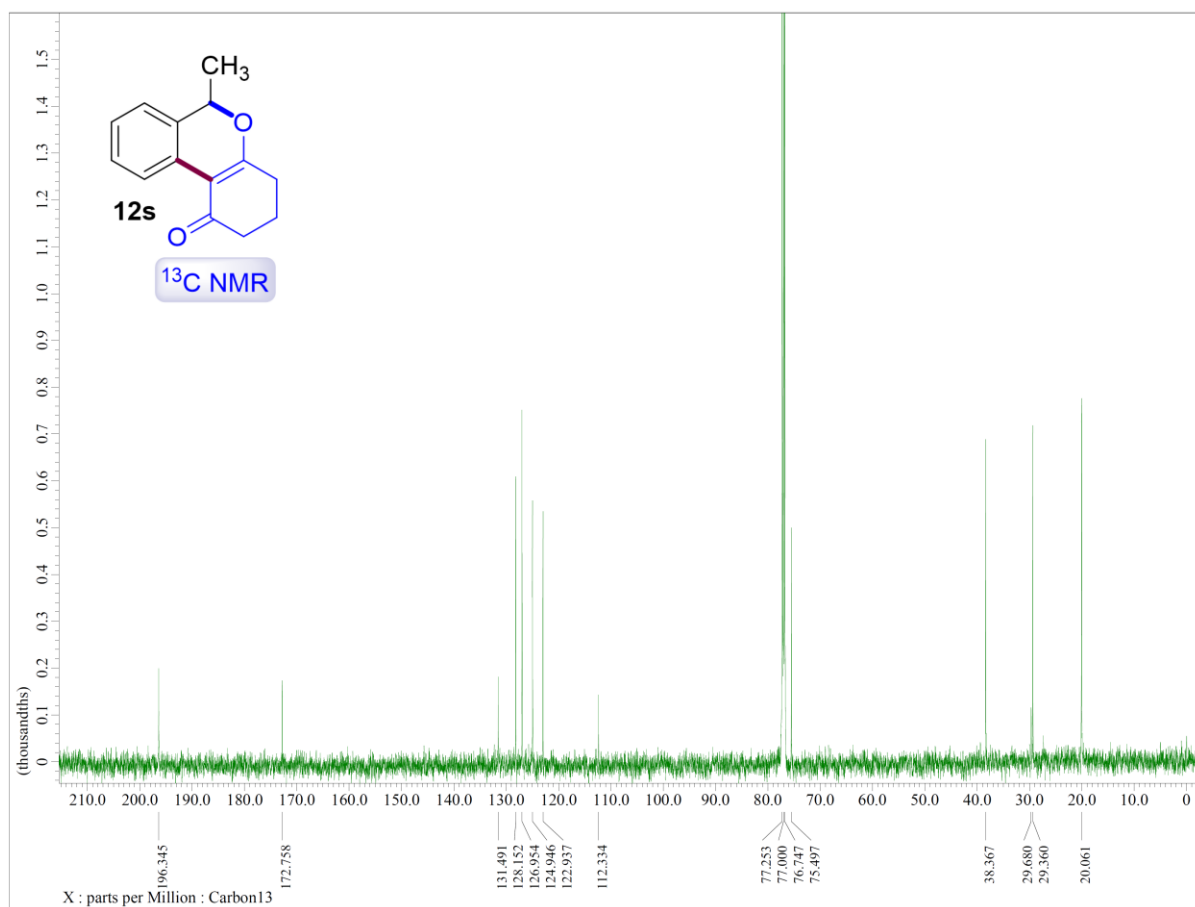

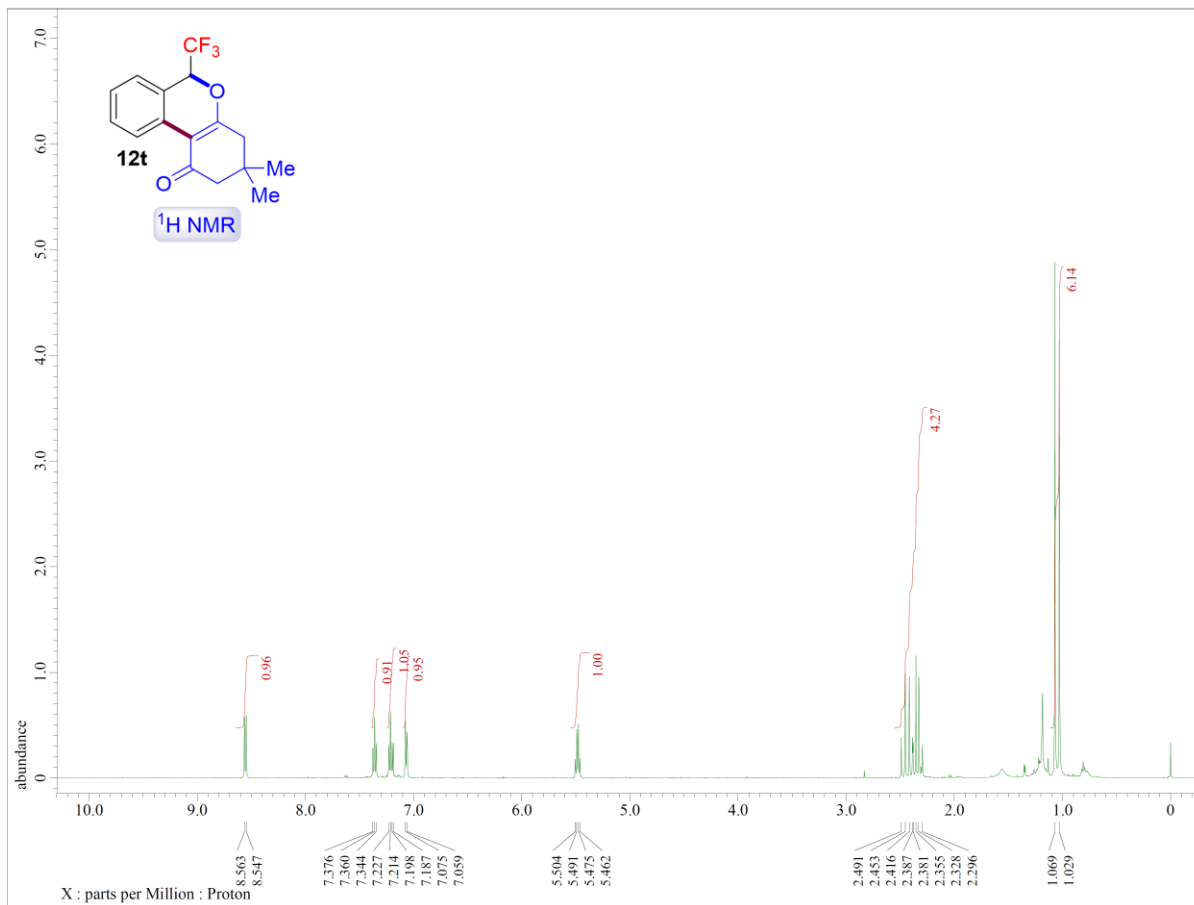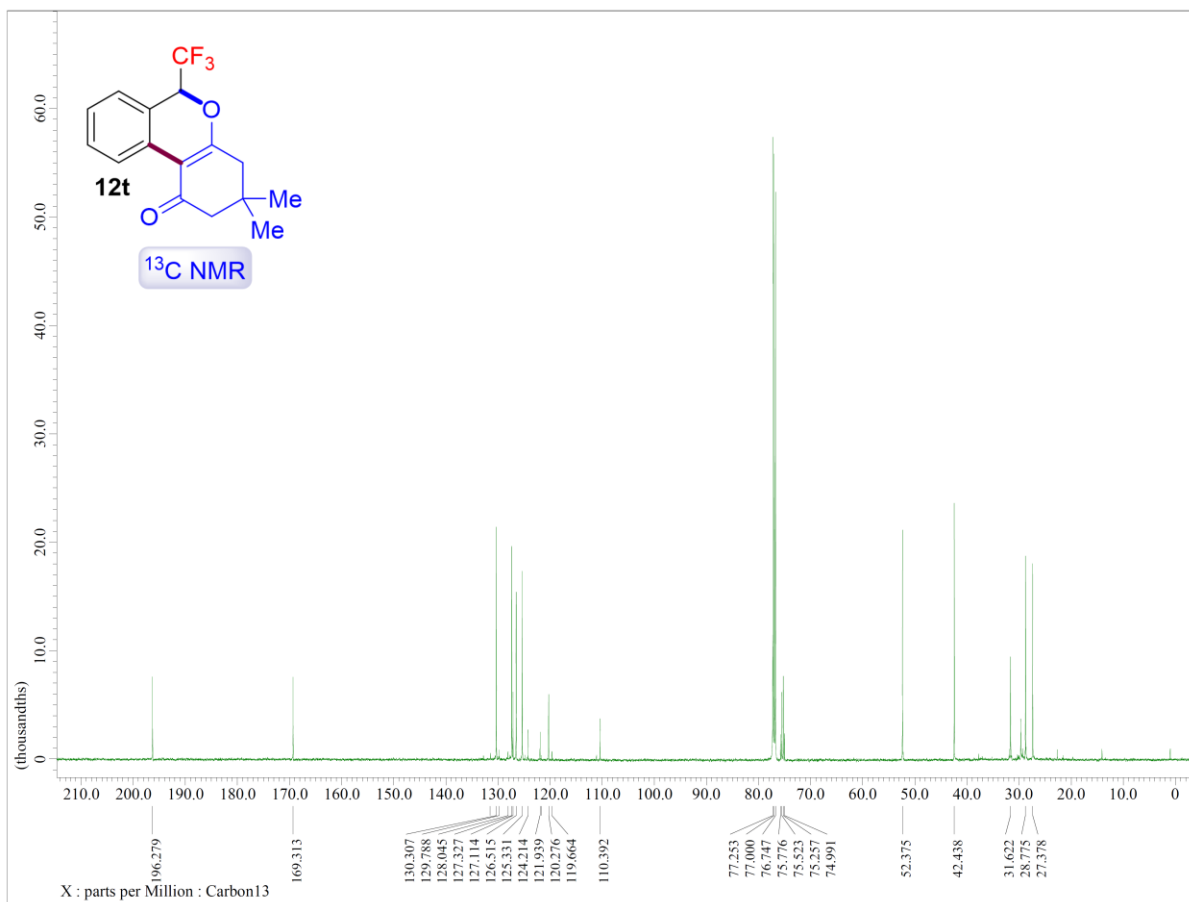

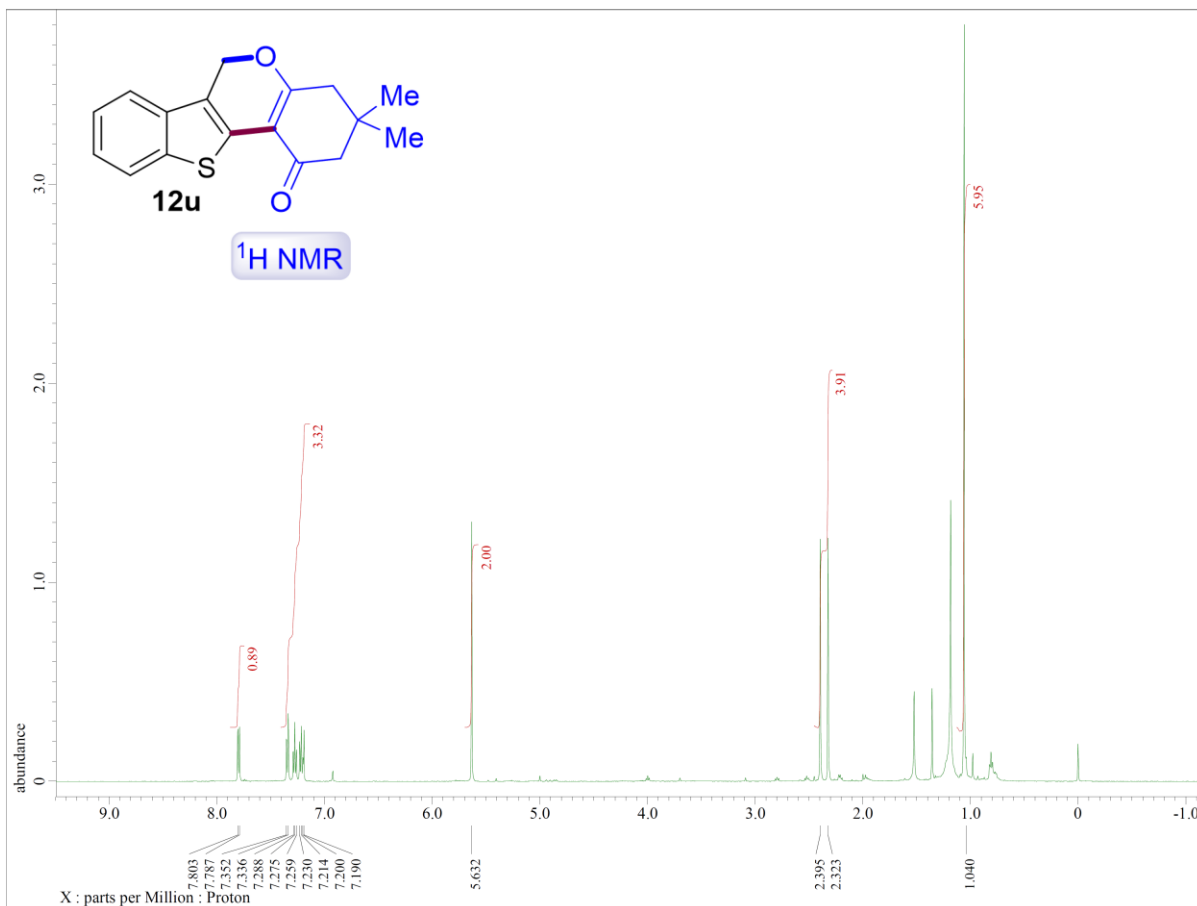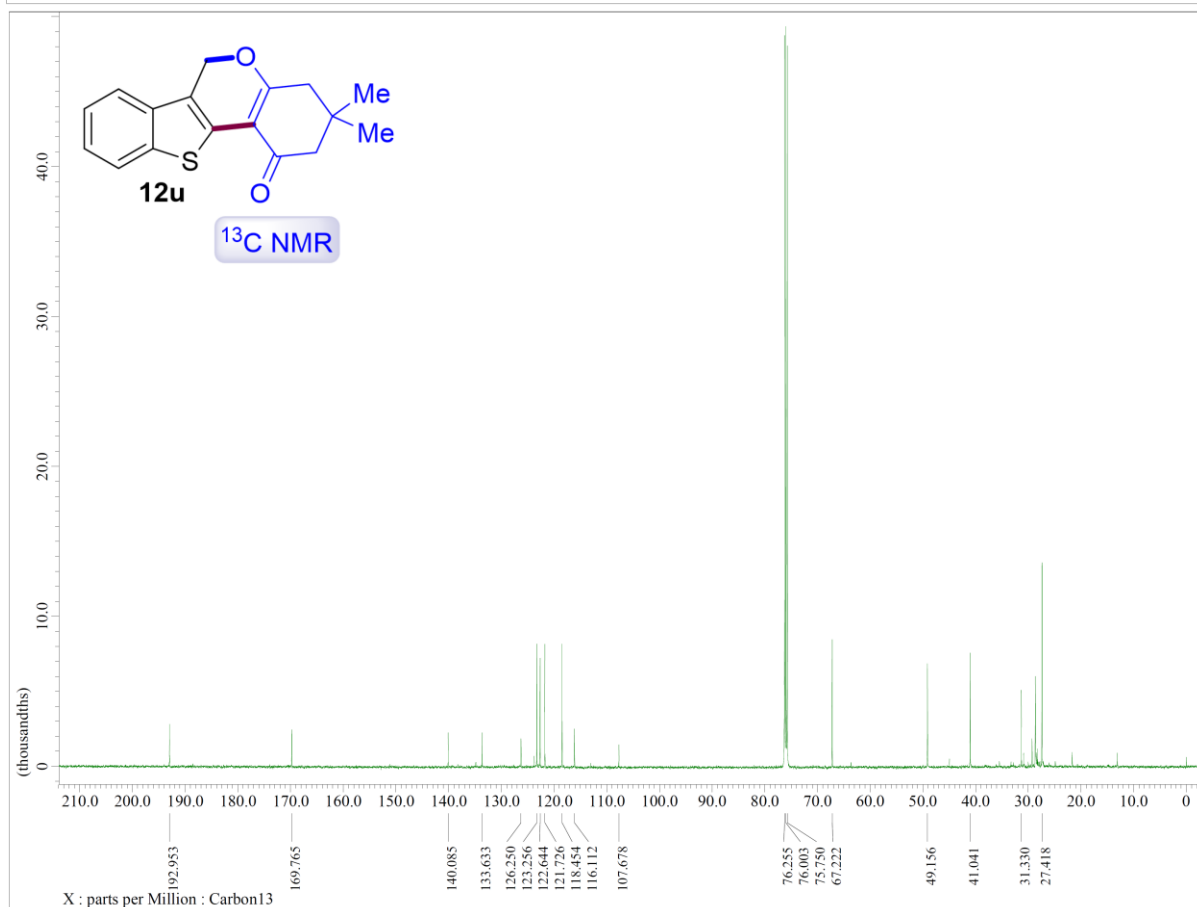

Supplement: d3nj02306k1.pdf [file d3nj02306k1.pdf]
